# Supplementary material for: Enantioselective Michael addition of malonates to β,γ-unsaturated α-ketoesters catalysed by Cu(ii) complexes bearing binaphthyl–proline hybrid ligands
Source: Royal Society of Chemistry journal article supplement (doi:10.1039/d2ob02305a), 2023-01-01
Supplement: d2ob02305a1.pdf [file d2ob02305a1.pdf]

## Electronic Supplementary Information

Enantioselective Michael addition of malonates to  $\beta,\gamma$ -unsaturated  $\alpha$ -ketoesters catalysed by Cu(II) complexes bearing binaphthyl-proline hybrid ligands

Shibo Yu, Qihang Cai, Jiahui Li, Tianxu Yu, Jiemin Liang, Zilin Jiao, Chao Yao,\* Yue-Ming Li\*

State Key Laboratory of Medicinal Chemical Biology, College of Pharmacy and Tianjin Key

Laboratory of Molecular Drug Research, Nankai University, Tianjin 300350, China

E-mail: ymli@nankai.edu.cn

### Table of Contents

|                                                                          |     |
|--------------------------------------------------------------------------|-----|
| 1. Experimental Data of Enantioselective Michael Addition Reactions..... | S1  |
| 2. NMR Spectra of the Products.....                                      | S13 |
| 3. HPLC Charts of the Products.....                                      | S45 |
| 4. References.....                                                       | S76 |

## 1. Experimental Data of Enantioselective Michael Addition Reactions

### 1,1-dimethyl 4-ethyl (2*S*)-4-oxo-2-phenylbutane-1,1,4-tricarboxylate (3a)

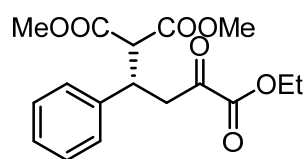

Yellow oil (93% yield, 92% ee);  $[\alpha]_D^{20} = +14.2$  ( $c = 0.80$ ,  $\text{CH}_2\text{Cl}_2$ ); HPLC analysis Daicel Chiralcel AS-H column, *n*-hexane/*i*-PrOH = 90:10, flow rate = 1.0 mL/min,  $T = 25^\circ\text{C}$ , UV = 210 nm;  $t$  (major) = 11.60 min,  $t$  (minor) = 12.91 min;  $^1\text{H}$  NMR (400 MHz, Chloroform-*d*)  $\delta$  7.17 (m, 5H), 4.18 (q,  $J = 7.1$  Hz, 2H), 3.97 (td,  $J = 9.2, 5.0$  Hz, 1H), 3.69 (m, 4H), 3.47 – 3.20 (m, 5H), 1.24 (t,  $J = 7.1$  Hz, 3H).  $^{13}\text{C}\{^1\text{H}\}$  NMR (100 MHz, Chloroform-*d*)  $\delta$  191.7, 168.4, 167.8, 160.5, 139.8, 128.6, 128.1, 127.5, 62.5, 57.0, 52.8, 52.4, 43.1, 40.0, 13.9. **HRMS (ESI)**: exact mass calcd for  $\text{C}_{17}\text{H}_{20}\text{NaO}_7^+$  ( $\text{M}+\text{Na}$ ) $^+$  requires  $m/z$  359.1101, found  $m/z$  359.1096.

### 1,1-diethyl 4-ethyl (2*S*)-4-oxo-2-phenylbutane-1,1,4-tricarboxylate (3b)

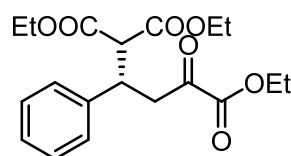

Yellow oil (88% yield, 86% ee);  $[\alpha]_D^{20} = +9.90$  ( $c = 1.00$ ,  $\text{CH}_2\text{Cl}_2$ ); HPLC analysis Daicel Chiralcel AD-H column, *n*-hexane/*i*-PrOH = 80:20, flow rate = 1.0 mL/min,  $T = 25^\circ\text{C}$ , UV = 210 nm;  $t$  (minor) = 9.00 min,  $t$  (major) = 10.82 min;  $^1\text{H}$  NMR (400 MHz, Chloroform-*d*)  $\delta$  7.30 – 7.18 (m, 5H), 4.31 – 4.14 (m, 4H), 4.03 (m, 1H), 3.93 (m, 2H), 3.73 (dd,  $J = 10.2, 1.5$  Hz, 1H), 3.49 – 3.22 (m, 2H), 1.28 (m, 6H), 0.99 (m, 3H).  $^{13}\text{C}\{^1\text{H}\}$  NMR (100 MHz, Chloroform-*d*)  $\delta$  191.7, 168.1, 167.4, 160.5, 139.9, 128.5, 128.2, 127.4, 62.5, 61.8, 61.4, 57.3, 43.4, 40.0, 14.0, 13.9, 13.7.

Note: The absolute configuration of product 3b could be determined as (*S*)-configuration after comparing the sign of specific optical rotation with reference result (Org. Chem. Front., 2019,6, 2907-2915). This is also in agreement with the structure model in which Re-attack occurred during the reaction.<sup>1</sup>

### 1,1-diisopropyl 4-ethyl (2*S*)-4-oxo-2-phenylbutane-1,1,4-tricarboxylate (3c)

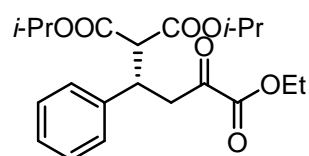

Yellow oil (89% yield, 90% ee);  $[\alpha]_D^{20} = +16.2$  ( $c = 0.90$ ,  $\text{CH}_2\text{Cl}_2$ ); HPLC analysis Daicel Chiralcel AD-H column, *n*-hexane/*i*-PrOH = 80:20, flow rate = 1.0 mL/min,  $T = 25^\circ\text{C}$ , UV = 210 nm;  $t$  (minor) = 9.11 min,  $t$  (major) = 13.11 min;  $^1\text{H}$  NMR (400 MHz, Chloroform-*d*)  $\delta$  7.30 – 7.09 (m, 5H), 5.05 (m,

1H), 4.76 (pd,  $J = 6.3, 1.6$  Hz, 1H), 4.23 (q,  $J = 7.2$  Hz, 2H), 4.09 – 3.88 (m, 1H), 3.68 (dd,  $J = 10.4, 1.6$  Hz, 1H), 3.51 – 3.09 (m, 2H), 1.30 (td,  $J = 7.1, 1.6$  Hz, 3H), 1.24 (td,  $J = 6.2, 1.6$  Hz, 6H), 1.03 (dd,  $J = 6.3, 1.6$  Hz, 3H), 0.95 (dd,  $J = 6.3, 1.6$  Hz, 3H).  $^{13}\text{C}\{^1\text{H}\}$  NMR (100 MHz, Chloroform- $d$ )  $\delta$  191.7, 167.7, 166.9, 160.5, 139.9, 128.5, 128.4, 127.3, 69.4, 68.9, 62.4, 57.5, 43.7, 39.9, 21.6, 21.5, 21.3, 21.2, 13.9. **HRMS (ESI)**: exact mass calcd for  $\text{C}_{21}\text{H}_{28}\text{NaO}_7^+$  ( $\text{M}+\text{Na}$ ) $^+$  requires  $m/z$  415.1727, found  $m/z$  415.1723.

### 1,1-dimethyl 4-ethyl (2*S*)-2-(2-fluorophenyl)-4-oxobutane-1,1,4-tricarboxylate (3d)

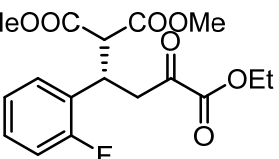
 Yellow oil (85% yield, 82% ee);  $[\alpha]_{\text{D}}^{20} = +10.72$  ( $c = 0.80, \text{CH}_2\text{Cl}_2$ );  
 HPLC analysis Daicel Chiralcel AD-H column, *n*-hexane/*i*-PrOH = 80:20, flow rate = 1.0 mL/min,  $T = 25^\circ\text{C}$ , UV = 210 nm;  $t$  (major) = 8.84 min,  $t$  (minor) = 11.35 min;  $^1\text{H}$  NMR (400 MHz, Chloroform- $d$ )  $\delta$  7.32 – 7.16 (m, 2H), 7.12 – 6.82 (m, 2H), 4.36 – 4.10 (m, 3H), 3.95 (d,  $J = 10.2$  Hz, 1H), 3.83 – 3.64 (m, 3H), 3.58 – 3.23 (m, 5H), 1.40 – 1.24 (m, 3H).  $^{13}\text{C}\{^1\text{H}\}$  NMR (100 MHz, Chloroform- $d$ )  $\delta$  191.5, 168.3, 167.8, 162.2, 160.4, 159.7, 130.8, 130.7, 129.4, 129.3, 126.4, 126.3, 124.2, 124.2, 116.0, 115.7, 62.6, 55.1, 55.1, 52.8, 52.5, 41.8, 41.8, 35.6, 13.9. **HRMS (ESI)**: exact mass calcd for  $\text{C}_{17}\text{H}_{19}\text{FNaO}_7^+$  ( $\text{M}+\text{Na}$ ) $^+$  requires  $m/z$  377.1007, found  $m/z$  377.1003.

### 1,1-dimethyl 4-ethyl (*S*)-2-(2-methoxyphenyl)-4-oxobutane-1,1,4-tricarboxylate (3e)

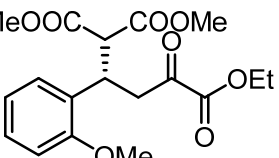
 Yellow oil (84% yield, 86% ee);  $[\alpha]_{\text{D}}^{20} = +17.42$  ( $c = 0.70, \text{CH}_2\text{Cl}_2$ );  
 HPLC analysis Daicel Chiralcel AD-H column, *n*-hexane/*i*-PrOH = 80:20, flow rate = 1.0 mL/min,  $T = 25^\circ\text{C}$ , UV = 210 nm;  $t$  (major) = 9.09 min,  $t$  (minor) = 11.68 min;  $^1\text{H}$  NMR (400 MHz, Chloroform- $d$ )  $\delta$  7.23 – 7.13 (m, 2H), 6.90 – 6.76 (m, 2H), 4.30 – 4.21 (m, 2H), 4.20 – 4.09 (m, 2H), 3.84 (s, 3H), 3.72 (s, 3H), 3.54 – 3.47 (m, 1H), 3.46 (s, 3H), 3.37 – 3.27 (m, 1H), 1.31 (t,  $J = 7.1$  Hz, 3H).  $^{13}\text{C}\{^1\text{H}\}$  NMR (100 MHz, Chloroform- $d$ )  $\delta$  192.2, 168.9, 168.3, 160.6, 157.3, 130.5, 128.7, 127.0, 120.5, 110.9, 62.3, 55.2, 54.4, 52.6, 52.3, 41.3, 37.3, 13.9. **HRMS (ESI)**: exact mass calcd for  $\text{C}_{18}\text{H}_{22}\text{NaO}_8^+$  ( $\text{M}+\text{Na}$ ) $^+$  requires  $m/z$  389.1207, found  $m/z$  389.1210.

### 1,1-dimethyl 4-ethyl (*S*)-2-(3-fluorophenyl)-4-oxobutane-1,1,4-tricarboxylate (3f)

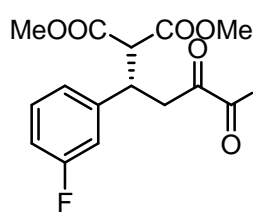

Yellow oil (87% yield, 86% ee);  $[\alpha]_{\text{D}}^{20} = +4.88$  ( $c = 1.00$ ,  $\text{CH}_2\text{Cl}_2$ ); HPLC analysis Daicel Chiralcel AD-H column, *n*-hexane/*i*-PrOH = 80:20, flow rate = 1.0 mL/min,  $T = 25^\circ\text{C}$ , UV = 210 nm;  $t$  (major) = 8.84 min,  $t$  (minor) = 11.35 min;  $^1\text{H NMR}$  (400 MHz, Chloroform-*d*)  $\delta$  7.20 – 7.14 (m, 1H), 6.97 (d,  $J = 7.7$  Hz, 1H), 6.93 – 6.78 (m, 2H), 4.20 (q,  $J = 7.1$  Hz, 2H), 3.97 (td,  $J = 9.2, 5.0$  Hz, 1H), 3.74 – 3.60 (m, 4H), 3.46 (s, 3H), 3.30 (m, 2H), 1.26 (t,  $J = 7.1$  Hz, 3H).  $^{13}\text{C}\{^1\text{H}\}$  NMR (100 MHz, Chloroform-*d*)  $\delta$  191.3, 168.2, 167.6, 163.9, 161.5, 160.4, 142.4, 142.3, 130.2, 130.1, 123.8, 123.8, 115.2, 115.0, 114.6, 114.4, 62.6, 56.7, 52.8, 52.6, 42.9, 39.6, 13.9. **HRMS (ESI)**: exact mass calcd for  $\text{C}_{17}\text{H}_{19}\text{FNaO}_7^+$  ( $\text{M}+\text{Na}$ ) $^+$  requires  $m/z$  377.1007, found  $m/z$  377.1005.

### 1,1-dimethyl 4-ethyl (*S*)-2-(3-chlorophenyl)-4-oxobutane-1,1,4-tricarboxylate (3g)

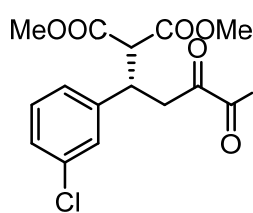

Yellow oil (90% yield, 91% ee);  $[\alpha]_{\text{D}}^{20} = +20.84$  ( $c = 1.60$ ,  $\text{CH}_2\text{Cl}_2$ ); HPLC analysis Daicel Chiralcel AD-H column, *n*-hexane/*i*-PrOH = 80:20, flow rate = 1.0 mL/min,  $T = 25^\circ\text{C}$ , UV = 210 nm;  $t$  (major) = 8.37 min,  $t$  (minor) = 10.75 min;  $^1\text{H NMR}$  (400 MHz, Chloroform-*d*)  $\delta$  7.26 – 7.12 (m, 4H), 4.27 (m, 2H), 4.01 (m, 1H), 3.79 – 3.69 (m, 4H), 3.54 (s, 3H), 3.45 – 3.29 (m, 2H), 1.33 (t,  $J = 7.1$  Hz, 3H).  $^{13}\text{C}\{^1\text{H}\}$  NMR (100 MHz, Chloroform-*d*)  $\delta$  191.3, 168.2, 167.6, 160.3, 141.9, 134.4, 129.9, 128.2, 127.7, 126.4, 62.7, 56.6, 52.9, 52.6, 42.8, 39.5, 13.9. **HRMS (ESI)**: exact mass calcd for  $\text{C}_{17}\text{H}_{19}\text{ClNaO}_7^+$  ( $\text{M}+\text{Na}$ ) $^+$  requires  $m/z$  393.0712, found  $m/z$  393.0709.

### 1,1-dimethyl 4-ethyl (*S*)-2-(3-bromophenyl)-4-oxobutane-1,1,4-tricarboxylate (3h)

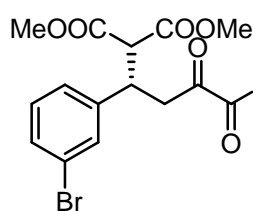

Yellow oil (94% yield, 92% ee);  $[\alpha]_{\text{D}}^{20} = +9.46$  ( $c = 1.00$ ,  $\text{CH}_2\text{Cl}_2$ ); HPLC analysis Daicel Chiralcel AD-H column, *n*-hexane/*i*-PrOH = 80:20, flow rate = 1.0 mL/min,  $T = 25^\circ\text{C}$ , UV = 210 nm;  $t$  (major) = 8.91 min,  $t$  (minor) = 11.64 min;  $^1\text{H NMR}$  (400 MHz, Chloroform-*d*)  $\delta$  7.40 (t,  $J = 1.8$  Hz, 1H), 7.35 (m, 1H), 7.22 – 7.13 (m, 2H), 4.28 (td,  $J = 7.2, 1.1$  Hz, 2H), 4.00 (m, 1H), 3.76 – 3.71 (m, 4H), 3.54 (s, 3H), 3.44 – 3.30 (m, 2H), 1.33 (t,  $J = 7.2$  Hz, 3H).  $^{13}\text{C}\{^1\text{H}\}$  NMR (100 MHz, Chloroform-*d*)  $\delta$  191.3, 168.2, 167.6, 160.4, 142.2, 131.2, 130.7, 130.2, 126.9, 122.6, 62.7, 56.7, 52.9,

52.6, 42.8, 39.5, 13.9. **HRMS (ESI)**: exact mass calcd for  $C_{17}H_{19}BrNaO_7^+$  ( $M+Na$ )<sup>+</sup> requires  $m/z$  437.0206, found  $m/z$  437.0204.

### 1,1-dimethyl 4-ethyl (*S*)-2-(4-chlorophenyl)-4-oxobutane-1,1,4-tricarboxylate (3i)

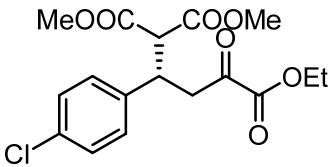 Yellow oil (95% yield, 90% ee);  $[\alpha]_D^{20} = +15.49$  ( $c = 1.00$ ,  $CH_2Cl_2$ ); HPLC analysis Daicel Chiralcel AD-H column, *n*-hexane/*i*-PrOH = 80:20, flow rate = 1.0 mL/min,  $T = 25^\circ C$ , UV = 210 nm;  $t$  (minor) = 11.59 min,  $t$  (major) = 12.52 min;  $^1H$  NMR (400 MHz, Chloroform-*d*)  $\delta$  7.39 – 7.03 (m, 4H), 4.40 – 4.16 (m, 2H), 4.02 (m, 1H), 3.85 – 3.62 (m, 4H), 3.52 (s, 3H), 3.44 – 3.27 (m, 2H), 1.32 (t,  $J = 7.2$  Hz, 3H).  $^{13}C\{^1H\}$  NMR (100 MHz, Chloroform-*d*)  $\delta$  191.4, 168.2, 167.6, 160.4, 138.3, 133.3, 129.5, 128.8, 62.6, 56.7, 52.9, 52.6, 43.0, 39.3, 13.9. **HRMS (ESI)**: exact mass calcd for  $C_{17}H_{19}ClNaO_7^+$  ( $M+Na$ )<sup>+</sup> requires  $m/z$  393.0712, found  $m/z$  393.0706.

### 1,1-dimethyl 4-ethyl (*S*)-2-(4-bromophenyl)-4-oxobutane-1,1,4-tricarboxylate (3j)

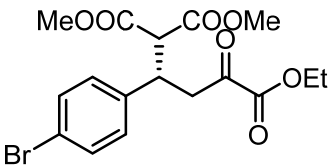 Yellow oil (92% yield, 90% ee);  $[\alpha]_D^{20} = +14.63$  ( $c = 1.00$ ,  $CH_2Cl_2$ ); HPLC analysis Daicel Chiralcel AD-H column, *n*-hexane/*i*-PrOH = 80:20, flow rate = 1.0 mL/min,  $T = 25^\circ C$ , UV = 210 nm;  $t$  (minor) = 12.66 min,  $t$  (major) = 13.77 min;  $^1H$  NMR (400 MHz, Chloroform-*d*)  $\delta$  7.44 – 7.37 (m, 2H), 7.17 – 7.10 (m, 2H), 4.26 (m, 2H), 4.00 (m, 1H), 3.76 – 3.70 (m, 4H), 3.52 (s, 3H), 3.44 – 3.27 (m, 2H), 1.32 (t,  $J = 7.2$  Hz, 3H).  $^{13}C\{^1H\}$  NMR (100 MHz, Chloroform-*d*)  $\delta$  191.4, 168.2, 167.6, 160.4, 138.8, 131.8, 129.9, 121.5, 62.7, 56.6, 52.9, 52.6, 42.9, 39.4, 13.9. **HRMS (ESI)**: exact mass calcd for  $C_{17}H_{19}BrNaO_7^+$  ( $M+Na$ )<sup>+</sup> requires  $m/z$  437.0206, found  $m/z$  437.0202.

### 1,1-dimethyl 4-ethyl (*S*)-2-(4-methylphenyl)-4-oxobutane-1,1,4-tricarboxylate (3k)

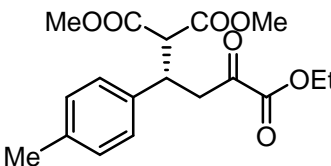 Yellow oil (90% yield, 91% ee);  $[\alpha]_D^{20} = +33.63$  ( $c = 1.00$ ,  $CH_2Cl_2$ ); HPLC analysis Daicel Chiralcel AD-H column, *n*-hexane/*i*-PrOH = 90:10, flow rate = 1.0 mL/min,  $T = 25^\circ C$ , UV = 210 nm;  $t$  (major) = 15.87 min,  $t$  (minor) = 17.03 min;  $^1H$  NMR (400 MHz, Chloroform-*d*)  $\delta$  7.12 (d,  $J = 8.2$  Hz, 2H), 7.07 (d,  $J = 8.0$  Hz, 2H), 4.24 (m, 2H), 4.00 (td,  $J = 9.2, 5.0$  Hz, 1H), 3.75 (d,  $J = 13.1$  Hz, 4H), 3.43

– 3.26 (m, 2H), 2.28 (s, 3H), 1.31 (t,  $J = 7.2$  Hz, 3H).  $^{13}\text{C}\{^1\text{H}\}$  NMR (100 MHz, Chloroform- $d$ )  $\delta$  191.8, 168.5, 167.9, 160.5, 137.1, 136.7, 129.3, 127.9, 62.5, 57.1, 52.7, 52.5, 43.2, 39.6, 21.0, 13.9. **HRMS (ESI)**: exact mass calcd for  $\text{C}_{18}\text{H}_{22}\text{NaO}_7^+$  ( $\text{M}+\text{Na}$ ) $^+$  requires  $m/z$  373.1258, found  $m/z$  373.1253.

**1,1-dimethyl 4-ethyl (*S*)-2-(4-methoxyphenyl)-4-oxobutane-1,1,4-tricarboxylate (3l)**

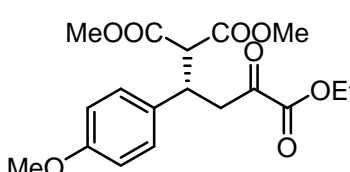 Yellow oil (87% yield, 90% ee);  $[\alpha]_{\text{D}}^{20} = +9.92$  ( $c = 0.80$ ,  $\text{CH}_2\text{Cl}_2$ ); HPLC analysis Daicel Chiralcel AD-H column, *n*-hexane/*i*-PrOH = 80:20, flow rate = 1.0 mL/min,  $T = 25^\circ\text{C}$ , UV = 210 nm;  $t$  (minor) = 14.08 min,  $t$  (major) = 16.04 min;  $^1\text{H}$  NMR (400 MHz, Chloroform- $d$ )  $\delta$  7.16 (d,  $J = 8.2$  Hz, 2H), 6.80 (d,  $J = 8.3$  Hz, 2H), 4.25 (q,  $J = 7.1$  Hz, 2H), 3.99 (td,  $J = 9.4, 4.9$  Hz, 1H), 3.82 – 3.66 (m, 7H), 3.51 (s, 3H), 3.43 – 3.25 (m, 2H), 1.31 (t,  $J = 7.2$  Hz, 3H).  $^{13}\text{C}\{^1\text{H}\}$  NMR (100 MHz, Chloroform- $d$ )  $\delta$  191.8, 168.5, 167.9, 160.5, 158.8, 131.6, 129.1, 114.0, 62.5, 57.2, 55.2, 52.7, 52.5, 43.3, 39.3, 13.9. **HRMS (ESI)**: exact mass calcd for  $\text{C}_{18}\text{H}_{22}\text{NaO}_8^+$  ( $\text{M}+\text{Na}$ ) $^+$  requires  $m/z$  389.1207, found  $m/z$  389.1202.

**1,1-dimethyl 4-ethyl (*S*)-2-(biphenyl-4-yl)-4-oxobutane-1,1,4-tricarboxylate (3m)**

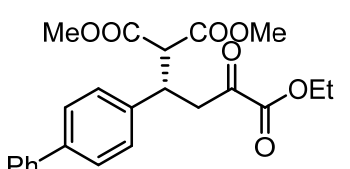 Yellow oil (84% yield, 89% ee);  $[\alpha]_{\text{D}}^{20} = +12.4$  ( $c = 0.70$ ,  $\text{CH}_2\text{Cl}_2$ ); HPLC analysis Daicel Chiralcel AD-H column, *n*-hexane/*i*-PrOH = 80:20, flow rate = 1.0 mL/min,  $T = 25^\circ\text{C}$ , UV = 210 nm;  $t$  (minor) = 15.32 min,  $t$  (major) = 19.43 min;  $^1\text{H}$  NMR (400 MHz, Chloroform- $d$ )  $\delta$  7.57 – 7.48 (m, 4H), 7.41 (dd,  $J = 8.5, 6.8$  Hz, 2H), 7.37 – 7.27 (m, 3H), 4.25 (m, 2H), 4.09 (td,  $J = 9.3, 5.0$  Hz, 1H), 3.82 (d,  $J = 9.8$  Hz, 1H), 3.75 (s, 3H), 3.57 – 3.43 (m, 4H), 3.35 (dd,  $J = 18.1, 5.0$  Hz, 1H), 1.31 (t,  $J = 7.1$  Hz, 3H).  $^{13}\text{C}\{^1\text{H}\}$  NMR (100 MHz, Chloroform- $d$ )  $\delta$  191.7, 168.4, 167.9, 160.5, 140.5, 140.3, 138.8, 128.8, 128.5, 127.4, 127.3, 127.0, 62.6, 56.9, 52.8, 52.5, 43.1, 39.6, 13.9. **HRMS (ESI)**: exact mass calcd for  $\text{C}_{23}\text{H}_{24}\text{NaO}_7^+$  ( $\text{M}+\text{Na}$ ) $^+$  requires  $m/z$  435.1414, found  $m/z$  435.1411.

### 1,1-dimethyl 4-ethyl (*S*)-2-(2-naphthalenyl)-4-oxobutane-1,1,4-tricarboxylate (**3n**)

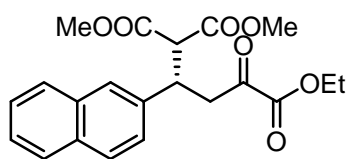

Yellow oil (93% yield, 90% ee);  $[\alpha]_{\text{D}}^{20} = +11.8$  ( $c = 1.00$ ,  $\text{CH}_2\text{Cl}_2$ );

HPLC analysis Daicel Chiralcel AD-H column, *n*-hexane/*i*-PrOH = 80:20, flow rate = 1.0 mL/min,  $T = 25^\circ\text{C}$ , UV = 210 nm;  $t$  (major) =

14.95 min,  $t$  (minor) = 16.87 min;  $^1\text{H NMR}$  (400 MHz, Chloroform-*d*)  $\delta$  7.78 (dd,  $J = 8.2, 3.4$  Hz, 3H), 7.70 (d,  $J = 2.0$  Hz, 1H), 7.50 – 7.41 (m, 2H), 7.38 (dd,  $J = 8.6, 1.9$  Hz, 1H), 4.21 (m, 3H), 3.90 (d,  $J = 10.1$  Hz, 1H), 3.75 (s, 3H), 3.54 (dd,  $J = 18.0, 8.8$  Hz, 1H), 3.49 – 3.31 (m, 4H), 1.26 (t,  $J = 7.1$  Hz, 3H).  $^{13}\text{C}\{^1\text{H}\}$  NMR (100 MHz, Chloroform-*d*)  $\delta$  191.7, 168.5, 167.8, 160.5, 137.3, 133.3, 132.7, 128.4, 127.9, 127.6, 127.1, 126.2, 126.0, 125.9, 62.5, 57.0, 52.8, 52.5, 43.1, 40.1, 13.9. **HRMS (ESI)**: exact mass calcd for  $\text{C}_{21}\text{H}_{22}\text{NaO}_7^+$  ( $\text{M}+\text{Na}$ ) $^+$  requires  $m/z$  409.1258, found  $m/z$  409.1255.

### 1,1-dimethyl 4-ethyl (*S*)-2-(2-thiophenyl)-4-oxobutane-1,1,4-tricarboxylate (**3o**)

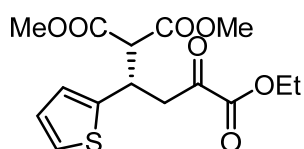

Yellow oil (96% yield, 92% ee);  $[\alpha]_{\text{D}}^{20} = +18.86$  ( $c = 1.60$ ,  $\text{CH}_2\text{Cl}_2$ );

HPLC analysis Daicel Chiralcel AD-H column, *n*-hexane/*i*-PrOH = 80:20, flow rate = 1.0 mL/min,  $T = 25^\circ\text{C}$ , UV = 210 nm;  $t$  (major) = 9.78

min,  $t$  (minor) = 11.48 min;  $^1\text{H NMR}$  (400 MHz, Chloroform-*d*)  $\delta$  7.15 (dd,  $J = 5.1, 1.3$  Hz, 1H), 6.92 (dd,  $J = 3.6, 1.4$  Hz, 1H), 6.88 (dd,  $J = 5.0, 3.5$  Hz, 1H), 4.37 (td,  $J = 8.7, 4.8$  Hz, 1H), 4.28 (q,  $J = 7.1$  Hz, 2H), 3.81 (d,  $J = 8.9$  Hz, 1H), 3.74 (d,  $J = 1.4$  Hz, 3H), 3.61 (d,  $J = 1.4$  Hz, 3H), 3.53 – 3.34 (m, 2H), 1.34 (t,  $J = 7.1$  Hz, 3H).  $^{13}\text{C}\{^1\text{H}\}$  NMR (100 MHz, Chloroform-*d*)  $\delta$  191.3, 168.1, 167.7, 160.4, 142.7, 126.7, 126.0, 124.6, 62.6, 57.4, 52.8, 52.7, 43.8, 35.2, 13.9. **HRMS (ESI)**: exact mass calcd for  $\text{C}_{15}\text{H}_{18}\text{NaO}_7\text{S}^+$  ( $\text{M}+\text{Na}$ ) $^+$  requires  $m/z$  365.0665, found  $m/z$  365.0663.

### Trimethyl (*S*)-2-(3-fluorophenyl)-4-oxobutane-1,1,4-tricarboxylate (**3aa**)<sup>2</sup>

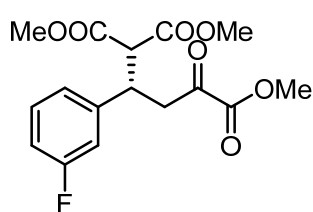

Yellow oil (92% yield, 83% ee);  $[\alpha]_{\text{D}}^{20} = +4.88$  ( $c = 1.00$ ,  $\text{CH}_2\text{Cl}_2$ );

HPLC analysis Daicel Chiralcel AD-H column, *n*-hexane/*i*-PrOH = 80:20, flow rate = 1.0 mL/min,  $T = 25^\circ\text{C}$ , UV = 210 nm;  $t$  (major) = 9.86 min,  $t$  (minor) = 13.25 min;  $^1\text{H NMR}$  (400 MHz, Chloroform-*d*)  $\delta$

7.27 – 7.22 (m, 1H), 7.04 (m, 1H), 7.00 – 6.88 (m, 2H), 4.04 (td,  $J = 9.1, 5.2$  Hz, 1H), 3.82 (s, 3H), 3.75 (d,  $J = 8.7$  Hz, 4H), 3.53 (s, 3H), 3.46 – 3.31 (m, 2H).  $^{13}\text{C}\{^1\text{H}\}$  NMR (100 MHz, Chloroform-*d*)

$\delta$  190.9, 168.2, 167.6, 164.0, 161.5, 160.8, 142.4, 142.3, 130.2, 130.1, 123.8, 123.7, 115.2, 115.0, 114.6, 114.4, 56.7, 53.1, 52.8, 52.6, 43.0, 39.5.

**Trimethyl (*S*)-2-(3-chlorophenyl)-4-oxobutane-1,1,4-tricarboxylate (3ab)<sup>2</sup>**

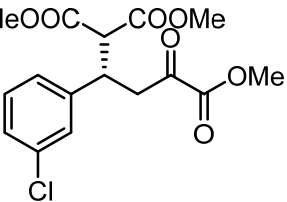 Yellow oil (92% yield, 90% ee);  $[\alpha]_{\text{D}}^{20} = +8.96$  ( $c = 0.80$ ,  $\text{CH}_2\text{Cl}_2$ ); HPLC analysis Daicel Chiralcel AD-H column, *n*-hexane/*i*-PrOH = 80:20, flow rate = 1.0 mL/min,  $T = 25^\circ\text{C}$ , UV = 210 nm;  $t$  (major) = 9.71 min,  $t$  (minor) = 12.94 min;  $^1\text{H}$  NMR (400 MHz, Chloroform-*d*)  $\delta$  7.27 – 7.13 (m, 4H), 4.01 (m, 1H), 3.83 (s, 3H), 3.74 (d,  $J = 5.6$  Hz, 4H), 3.54 (s, 3H), 3.46 – 3.30 (m, 2H).  $^{13}\text{C}\{^1\text{H}\}$  NMR (100 MHz, Chloroform-*d*)  $\delta$  190.9, 168.2, 167.6, 160.7, 141.9, 134.4, 129.9, 128.2, 127.8, 126.4, 56.6, 53.1, 52.9, 52.6, 42.9, 39.5.

**Trimethyl (*S*)-2-(3-bromophenyl)-4-oxobutane-1,1,4-tricarboxylate (3ac)<sup>3</sup>**

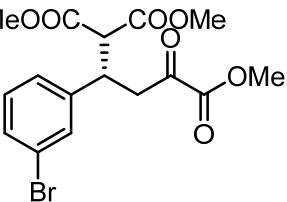 Yellow oil (90% yield, 91% ee);  $[\alpha]_{\text{D}}^{20} = +14.4$  ( $c = 1.20$ ,  $\text{CH}_2\text{Cl}_2$ ); HPLC analysis Daicel Chiralcel AD-H column, *n*-hexane/*i*-PrOH = 80:20, flow rate = 1.0 mL/min,  $T = 25^\circ\text{C}$ , UV = 210 nm;  $t$  (major) = 9.58 min,  $t$  (minor) = 11.99 min;  $^1\text{H}$  NMR (400 MHz, Chloroform-*d*)  $\delta$  7.45 – 7.32 (m, 2H), 7.23 – 7.11 (m, 2H), 4.06 – 3.95 (m, 1H), 3.83 (s, 3H), 3.73 (d,  $J = 6.6$  Hz, 4H), 3.54 (s, 3H), 3.46 – 3.30 (m, 2H).  $^{13}\text{C}\{^1\text{H}\}$  NMR (100 MHz, Chloroform-*d*)  $\delta$  190.9, 168.2, 167.6, 160.7, 142.2, 131.1, 130.7, 130.2, 126.9, 122.6, 56.6, 53.1, 52.9, 52.6, 42.9, 39.4.

**Trimethyl (*S*)-2-(3-methylphenyl)-4-oxobutane-1,1,4-tricarboxylate (3ad)<sup>4</sup>**

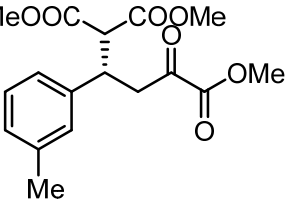 Yellow oil (93% yield, 90% ee);  $[\alpha]_{\text{D}}^{20} = +16.82$  ( $c = 0.50$ ,  $\text{CH}_2\text{Cl}_2$ ); HPLC analysis Daicel Chiralcel AD-H column, *n*-hexane/*i*-PrOH = 80:20, flow rate = 1.0 mL/min,  $T = 25^\circ\text{C}$ , UV = 210 nm;  $t$  (major) = 10.01 min,  $t$  (minor) = 12.19 min;  $^1\text{H}$  NMR (400 MHz, Chloroform-*d*)  $\delta$  7.19 – 7.13 (t,  $J = 7.5$  Hz, 1H), 7.11 – 6.96 (dd,  $J = 9.6, 4.5$  Hz, 3H), 4.04 – 3.97 (td,  $J = 9.0, 5.3$  Hz, 1H), 3.85 – 3.79 (s, 3H), 3.75 – 3.71 (d,  $J = 4.8$  Hz, 3H), 3.56 – 3.48 (s, 3H), 3.45 – 3.29 (m, 2H), 2.38 – 2.18 (s, 3H).  $^{13}\text{C}\{^1\text{H}\}$  NMR (100 MHz, Chloroform-*d*)  $\delta$  191.2, 168.5, 167.8, 160.8, 139.7,



138.2, 128.7, 128.4, 128.2, 124.8, 57.0, 53.0, 52.7, 52.4, 43.1, 39.8, 21.4.

**Trimethyl (*S*)-2-(3-methoxyphenyl)-4-oxobutane-1,1,4-tricarboxylate (3ae)**

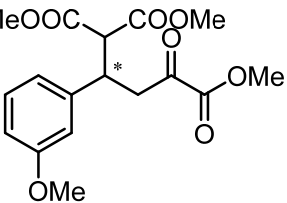 Yellow oil (86% yield, 86% ee);  $[\alpha]_{\text{D}}^{20} = +30.51$  ( $c = 1.20$ ,  $\text{CH}_2\text{Cl}_2$ ); HPLC analysis Daicel Chiralcel AD-H column, *n*-hexane/*i*-PrOH = 80:20, flow rate = 1.0 mL/min,  $T = 25^\circ\text{C}$ , UV = 210 nm;  $t$  (major) = 13.36 min,  $t$  (minor) = 18.05 min;  $^1\text{H}$  NMR (400 MHz, Chloroform-*d*)  $\delta$  7.17 – 7.05 (t,  $J = 7.9$  Hz, 1H), 6.85 – 6.58 (m, 3H), 4.01 – 3.88 (td,  $J = 9.0, 5.1$  Hz, 1H), 3.79 – 3.72 (s, 3H), 3.72 – 3.69 (s, 3H), 3.67 – 3.61 (s, 3H), 3.53 – 3.40 (s, 3H), 3.40 – 3.21 (m, 2H).  $^{13}\text{C}\{^1\text{H}\}$  NMR (100 MHz, Chloroform-*d*)  $\delta$  191.2, 168.4, 167.8, 160.8, 159.6, 141.3, 129.6, 120.1, 113.9, 112.8, 56.9, 55.2, 53.0, 52.8, 52.5, 43.1, 39.9. HRMS (ESI): exact mass calcd for  $\text{C}_{17}\text{H}_{20}\text{NaO}_8^+$  ( $\text{M}+\text{Na}$ ) $^+$  requires  $m/z$  375.1050, found  $m/z$  375.1055.

**Trimethyl (*S*)-2-(4-bromophenyl)-4-oxobutane-1,1,4-tricarboxylate (3af)<sup>4</sup>**

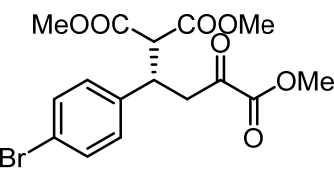 Yellow oil (95% yield, 91% ee);  $[\alpha]_{\text{D}}^{20} = +16.94$  ( $c = 1.00$ ,  $\text{CH}_2\text{Cl}_2$ ); HPLC analysis Daicel Chiralcel AD-H column, *n*-hexane/*i*-PrOH = 80:20, flow rate = 1.0 mL/min,  $T = 25^\circ\text{C}$ , UV = 210 nm;  $t$  (minor) = 14.31 min,  $t$  (major) = 15.69 min;  $^1\text{H}$  NMR (400 MHz, Chloroform-*d*)  $\delta$  7.39 – 7.27 (m, 2H), 7.11 – 7.02 (m, 2H), 3.93 (m,  $J = 9.9, 8.7, 5.0$  Hz, 1H), 3.74 (s, 3H), 3.70 – 3.62 (m, 4H), 3.45 (s, 3H), 3.37 – 3.21 (m, 2H).  $^{13}\text{C}\{^1\text{H}\}$  NMR (100 MHz, Chloroform-*d*)  $\delta$  189.9, 167.2, 166.6, 159.7, 137.8, 130.7, 128.8, 120.4, 55.6, 52.1, 51.8, 51.6, 42.0, 38.3.

**Trimethyl (*S*)-2-(4-methylphenyl)-4-oxobutane-1,1,4-tricarboxylate (3ag)<sup>3</sup>**

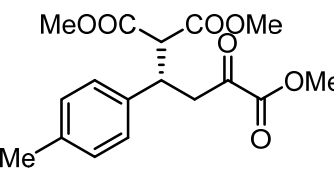 Yellow oil (94% yield, 90% ee);  $[\alpha]_{\text{D}}^{20} = +5.08$  ( $c = 0.50$ ,  $\text{CH}_2\text{Cl}_2$ ); HPLC analysis Daicel Chiralcel AD-H column, *n*-hexane/*i*-PrOH = 90:10, flow rate = 1.0 mL/min,  $T = 25^\circ\text{C}$ , UV = 210 nm;  $t$  (major) = 20.39 min,  $t$  (minor) = 22.15 min;  $^1\text{H}$  NMR (400 MHz, Chloroform-*d*)  $\delta$  7.15 – 7.10 (m, 2H), 7.07 (d,  $J = 8.0$  Hz, 2H), 4.01 (m,  $J = 9.9, 8.6, 5.1$  Hz, 1H), 3.80 (s, 3H), 3.74 (d,  $J = 11.9$  Hz, 4H), 3.51 (s, 3H), 3.44 – 3.28 (m, 2H), 2.28 (s, 3H).  $^{13}\text{C}\{^1\text{H}\}$  NMR (100 MHz, Chloroform-*d*)  $\delta$  191.3, 168.5,

167.9, 160.9, 137.1, 136.6, 129.3, 127.8, 57.1, 53.0, 52.8, 52.5, 43.3, 39.5, 21.1.

**Trimethyl (*S*)-2-(4-methoxyphenyl)-4-oxobutane-1,1,4-tricarboxylate (3ah)<sup>2</sup>**

Yellow oil (87% yield, 82% ee);  $[\alpha]_{\text{D}}^{20} = +9.92$  ( $c = 0.80$ ,  $\text{CH}_2\text{Cl}_2$ );  
HPLC analysis Daicel Chiralcel AD-H column, *n*-hexane/*i*-PrOH  
= 80:20, flow rate = 1.0 mL/min,  $T = 25^\circ\text{C}$ , UV = 210 nm;  $t$  (minor)  
= 17.61 min,  $t$  (major) = 19.74 min;  $^1\text{H}$  NMR (400 MHz, Chloroform-*d*)  $\delta$  7.20 – 7.12 (m, 2H),  
6.84 – 6.76 (m, 2H), 4.00 (m,  $J = 10.0, 8.7, 5.0$  Hz, 1H), 3.80 (s, 3H), 3.76 (s, 3H), 3.75 – 3.68 (m,  
4H), 3.51 (s, 3H), 3.43 – 3.27 (m, 2H).  $^{13}\text{C}\{^1\text{H}\}$  NMR (100 MHz, Chloroform-*d*)  $\delta$  191.4, 168.5,  
167.9, 160.9, 158.8, 131.6, 129.1, 114.0, 57.2, 55.2, 53.0, 52.8, 52.5, 43.4, 39.2, 29.7.

**Trimethyl (*S*)-2-(biphenyl-4-yl)-4-oxobutane-1,1,4-tricarboxylate (3ai)<sup>4</sup>**

Yellow oil (88% yield, 86% ee);  $[\alpha]_{\text{D}}^{20} = +16.06$  ( $c = 0.40$ ,  $\text{CH}_2\text{Cl}_2$ );  
HPLC analysis Daicel Chiralcel AD-H column, *n*-hexane/*i*-PrOH =  
80:20, flow rate = 1.0 mL/min,  $T = 25^\circ\text{C}$ , UV = 210 nm;  $t$  (minor) =  
17.90 min;  $t$  (major) = 24.13 min;  $^1\text{H}$  NMR (400 MHz, Chloroform-*d*)  $\delta$  7.60 – 7.48 (m, 4H), 7.42  
(dd,  $J = 8.4, 6.7$  Hz, 2H), 7.33 (t,  $J = 7.8$  Hz, 3H), 4.09 (td,  $J = 9.1, 5.0$  Hz, 1H), 3.82 (d,  $J = 7.1$  Hz,  
4H), 3.75 (s, 3H), 3.57 – 3.33 (m, 5H).  $^{13}\text{C}\{^1\text{H}\}$  NMR (100 MHz, Chloroform-*d*)  $\delta$  191.3, 168.5,  
167.9, 160.8, 140.5, 140.3, 138.8, 128.8, 128.5, 127.4, 127.3, 127.0, 56.9, 53.1, 52.9, 52.6, 43.2, 39.6.

**Trimethyl (*S*)-2-(2-naphthalenyl)-4-oxobutane-1,1,4-tricarboxylate (3aj)<sup>2</sup>**

Yellow oil (89% yield, 91% ee);  $[\alpha]_{\text{D}}^{20} = +12.12$  ( $c = 1.00$ ,  $\text{CH}_2\text{Cl}_2$ );  
HPLC analysis Daicel Chiralcel AD-H column, *n*-hexane/*i*-PrOH =  
80:20, flow rate = 1.0 mL/min,  $T = 25^\circ\text{C}$ , UV = 210 nm;  $t$  (major) =  
17.12 min;  $t$  (minor) = 19.15 min;  $^1\text{H}$  NMR (400 MHz, Chloroform-*d*)  $\delta$  7.82 – 7.75 (m, 3H), 7.70  
(d,  $J = 1.9$  Hz, 1H), 7.48 – 7.42 (m, 2H), 7.38 (dd,  $J = 8.5, 1.9$  Hz, 1H), 4.26 – 4.18 (m, 1H), 3.89 (d,  
 $J = 9.7$  Hz, 1H), 3.76 (s, 3H), 3.74 (s, 3H), 3.54 (dd,  $J = 18.1, 8.7$  Hz, 1H), 3.48 – 3.37 (m, 4H).  
 $^{13}\text{C}\{^1\text{H}\}$  NMR (100 MHz, Chloroform-*d*)  $\delta$  191.2, 168.5, 167.8, 160.9, 137.3, 133.3, 132.7, 128.4,  
127.9, 127.6, 127.1, 126.2, 126.0, 125.9, 57.0, 53.0, 52.8, 52.5, 43.2, 40.0.

### Trimethyl (*S*)-2-(2-thiophenyl)-4-oxobutane-1,1,4-tricarboxylate (**3ak**)<sup>2</sup>

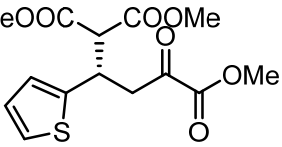 Yellow oil (96% yield, 92% ee);  $[\alpha]_{\text{D}}^{20} = +9.44$  ( $c = 0.50$ ,  $\text{CH}_2\text{Cl}_2$ );  
HPLC analysis Daicel Chiralcel AD-H column, *n*-hexane/*i*-PrOH = 80:20, flow rate = 1.0 mL/min,  $T = 25^\circ\text{C}$ , UV = 210 nm;  $t$  (major) = 11.44 min;  $t$  (minor) = 13.63 min;  $^1\text{H}$  NMR (400 MHz, Chloroform-*d*)  $\delta$  7.15 (dd,  $J = 5.1, 1.3$  Hz, 1H), 6.93 – 6.86 (m, 2H), 4.37 (td,  $J = 8.6, 4.9$  Hz, 1H), 3.86 – 3.79 (m, 4H), 3.74 (s, 3H), 3.61 (s, 3H), 3.54 – 3.36 (m, 2H).  $^{13}\text{C}\{^1\text{H}\}$  NMR (100 MHz, Chloroform-*d*)  $\delta$  190.9, 168.1, 167.7, 160.8, 142.6, 126.8, 126.0, 124.6, 57.4, 53.1, 52.8, 52.7, 43.9, 35.2.

### 1,1-dimethyl 4-isopropyl (*S*)-2-(3-chlorophenyl)-4-oxobutane-1,1,4-tricarboxylate (**3al**)

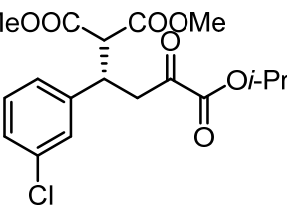 Yellow oil (93% yield, 90% ee);  $[\alpha]_{\text{D}}^{20} = +16.90$  ( $c = 0.90$ ,  $\text{CH}_2\text{Cl}_2$ );  
HPLC analysis Daicel Chiralcel AD-H column, *n*-hexane/*i*-PrOH = 90:10, flow rate = 1.0 mL/min,  $T = 25^\circ\text{C}$ , UV = 210 nm;  $t$  (major) = 10.21 min;  $t$  (minor) = 12.41 min;  $^1\text{H}$  NMR (400 MHz, Chloroform-*d*)  $\delta$  7.25 (t,  $J = 2.0$  Hz, 1H), 7.23 – 7.17 (m, 2H), 7.15 (dt,  $J = 6.8, 2.0$  Hz, 1H), 5.08 (p,  $J = 6.3$  Hz, 1H), 4.01 (m, 1H), 3.80 – 3.68 (m, 4H), 3.53 (s, 3H), 3.44 – 3.27 (m, 2H), 1.31 (dd,  $J = 6.3, 5.4$  Hz, 6H).  $^{13}\text{C}\{^1\text{H}\}$  NMR (100 MHz, Chloroform-*d*)  $\delta$  191.7, 168.2, 167.6, 159.9, 141.9, 134.4, 129.9, 128.3, 127.7, 126.4, 71.0, 56.7, 52.9, 52.6, 42.8, 39.6, 21.5, 21.5. **HRMS (ESI)**: exact mass calcd for  $\text{C}_{18}\text{H}_{21}\text{ClNaO}_7^+$  ( $\text{M}+\text{Na}$ )<sup>+</sup> requires  $m/z$  407.0868, found  $m/z$  407.0863.

### 1,1-dimethyl 4-isopropyl (*S*)-2-(4-methylphenyl)-4-oxobutane-1,1,4-tricarboxylate (**3am**)

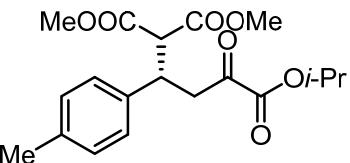 Yellow oil (93% yield, 90% ee);  $[\alpha]_{\text{D}}^{20} = +29.8$  ( $c = 1.60$ ,  $\text{CH}_2\text{Cl}_2$ );  
HPLC analysis Daicel Chiralcel IB column, *n*-hexane/*i*-PrOH = 95:5, flow rate = 1.0 mL/min,  $T = 25^\circ\text{C}$ , UV = 210 nm;  $t$  (major) = 7.91 min;  $t$  (minor) = 8.81 min;  $^1\text{H}$  NMR (400 MHz, Chloroform-*d*)  $\delta$  7.12 (d,  $J = 8.1$  Hz, 2H), 7.07 (d,  $J = 7.9$  Hz, 2H), 5.05 (p,  $J = 6.2$  Hz, 1H), 4.05 – 3.95 (m, 1H), 3.79 – 3.68 (m, 4H), 3.50 (d,  $J = 1.1$  Hz, 3H), 3.42 – 3.24 (m, 2H), 2.28 (s, 3H), 1.30 – 1.26 (m, 6H).  $^{13}\text{C}\{^1\text{H}\}$  NMR (100 MHz, Chloroform-*d*)  $\delta$  192.1, 168.5, 167.9, 160.1, 137.1, 136.7, 129.3, 127.9, 70.8, 57.1, 52.8, 52.5, 43.2,

39.7, 21.5, 21.5, 21.1. **HRMS (ESI)**: exact mass calcd for  $C_{19}H_{24}NaO_7^+$  ( $M+Na$ ) $^+$  requires  $m/z$  387.1414, found  $m/z$  387.1410.

**1,1-dimethyl 4-isopropyl (*S*)-2-(biphenyl-4-yl)-4-oxobutane-1,1,4-tricarboxylate (3an)**

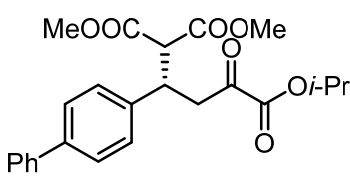 Yellow oil (90% yield, 86% ee);  $[\alpha]_D^{20} = +18.98$  ( $c = 1.00$ ,  $CH_2Cl_2$ );  
HPLC analysis Daicel Chiralcel AD-H column, *n*-hexane/*i*-PrOH = 90:10, flow rate = 1.0 mL/min,  $T = 25^\circ C$ , UV = 210 nm;  $t$  (minor) = 12.14 min;  $t$  (major) = 20.89 min;  $^1H$  NMR (400 MHz, Chloroform-*d*)  $\delta$  7.57 – 7.49 (m, 4H), 7.44 – 7.39 (m, 2H), 7.36 – 7.30 (m, 3H), 5.06 (p,  $J = 6.3$  Hz, 1H), 4.12 – 4.05 (m, 1H), 3.82 (d,  $J = 9.9$  Hz, 1H), 3.75 (s, 3H), 3.52 (s, 3H), 3.46 (dd,  $J = 18.0, 8.9$  Hz, 1H), 3.33 (dd,  $J = 18.0, 4.9$  Hz, 1H), 1.29 (dd,  $J = 8.7, 6.3$  Hz, 6H).  $^{13}C\{^1H\}$  NMR (100 MHz, Chloroform-*d*)  $\delta$  192.0, 168.4, 167.9, 160.1, 140.5, 140.2, 138.8, 128.8, 128.5, 127.4, 127.3, 127.0, 70.9, 57.0, 52.9, 52.6, 43.1, 39.7, 21.6, 21.5. **HRMS (ESI)**: exact mass calcd for  $C_{24}H_{26}NaO_7^+$  ( $M+Na$ ) $^+$  requires  $m/z$  449.1571, found  $m/z$  449.1566.

**1,1-dimethyl 4-isopropyl (*S*)-2-(2-naphthalenyl)-4-oxobutane-1,1,4-tricarboxylate (3ao)**

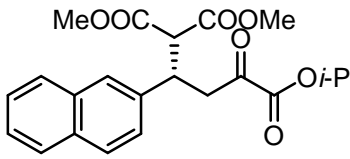 Yellow oil (85% yield, 87% ee);  $[\alpha]_D^{20} = +6.51$  ( $c = 0.90$ ,  $CH_2Cl_2$ );  
HPLC analysis Daicel Chiralcel AD-H column, *n*-hexane/*i*-PrOH = 90:10, flow rate = 1.0 mL/min,  $T = 25^\circ C$ , UV = 210 nm;  $t$  (major) = 17.97 min;  $t$  (minor) = 19.54 min;  $^1H$  NMR (400 MHz, Chloroform-*d*)  $\delta$  7.85 – 7.74 (m, 3H), 7.71 (d,  $J = 1.8$  Hz, 1H), 7.50 – 7.41 (m, 2H), 7.39 (dd,  $J = 8.5, 1.8$  Hz, 1H), 5.02 (p,  $J = 6.3$  Hz, 1H), 4.22 (td,  $J = 9.4, 4.8$  Hz, 1H), 3.90 (d,  $J = 10.0$  Hz, 1H), 3.75 (s, 3H), 3.52 (dd,  $J = 18.0, 9.0$  Hz, 1H), 3.45 (s, 3H), 3.37 (dd,  $J = 18.0, 4.8$  Hz, 1H), 1.26 (d,  $J = 5.8$  Hz, 3H), 1.22 (d,  $J = 6.2$  Hz, 3H).  $^{13}C\{^1H\}$  NMR (100 MHz, Chloroform-*d*)  $\delta$  192.0, 168.5, 167.8, 160.1, 137.3, 133.3, 132.7, 128.4, 127.9, 127.6, 127.2, 126.2, 126.0, 125.9, 70.8, 57.0, 52.9, 52.5, 43.1, 40.2, 21.5, 21.5. **HRMS (ESI)**: exact mass calcd for  $C_{22}H_{24}NaO_7^+$  ( $M+Na$ ) $^+$  requires  $m/z$  423.1414, found  $m/z$  423.1411.

**1,1-dimethyl 4-isopropyl (*S*)-2-(2-thiophenyl)-4-oxobutane-1,1,4-tricarboxylate (3ap)**

MeOOC

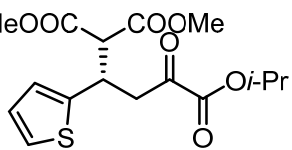

Yellow oil (93% yield, 90% ee);  $[\alpha]_{\text{D}}^{20} = +8.11$  ( $c = 0.90$ ,  $\text{CH}_2\text{Cl}_2$ );

HPLC analysis Daicel Chiralcel AD-H column, *n*-hexane/*i*-PrOH = 90:10, flow rate = 1.0 mL/min,  $T = 25^\circ\text{C}$ , UV = 210 nm;  $t$  (major) =

12.00 min;  $t$  (minor) = 14.31 min;  $^1\text{H NMR}$  (400 MHz, Chloroform-*d*)  $\delta$  7.15 (dd,  $J = 5.1, 1.3$  Hz, 1H), 6.96 – 6.85 (m, 2H), 5.09 (p,  $J = 6.3$  Hz, 1H), 4.37 (td,  $J = 8.8, 4.8$  Hz, 1H), 3.81 (d,  $J = 9.0$  Hz, 1H), 3.74 (s, 3H), 3.60 (s, 3H), 3.52 – 3.31 (m, 2H), 1.31 (dd,  $J = 6.3, 3.3$  Hz, 6H).  $^{13}\text{C}\{^1\text{H}\}$  NMR (100 MHz, Chloroform-*d*)  $\delta$  191.7, 168.1, 167.7, 160.0, 142.7, 126.8, 126.0, 124.6, 70.9, 57.4, 52.8, 52.7, 43.8, 35.3, 21.5. **HRMS (ESI)**: exact mass calcd for  $\text{C}_{16}\text{H}_{20}\text{NaO}_7\text{S}^+$  ( $\text{M}+\text{Na}$ ) $^+$  requires  $m/z$  379.0822, found  $m/z$  379.0817.

## 2. NMR Spectra of the Products

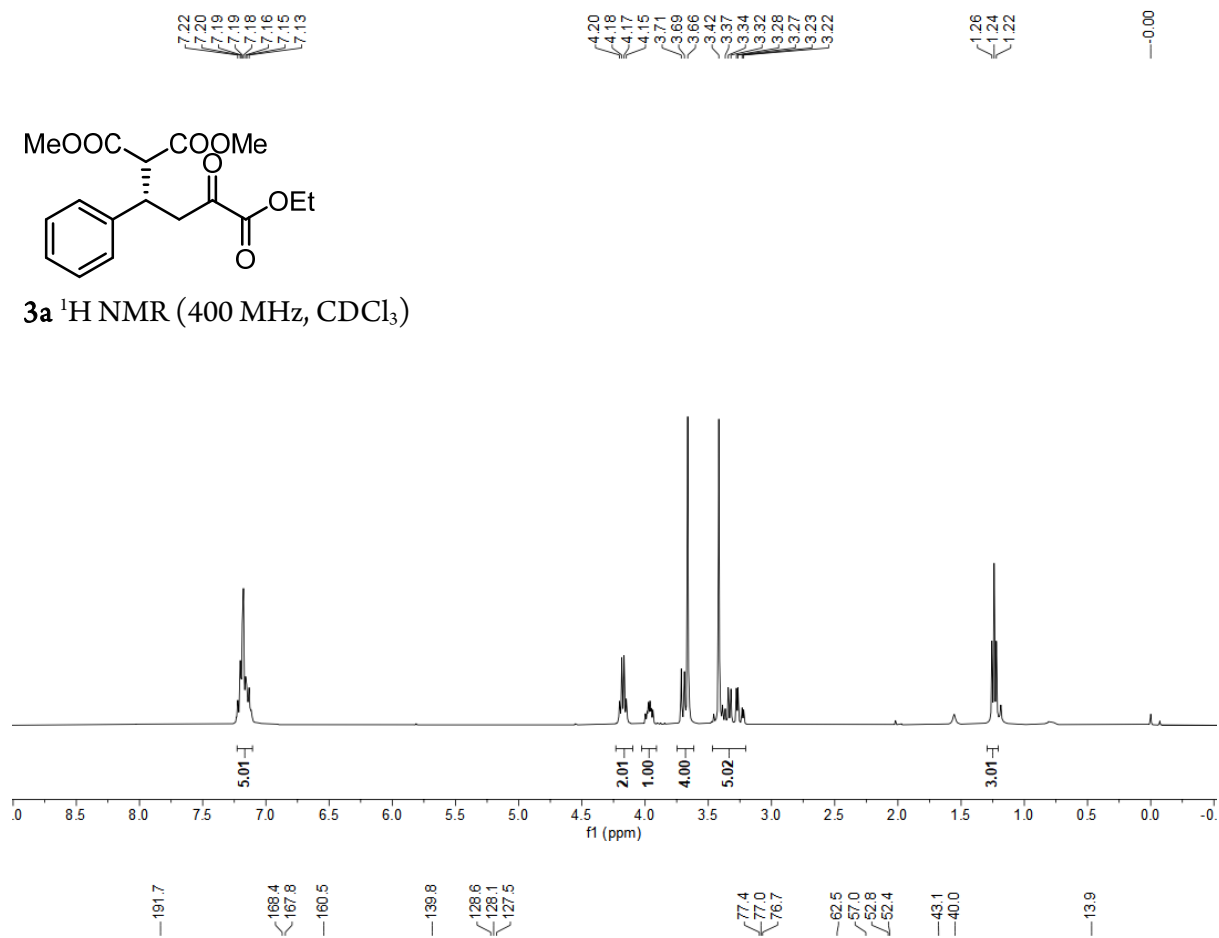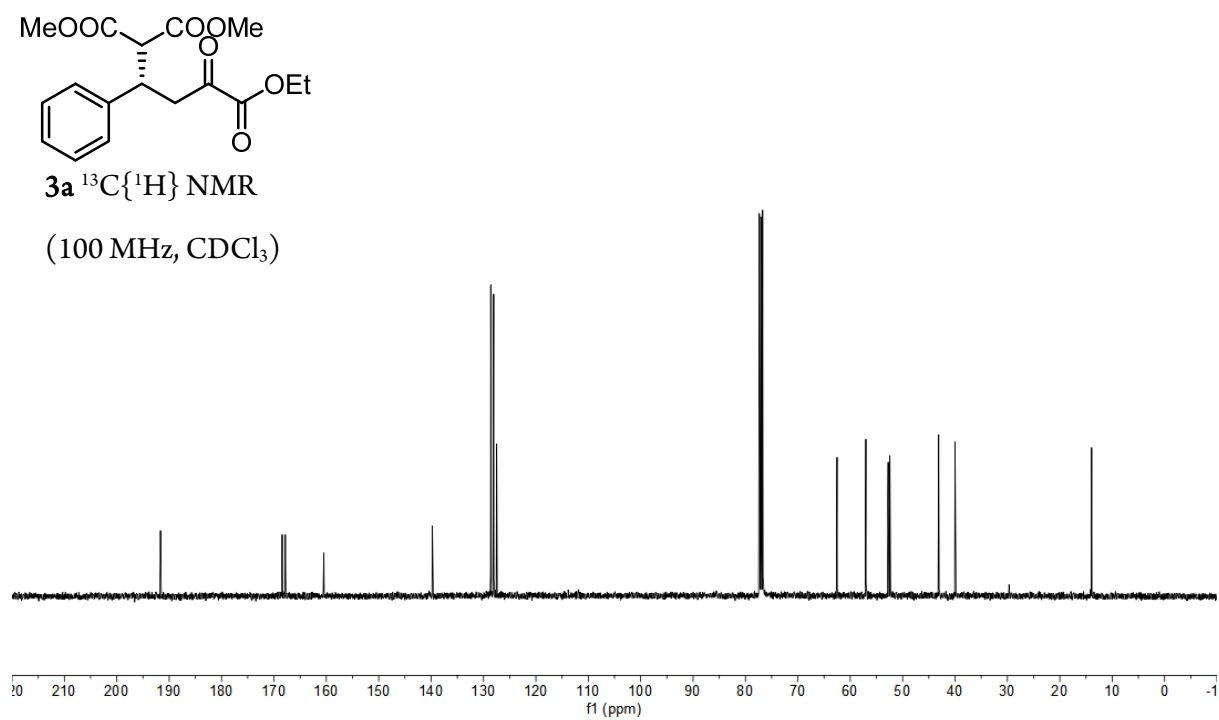

7.29  
7.27  
7.26  
7.25  
7.24  
7.23  
7.22  
7.21  
7.20  
7.19  
7.18  
4.27  
4.25  
4.23  
4.22  
4.21  
4.19  
4.17  
4.15  
4.04  
4.02  
4.01  
4.01  
4.00  
4.00  
3.96  
3.96  
3.94  
3.94  
3.93  
3.92  
3.91  
3.90  
3.75  
3.74  
3.72  
3.72  
3.45  
3.44  
3.43  
3.40  
3.40  
3.38  
3.38  
3.34  
3.34  
3.33  
3.32  
3.29  
3.29  
3.28  
1.33  
1.32  
1.31  
1.30  
1.29  
1.28  
1.27  
1.26  
1.25  
1.24  
1.24  
1.01  
1.01  
0.99  
0.98  
0.97  
0.00

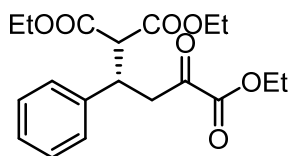

**3b**  $^1\text{H}$  NMR (400 MHz,  $\text{CDCl}_3$ )

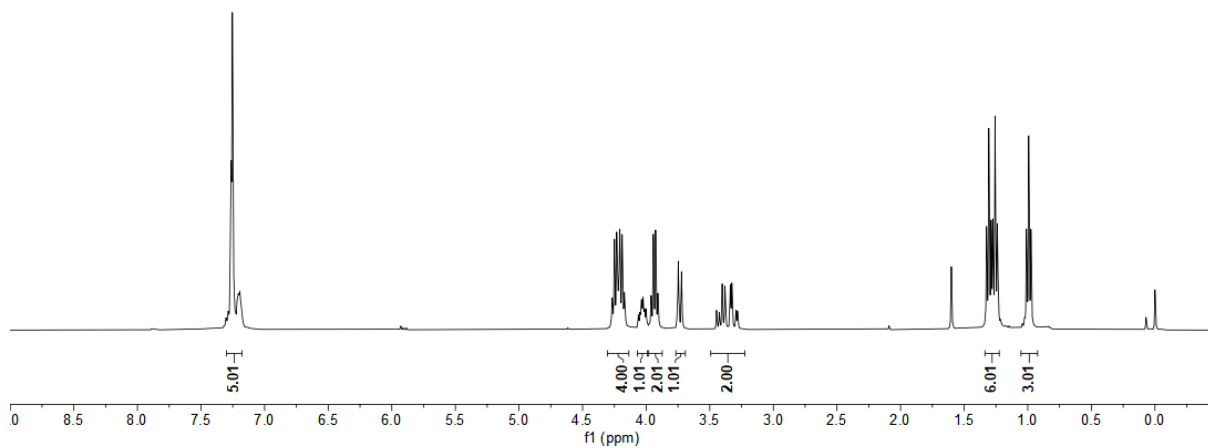

191.7  
168.1  
167.4  
160.5  
139.9  
128.5  
128.2  
127.4  
77.3  
77.0  
76.7  
62.5  
61.8  
61.4  
57.3  
43.4  
40.0  
14.0  
13.9  
13.7

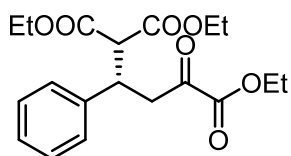

**3b**  $^{13}\text{C}\{^1\text{H}\}$  NMR

(100 MHz,  $\text{CDCl}_3$ )

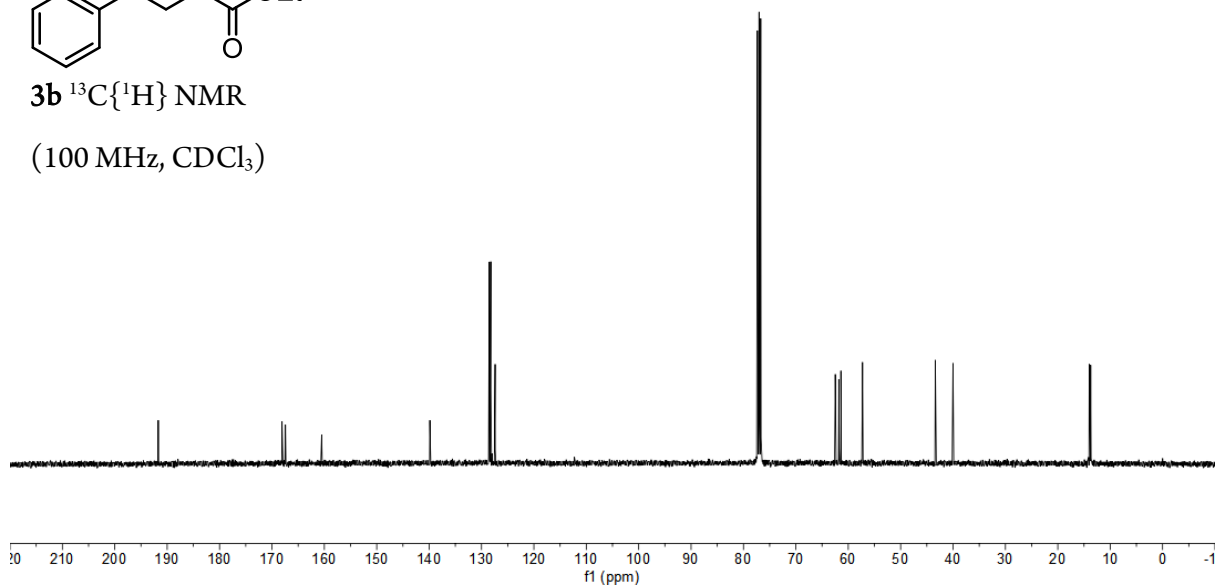

7.27  
7.26  
7.26  
7.25  
7.25  
7.22  
7.21  
7.19  
7.18  
7.17  
5.07  
5.05  
5.05  
5.04  
5.03  
4.78  
4.78  
4.77  
4.76  
4.75  
4.75  
4.26  
4.24  
4.24  
4.23  
4.21  
4.02  
4.01  
4.00  
3.99  
3.99  
3.98  
3.97  
3.69  
3.69  
3.67  
3.66  
3.42  
3.38  
3.37  
3.36  
3.35  
3.33  
3.33  
3.32  
3.31  
3.29  
3.28  
3.27  
1.32  
1.32  
1.30  
1.30  
1.29  
1.28  
1.25  
1.25  
1.24  
1.23  
1.22  
1.22  
1.04  
1.04  
1.02  
1.02  
0.96  
0.96  
0.94  
0.94  
0.00  
0.00

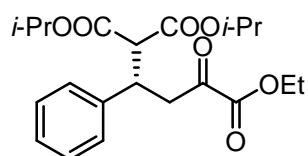

**3c**  $^1\text{H}$  NMR (400 MHz,  $\text{CDCl}_3$ )

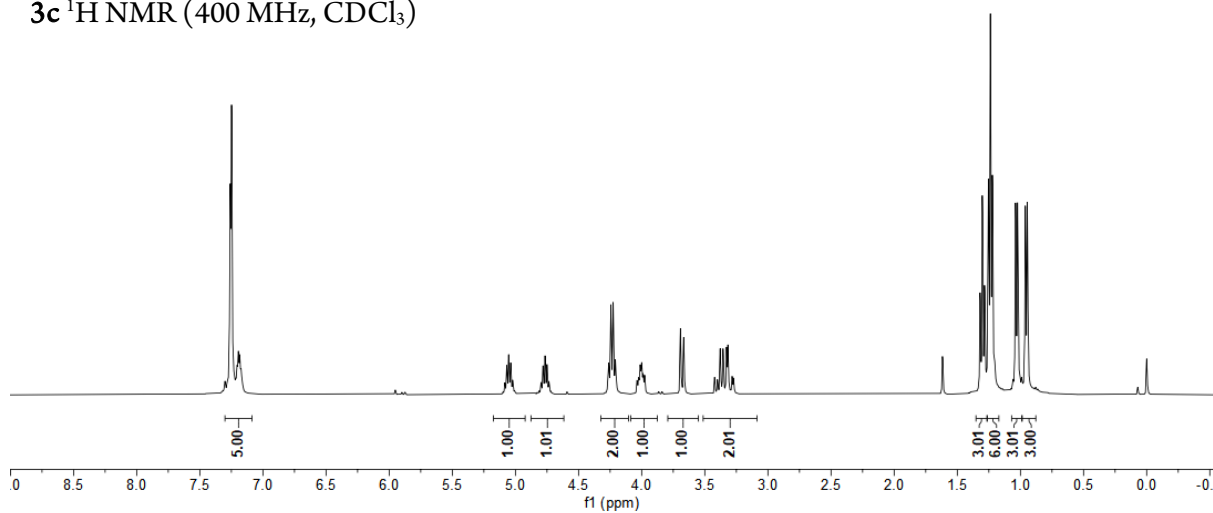

191.7  
167.7  
166.9  
160.5  
139.9  
128.5  
128.4  
128.4  
127.3  
77.3  
77.0  
76.7  
69.4  
68.9  
62.4  
57.5  
43.7  
39.9  
21.6  
21.5  
21.3  
21.2  
13.9

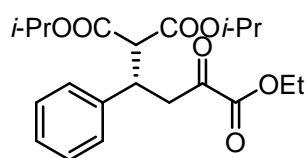

**3c**  $^{13}\text{C}\{^1\text{H}\}$  NMR

(100 MHz,  $\text{CDCl}_3$ )

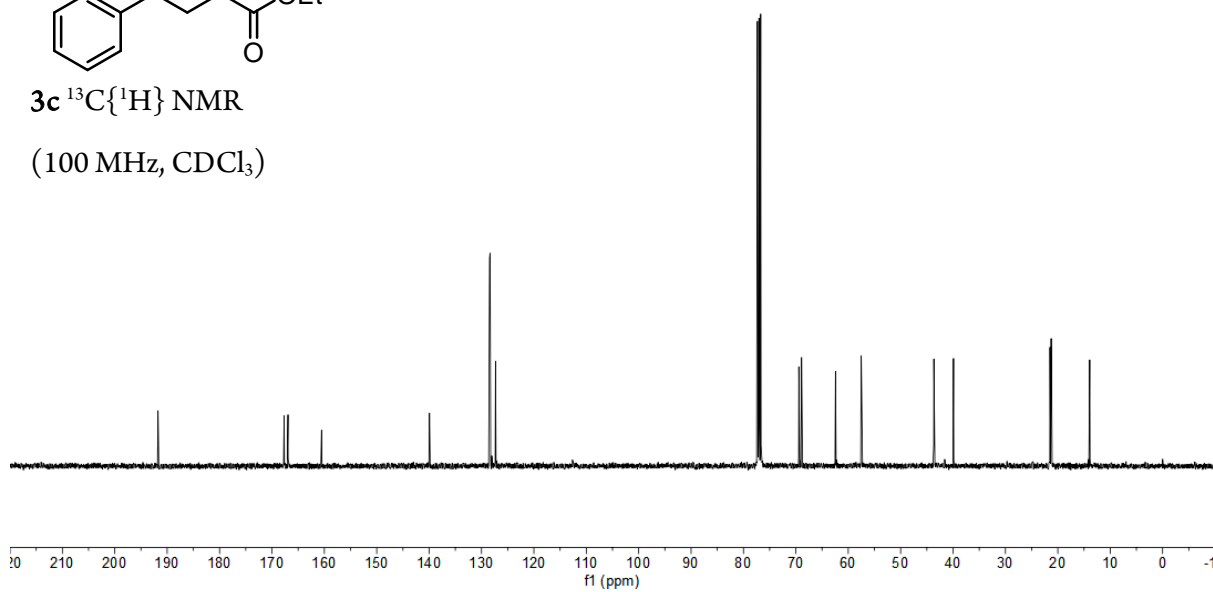



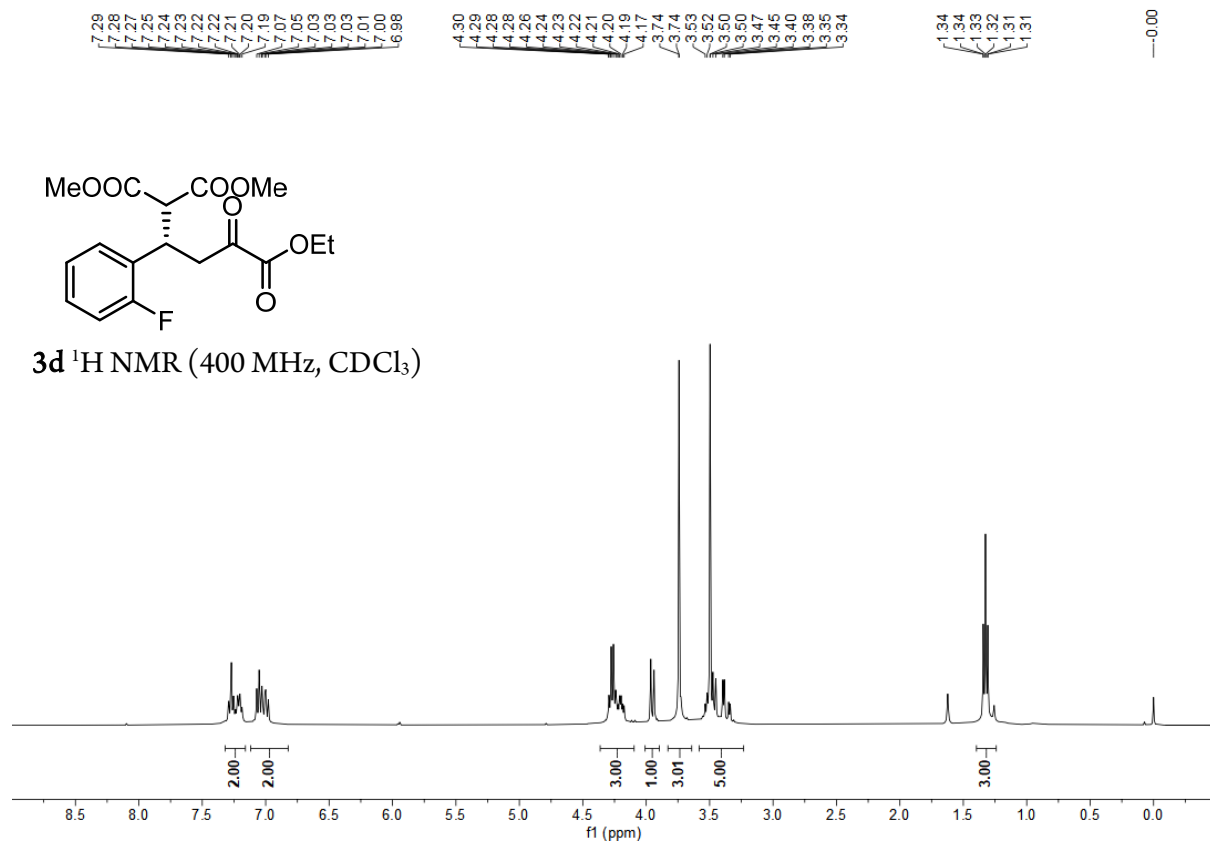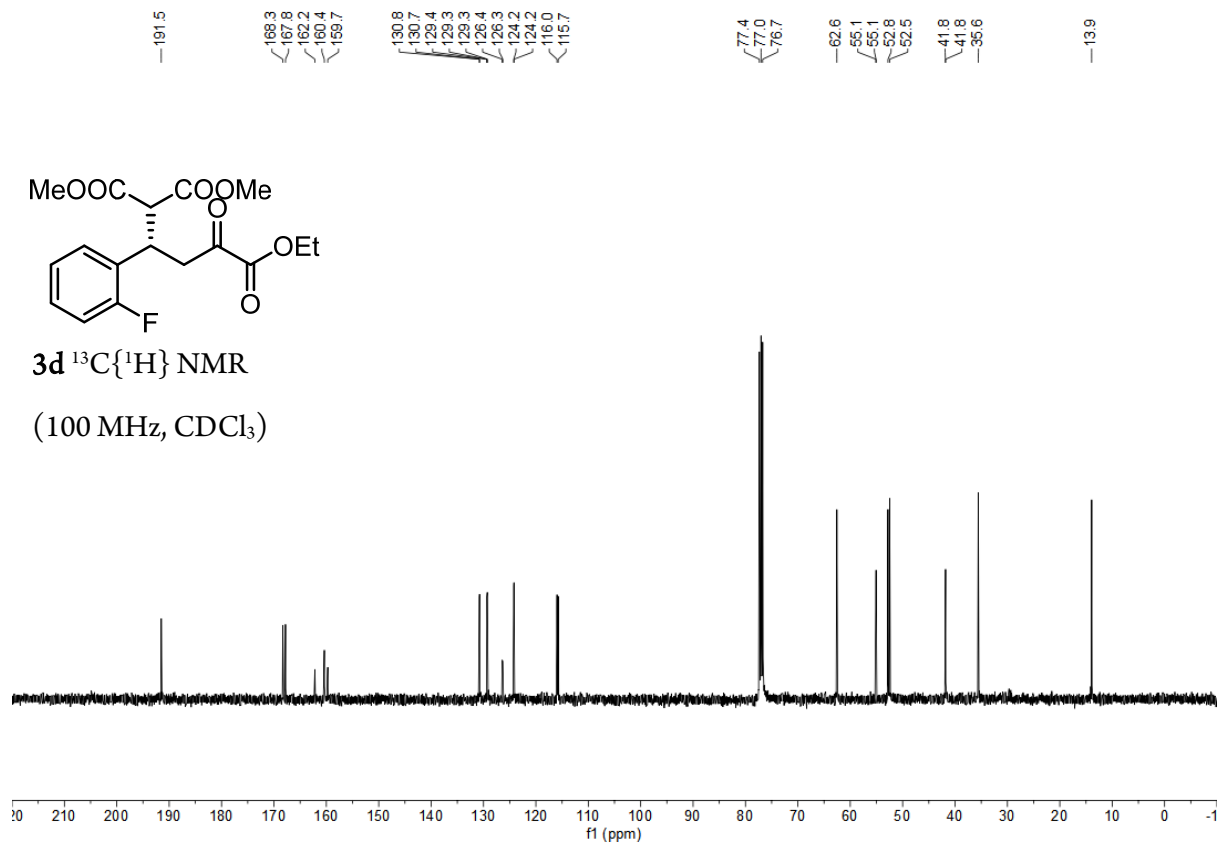

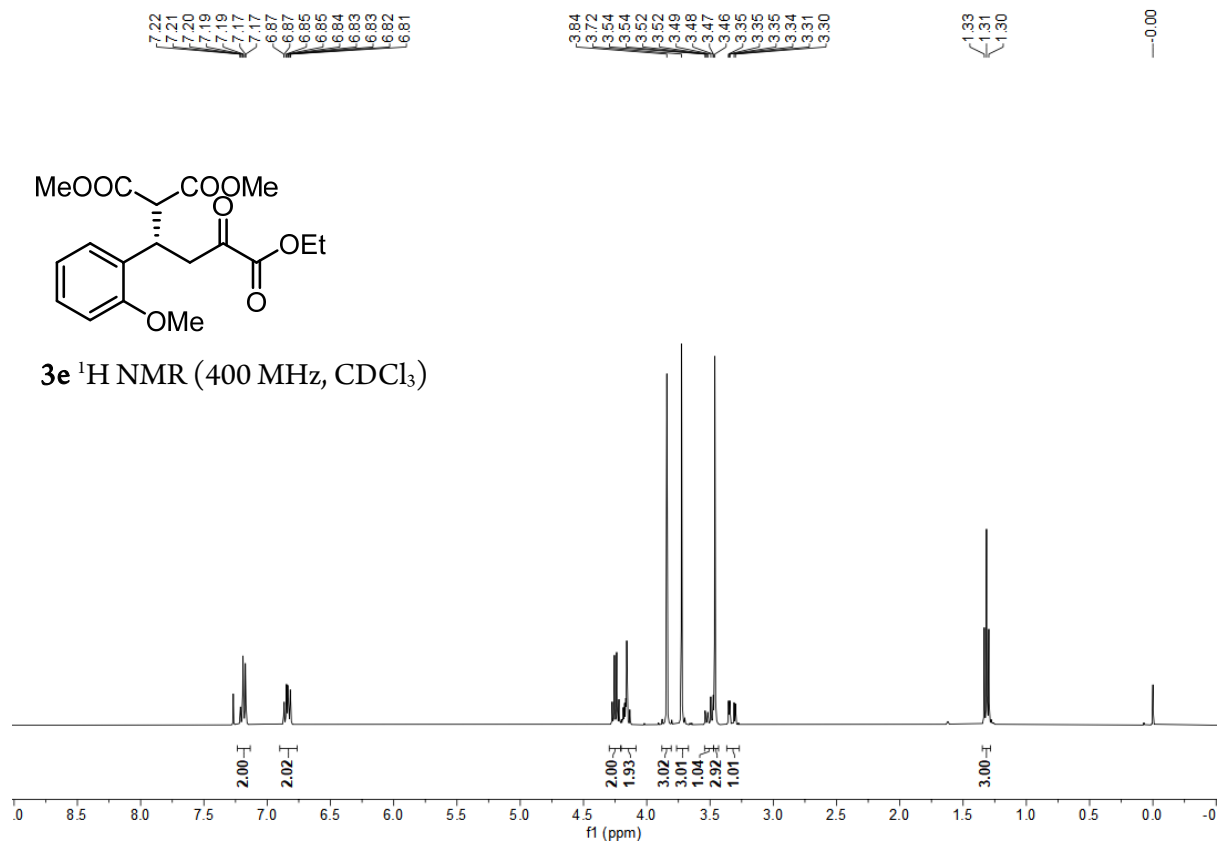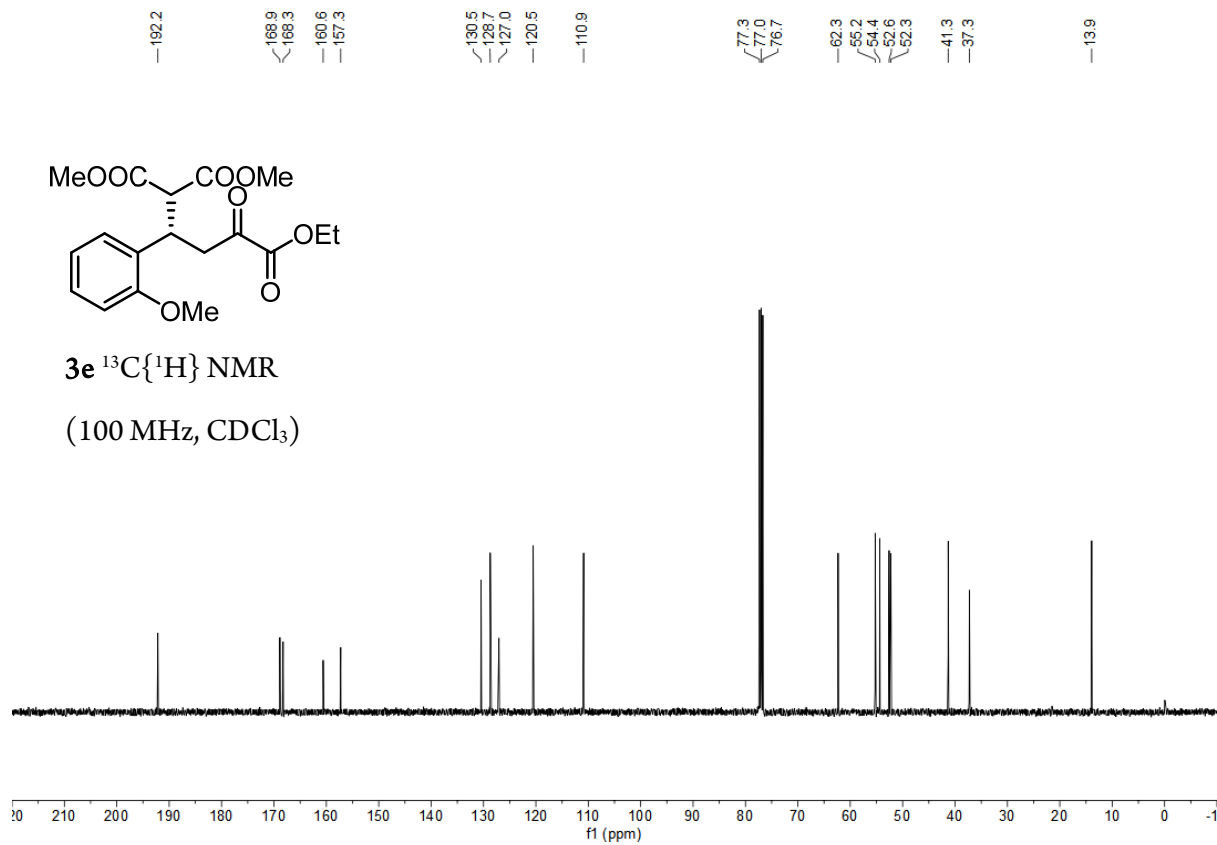

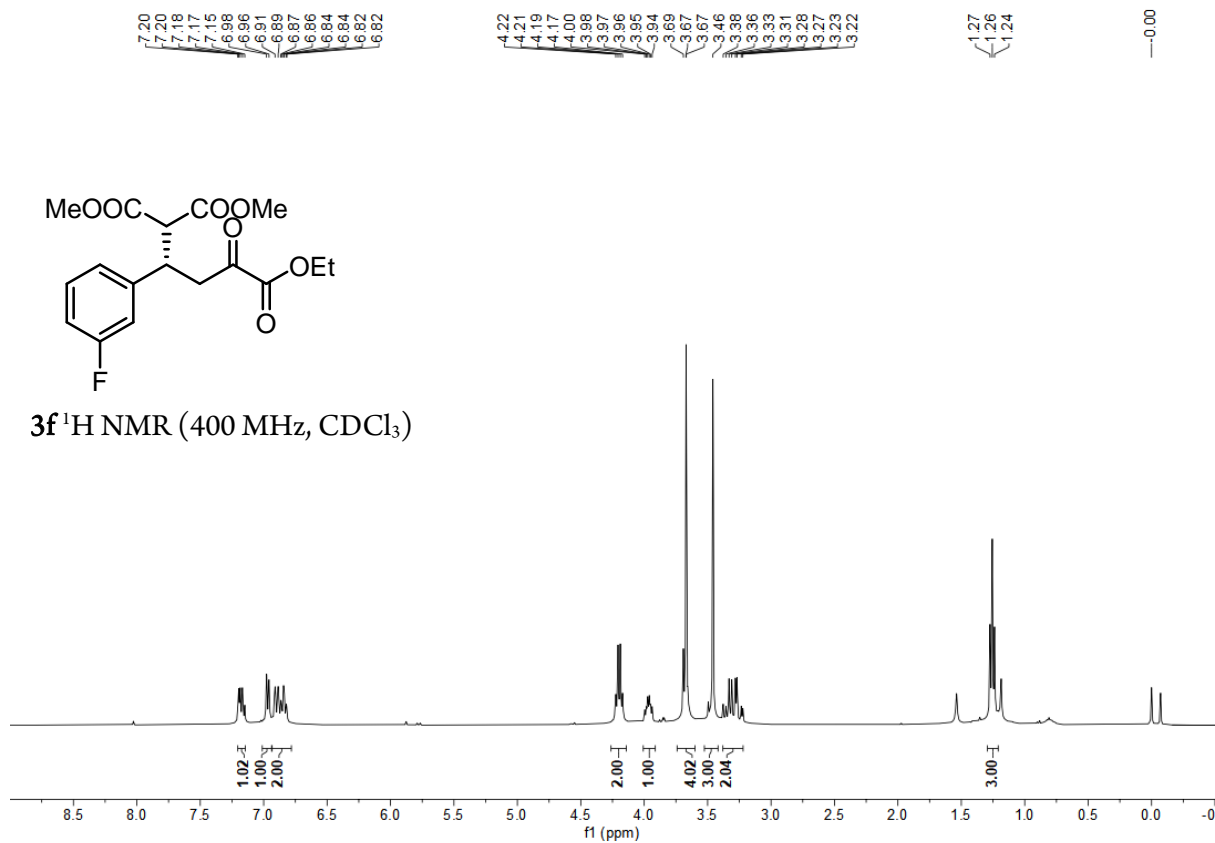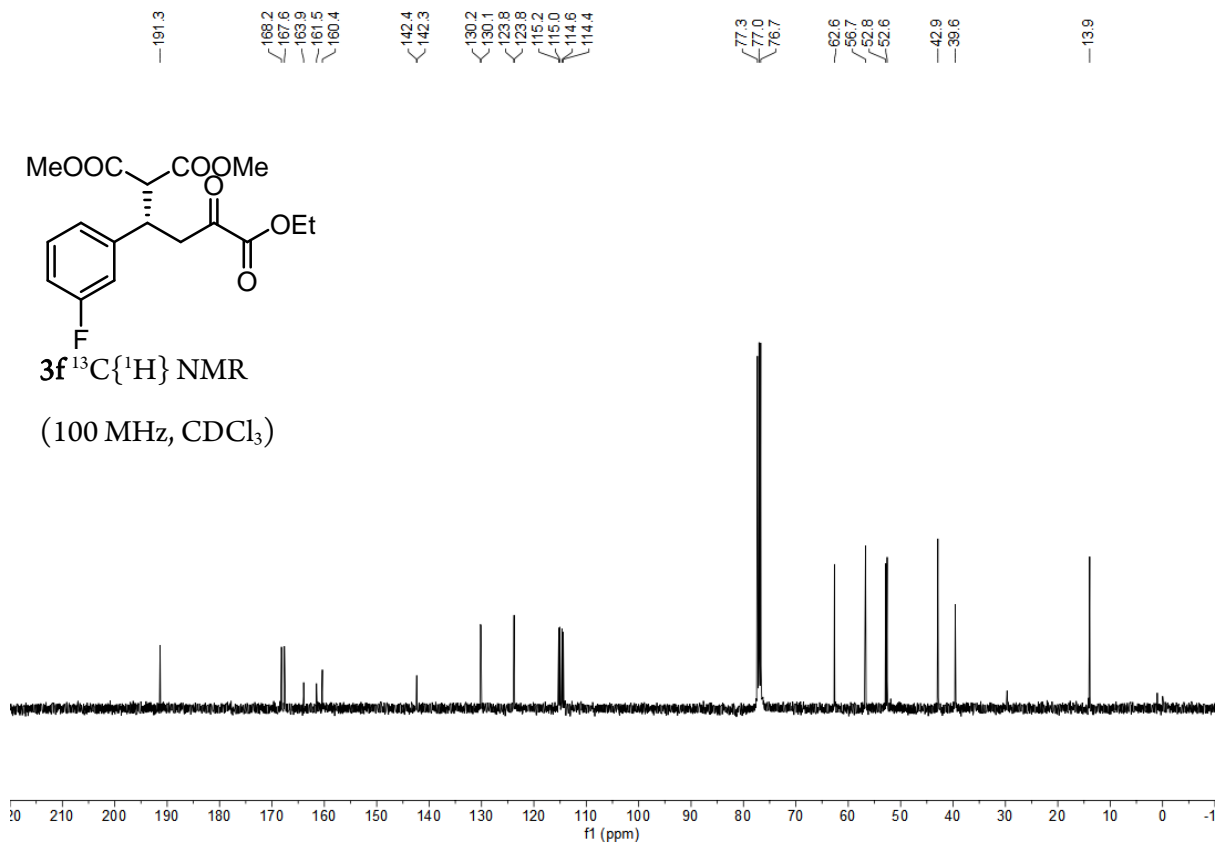

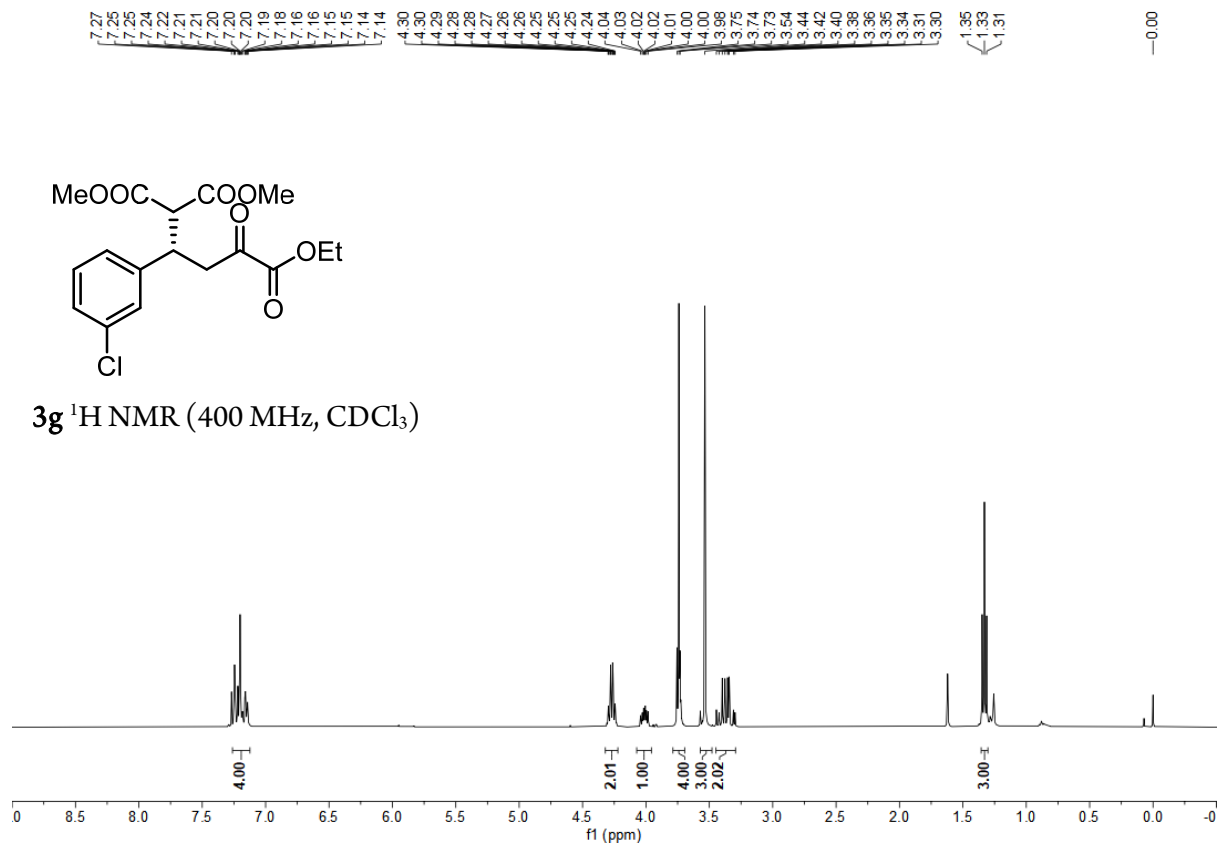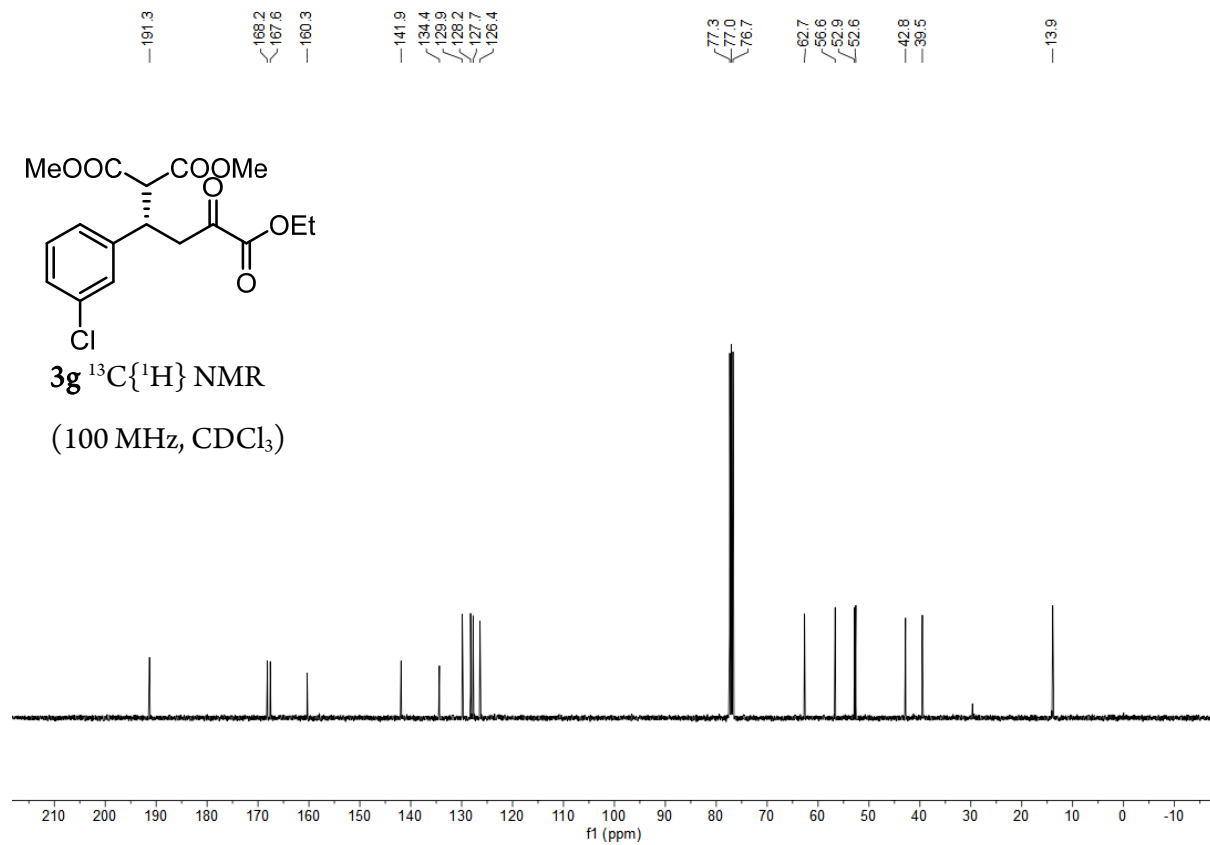

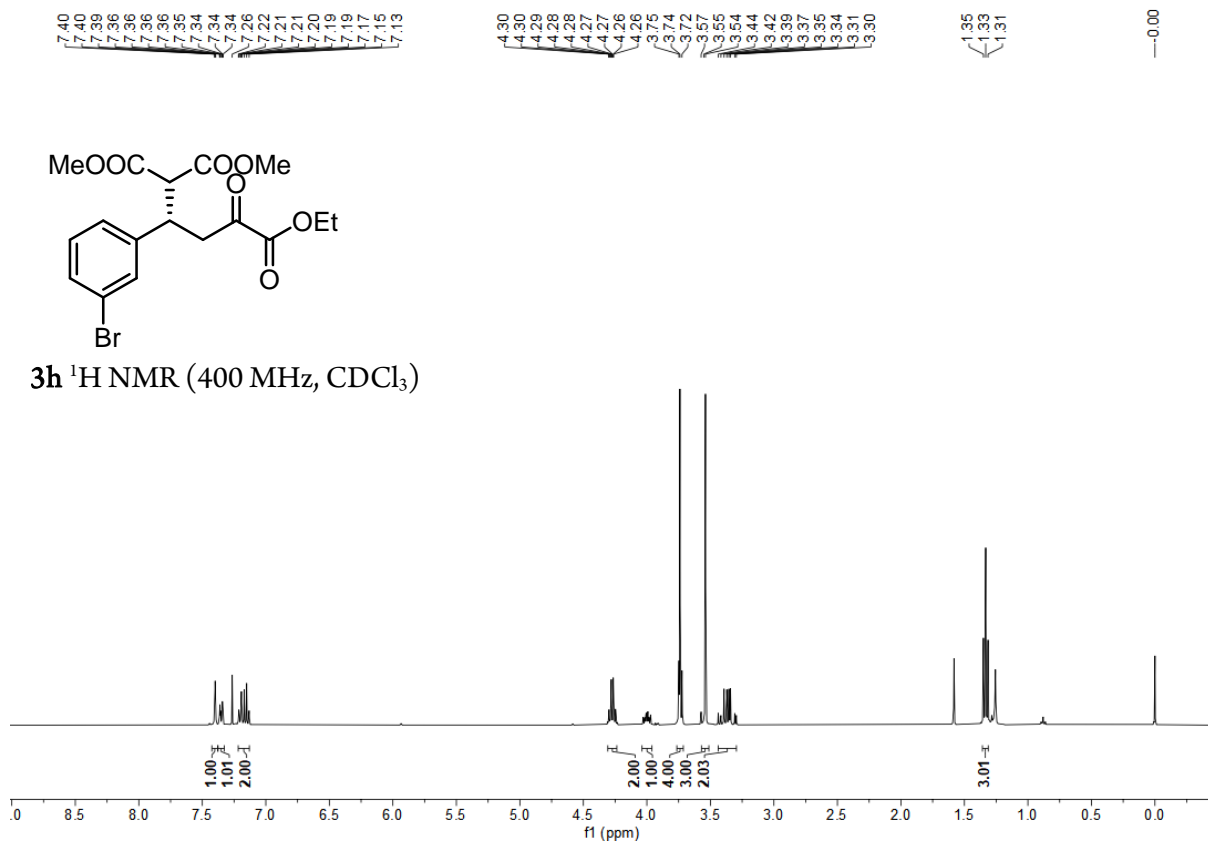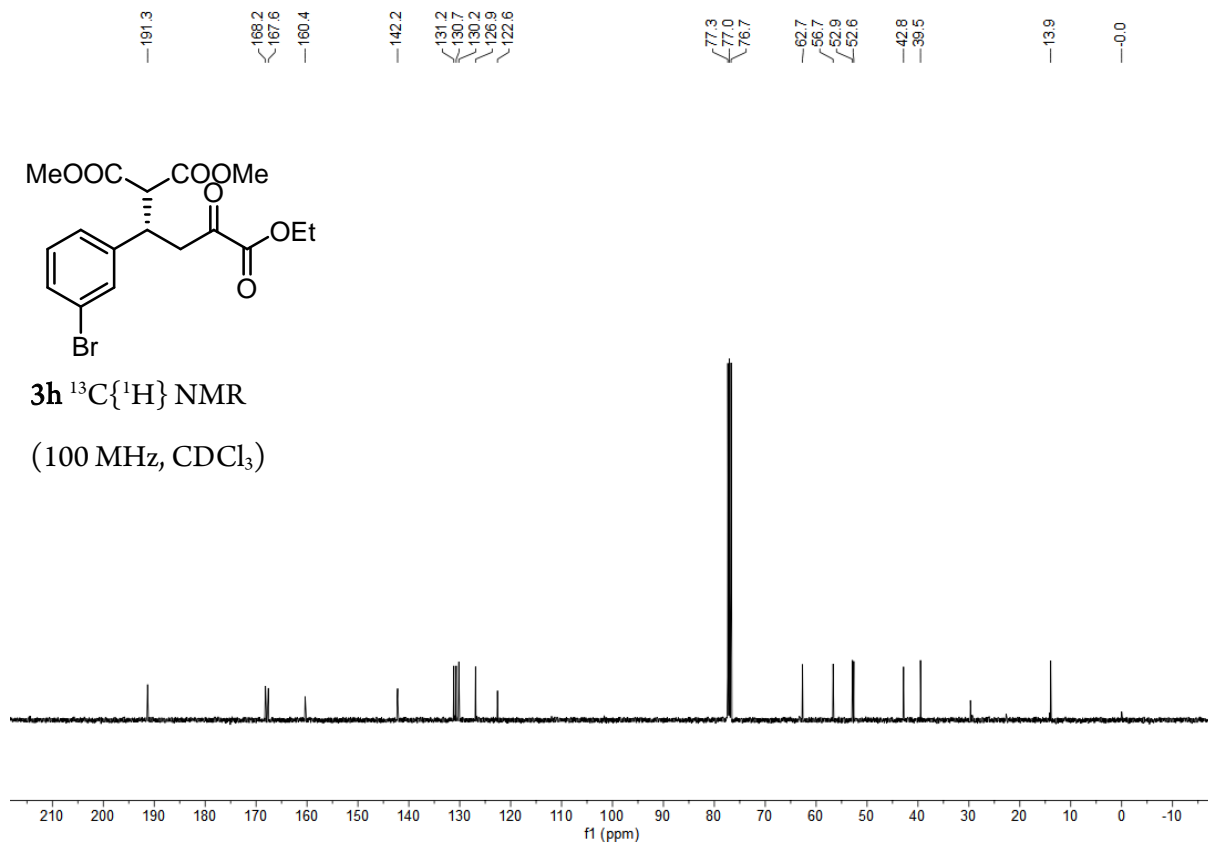

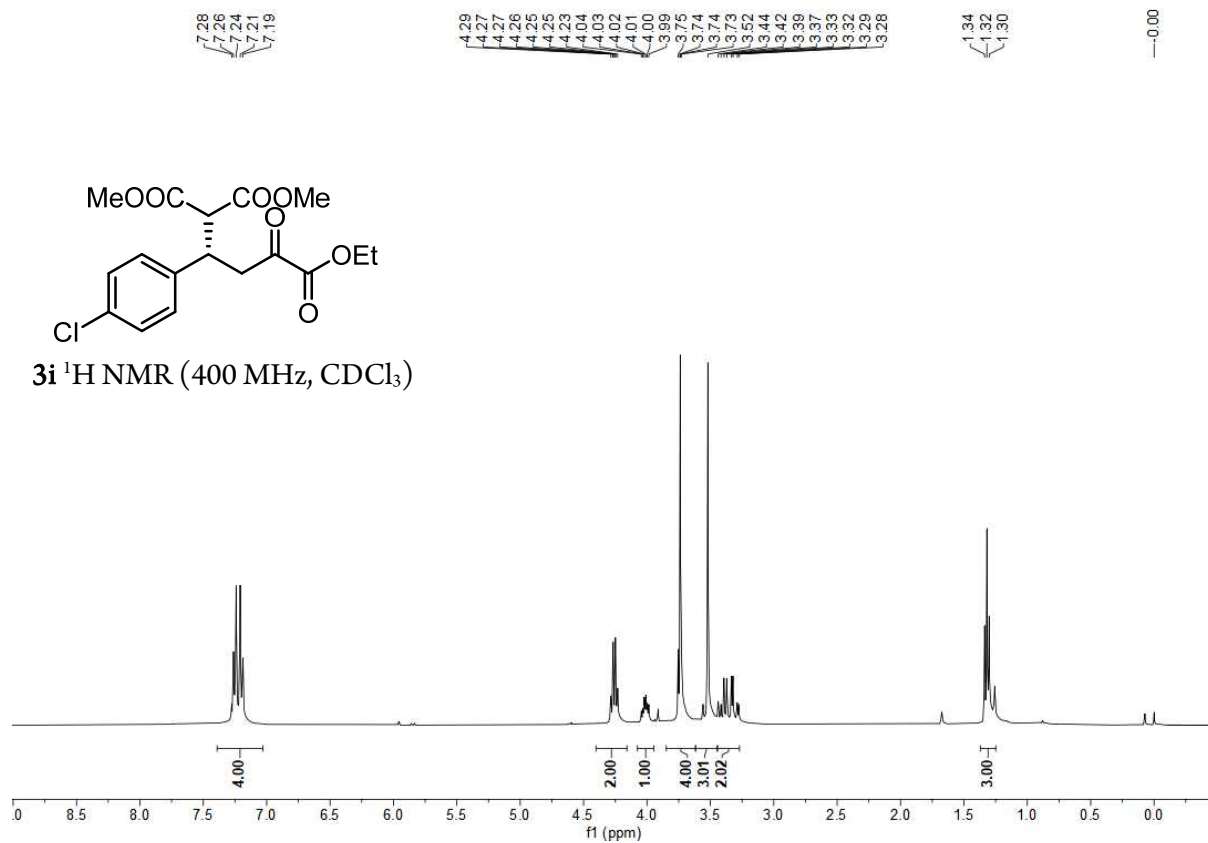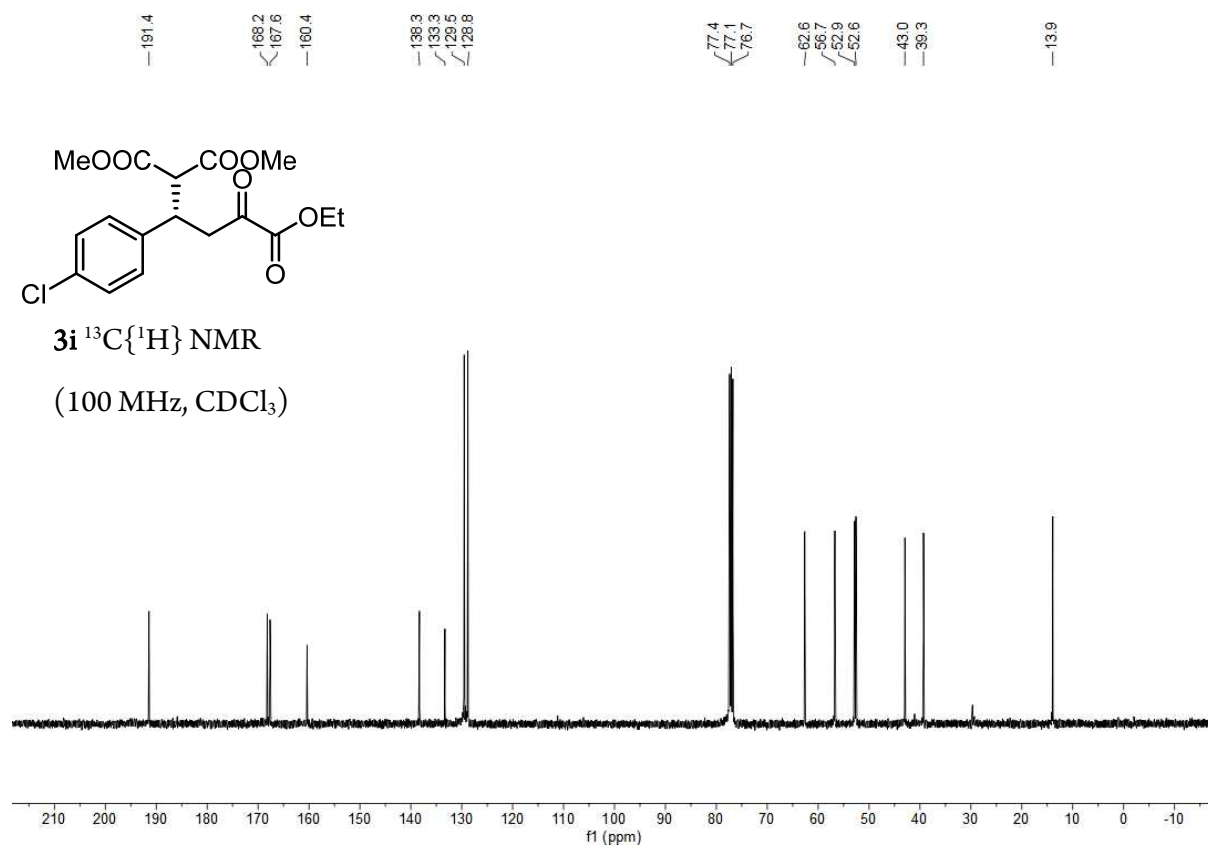

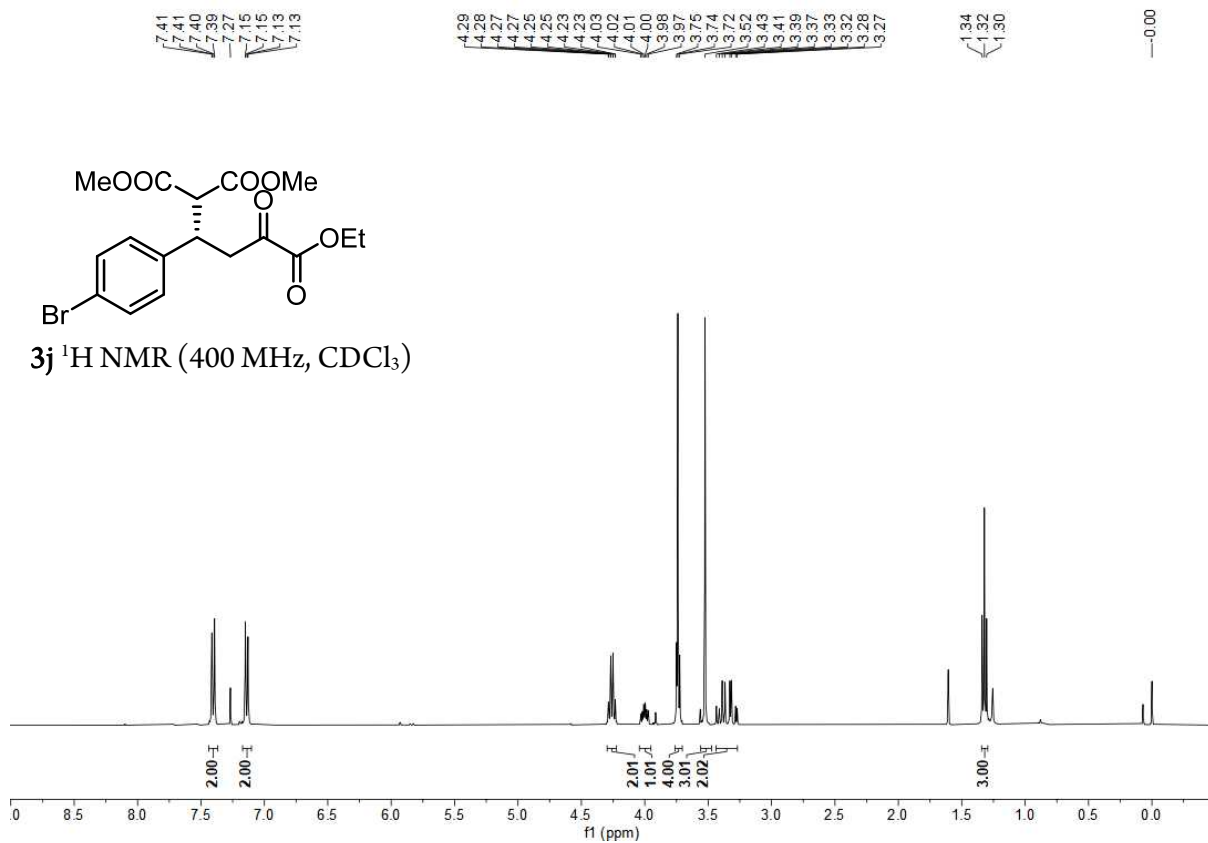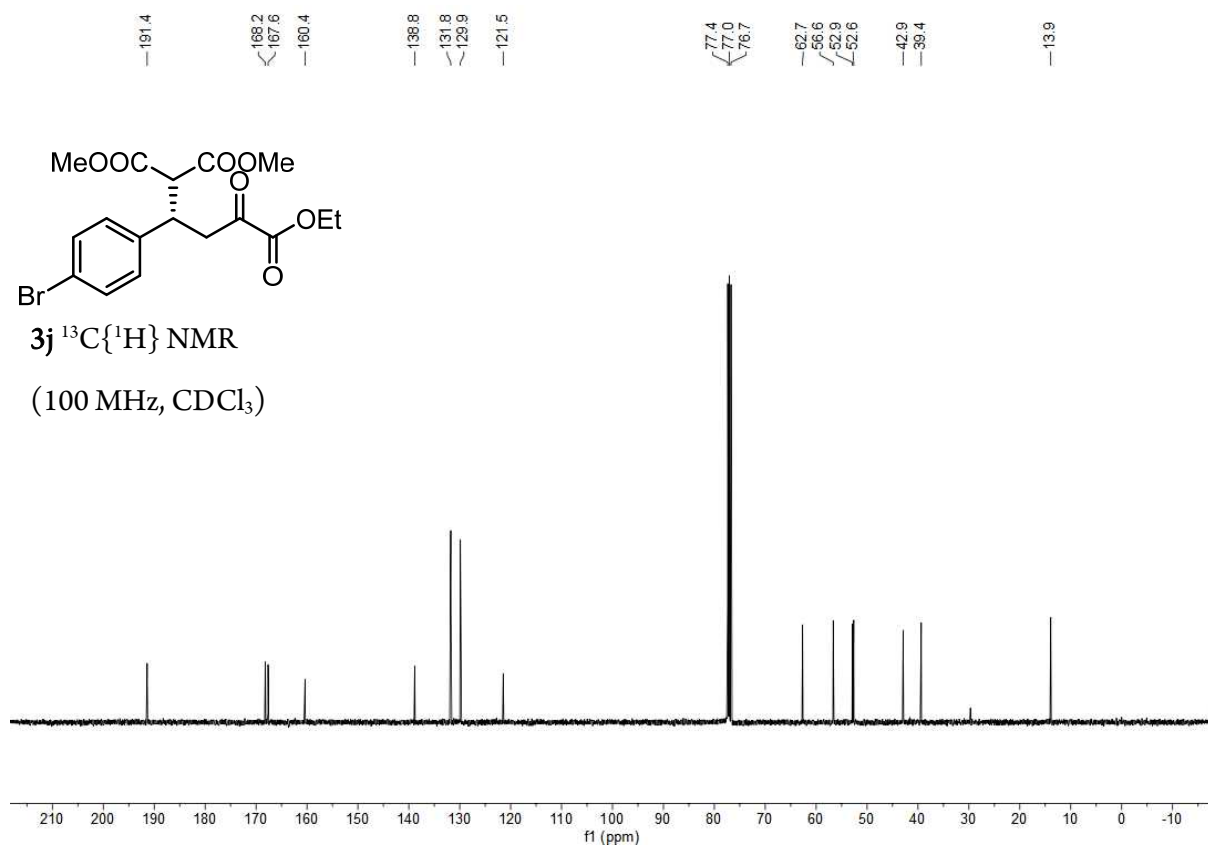

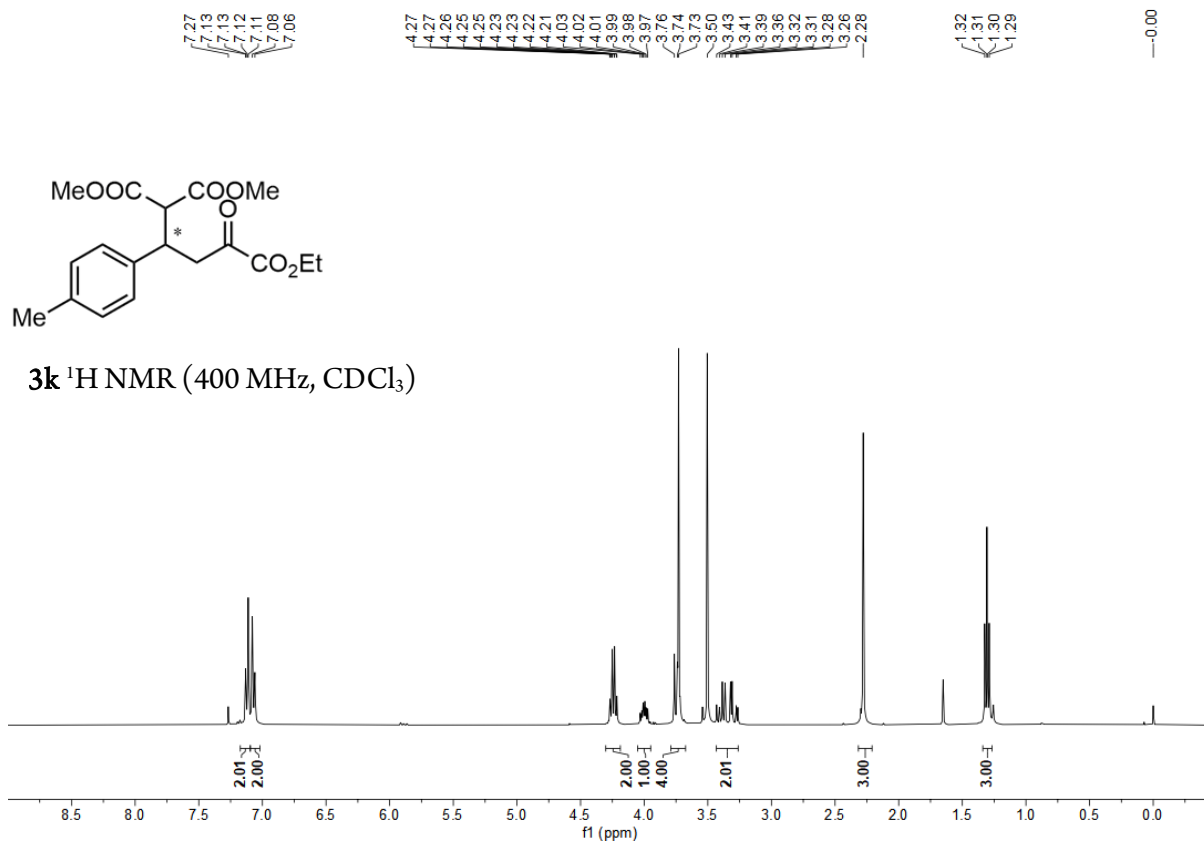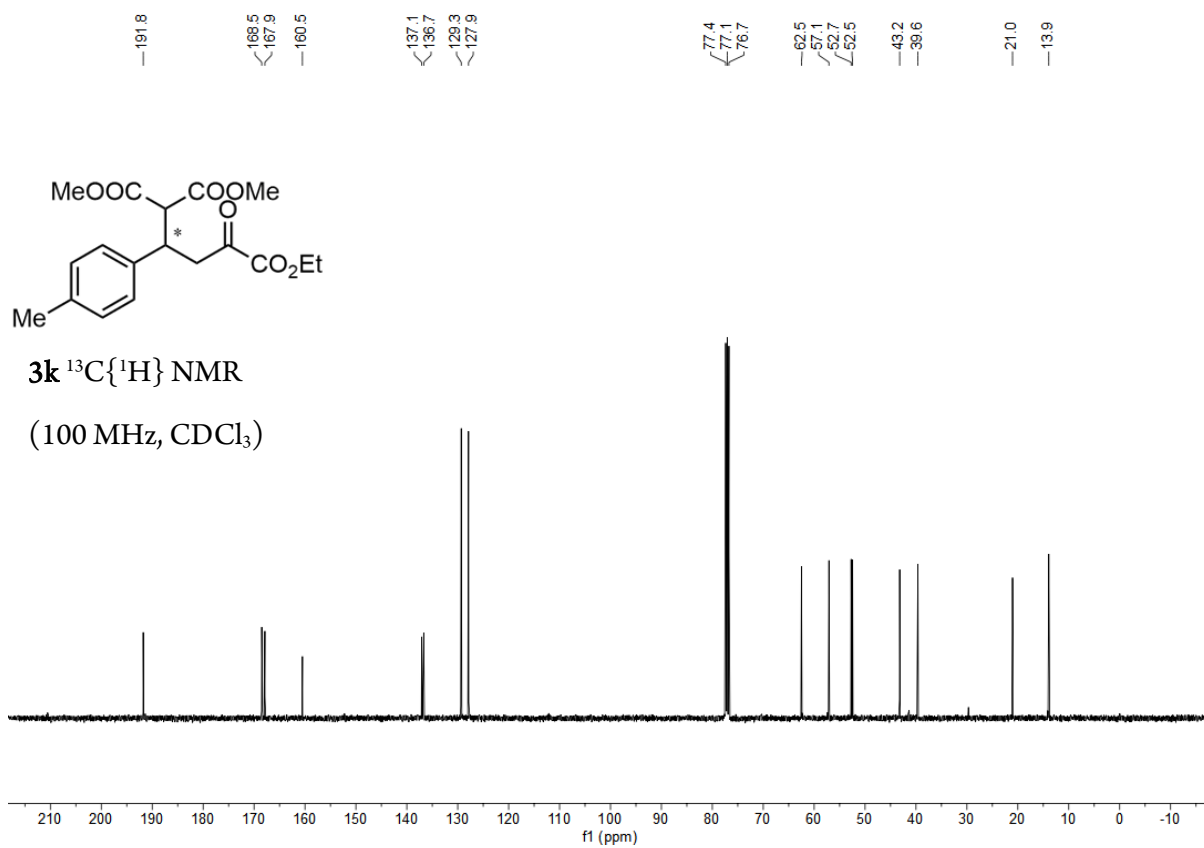



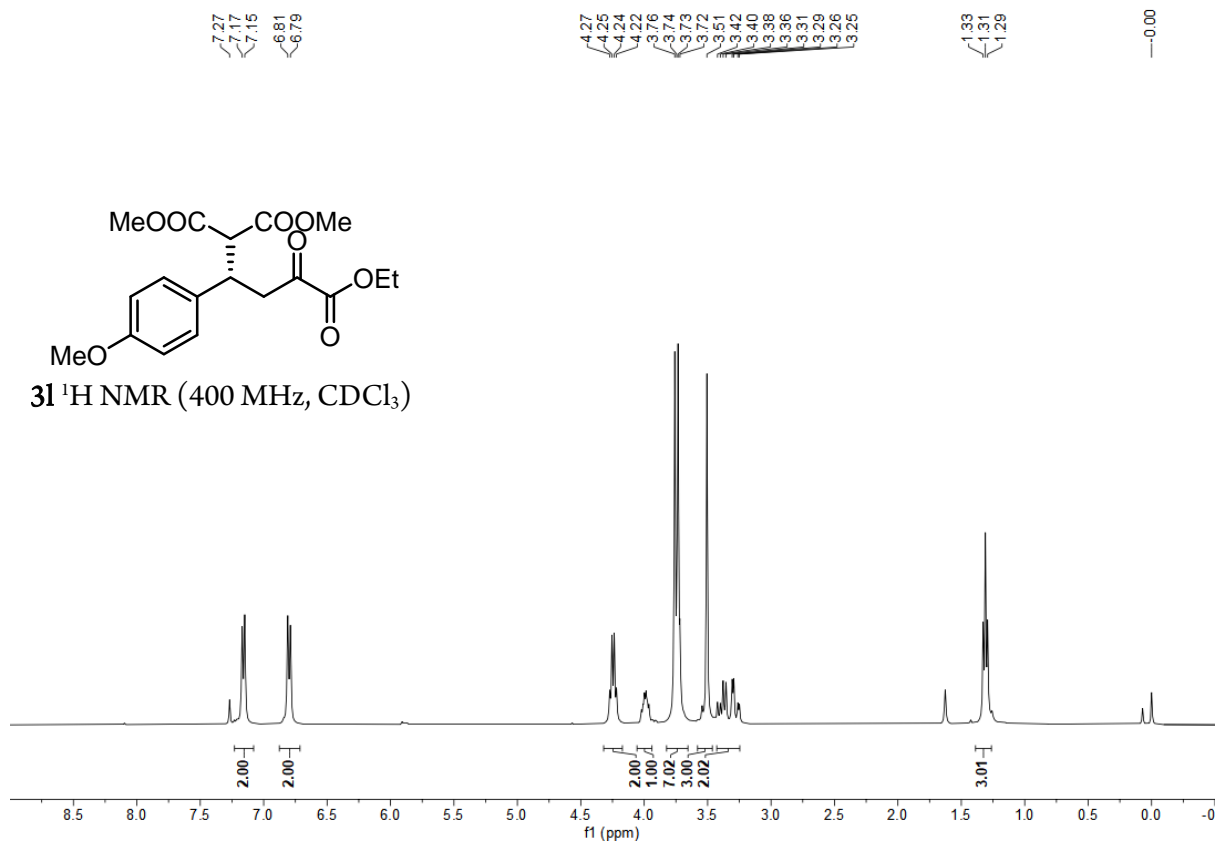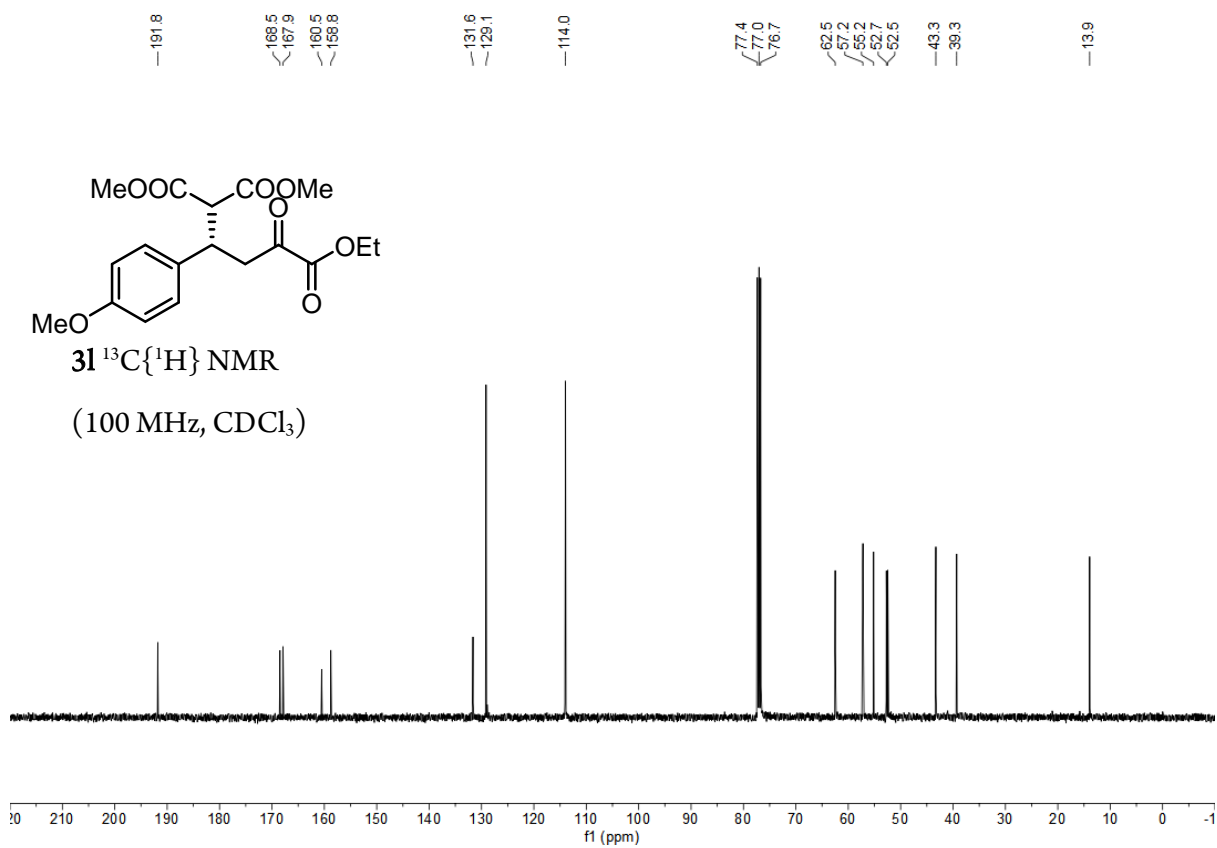

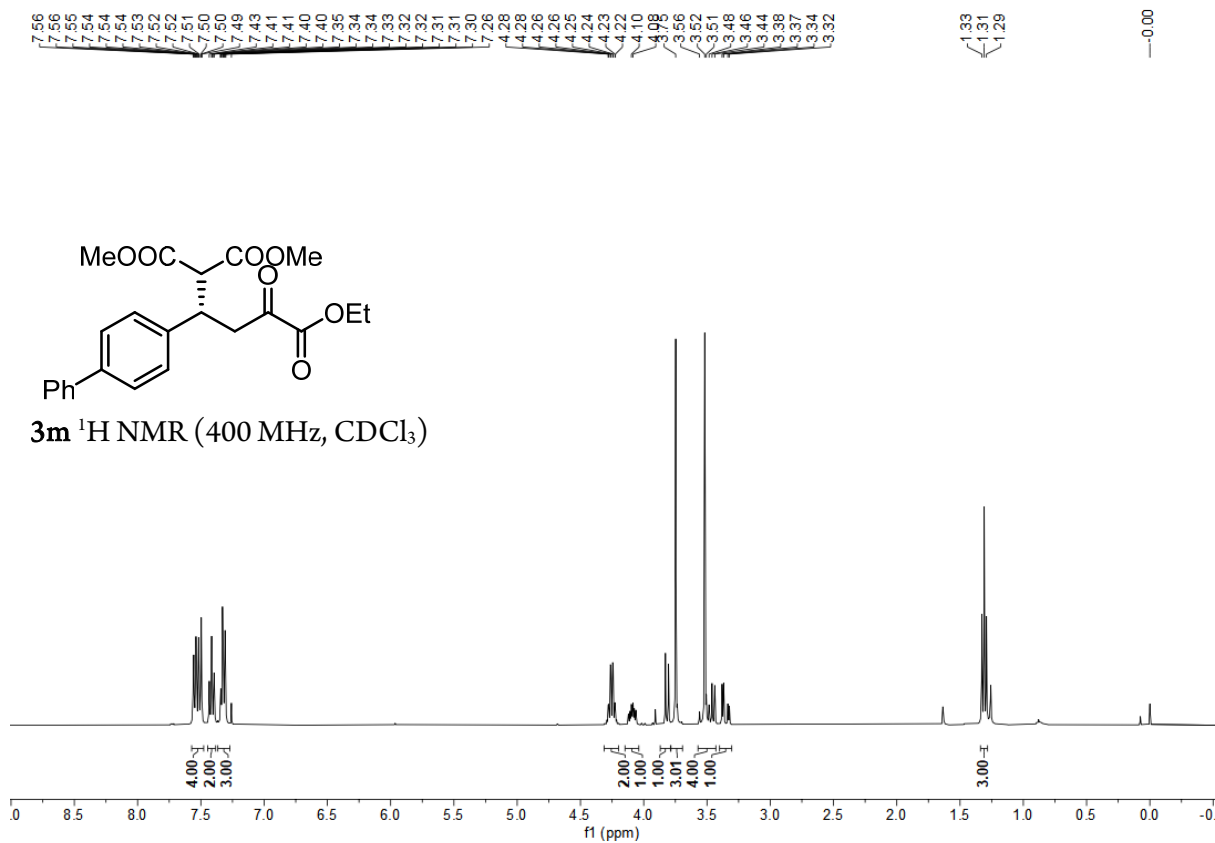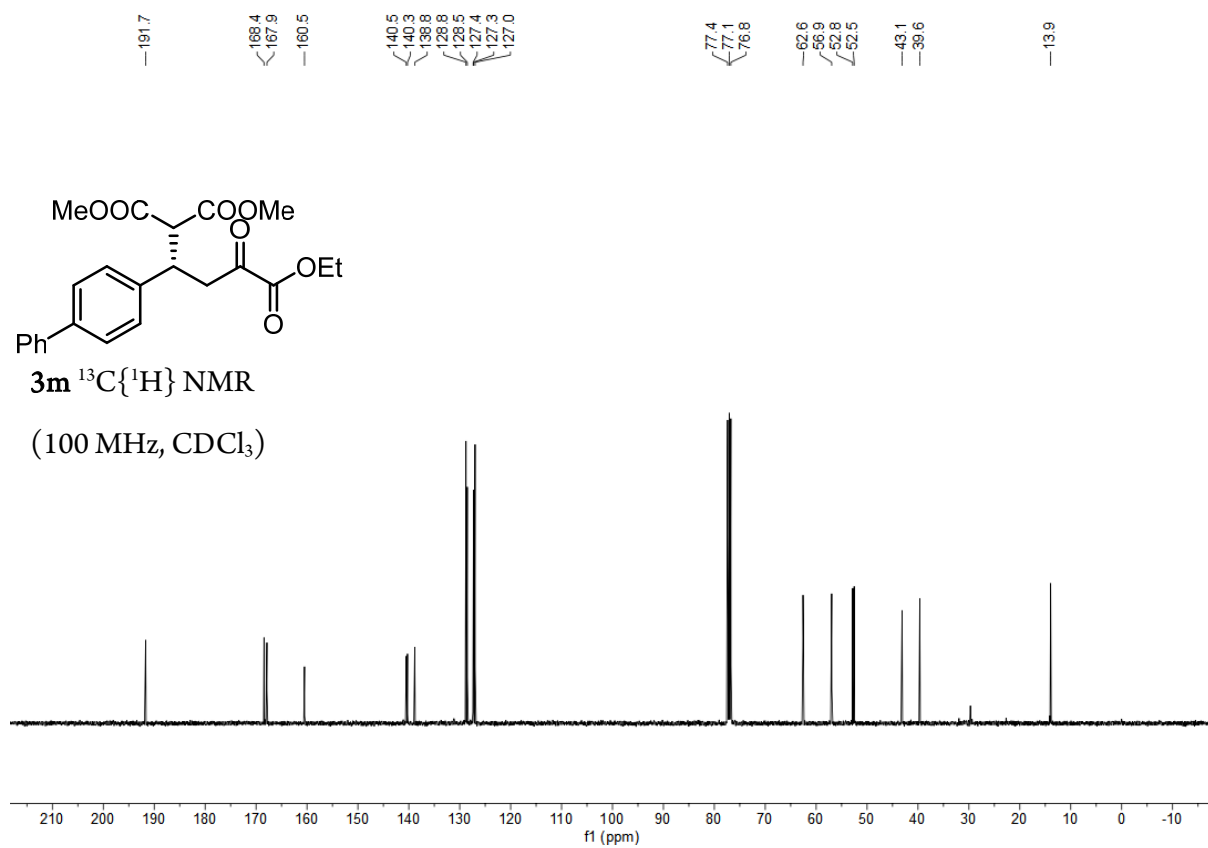

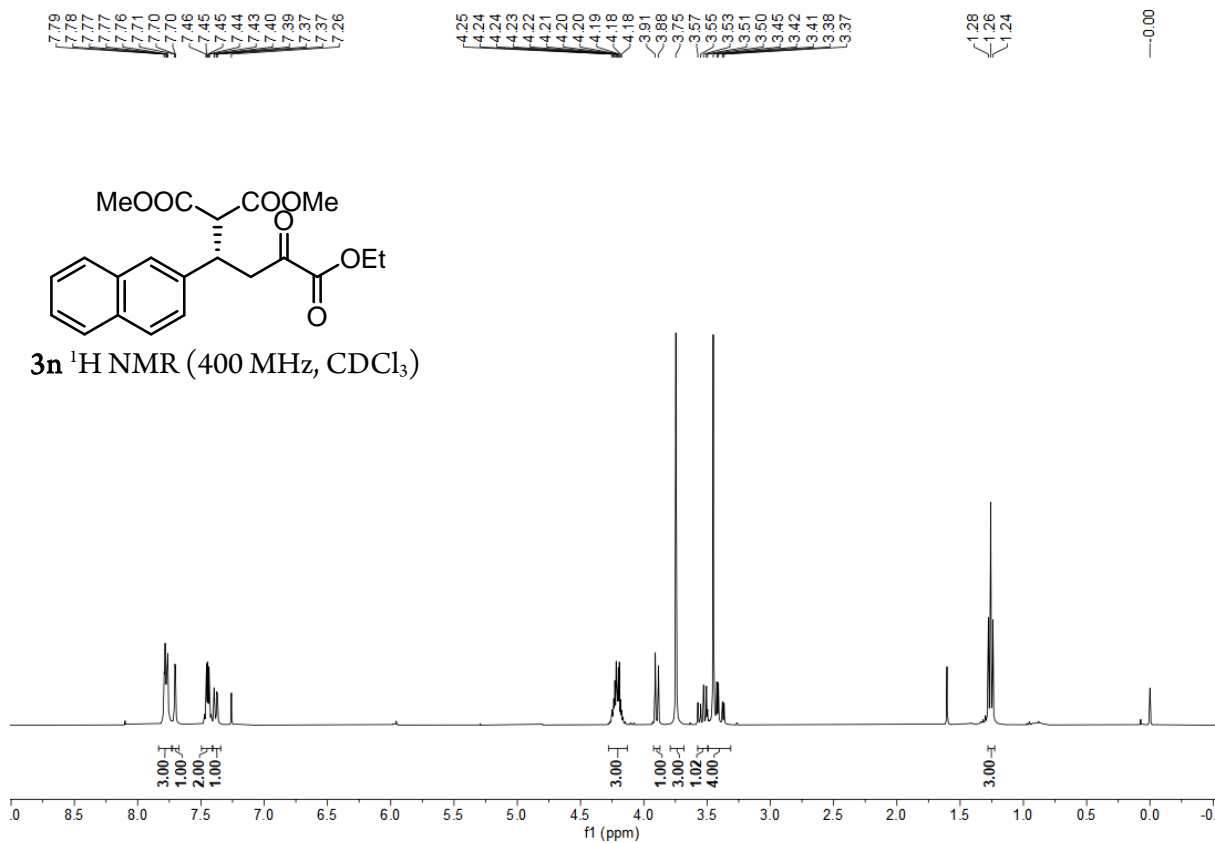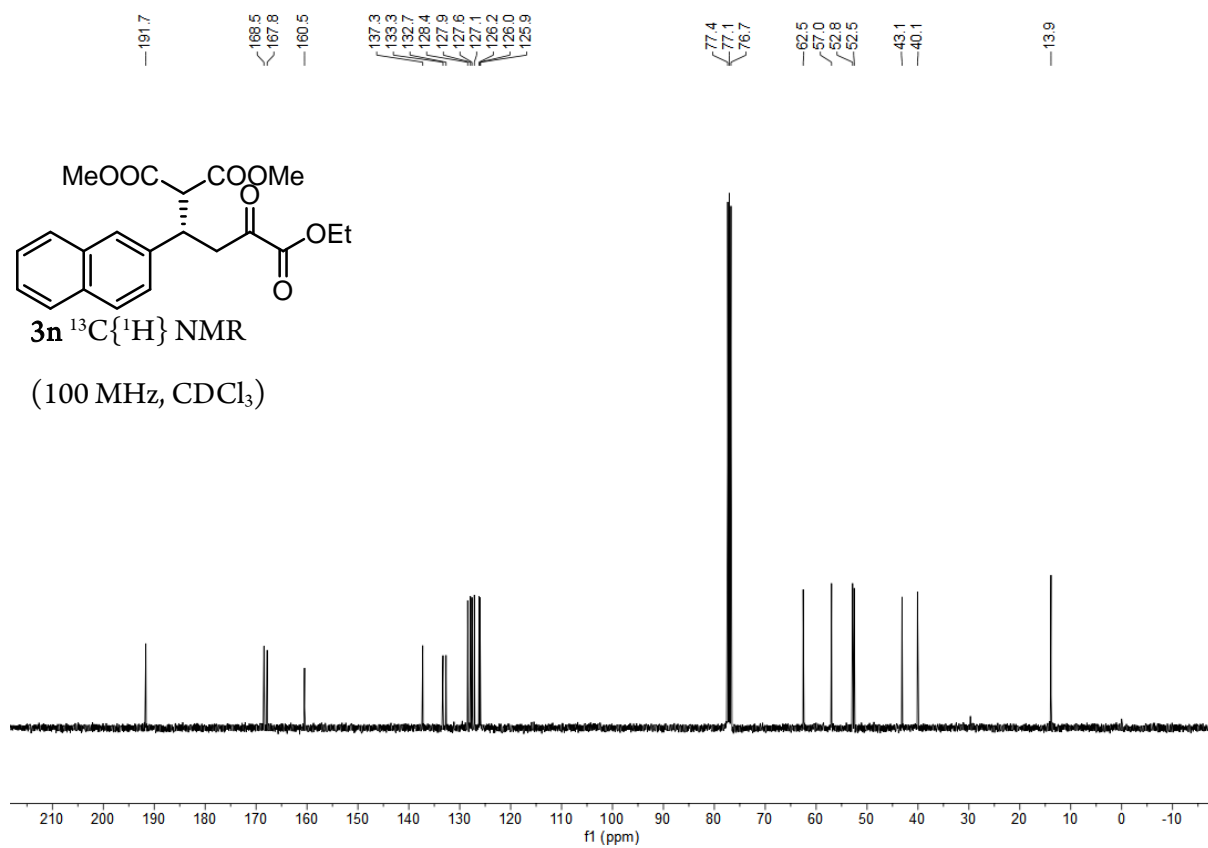

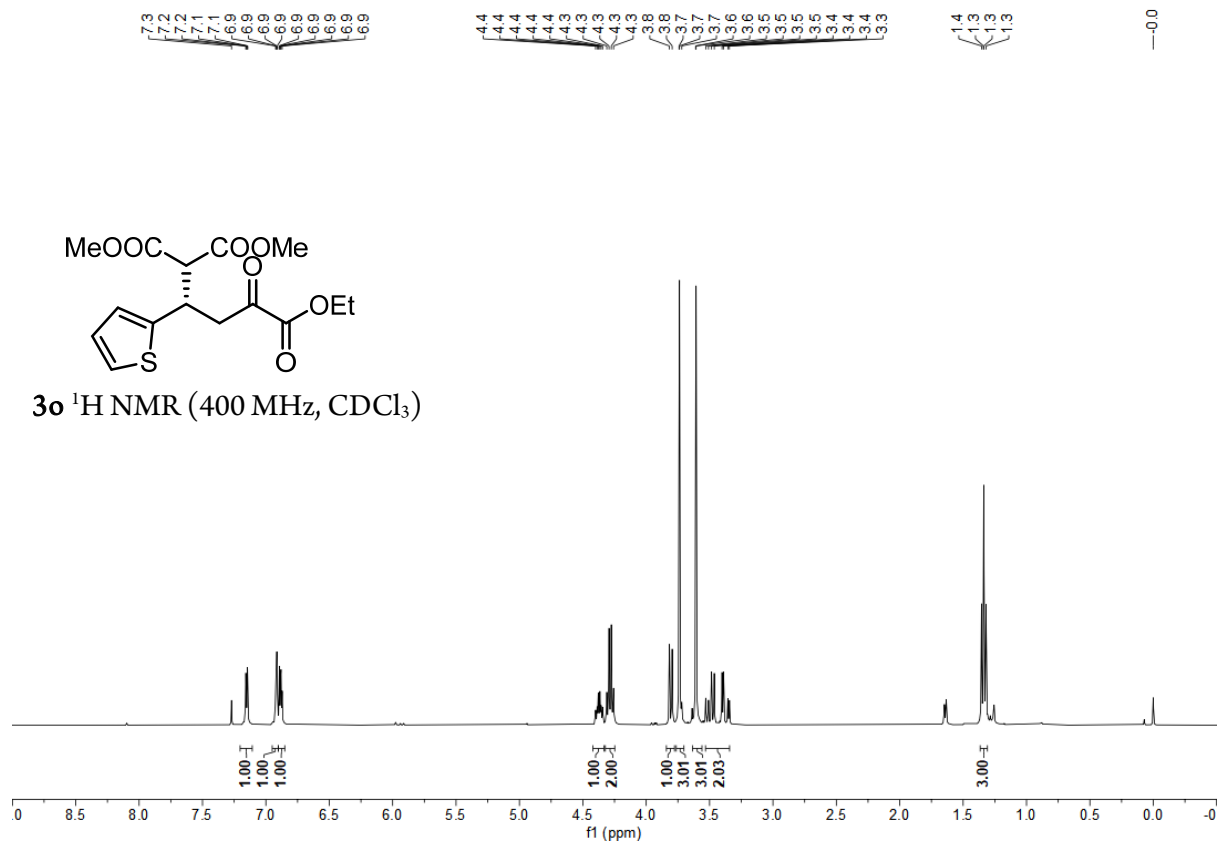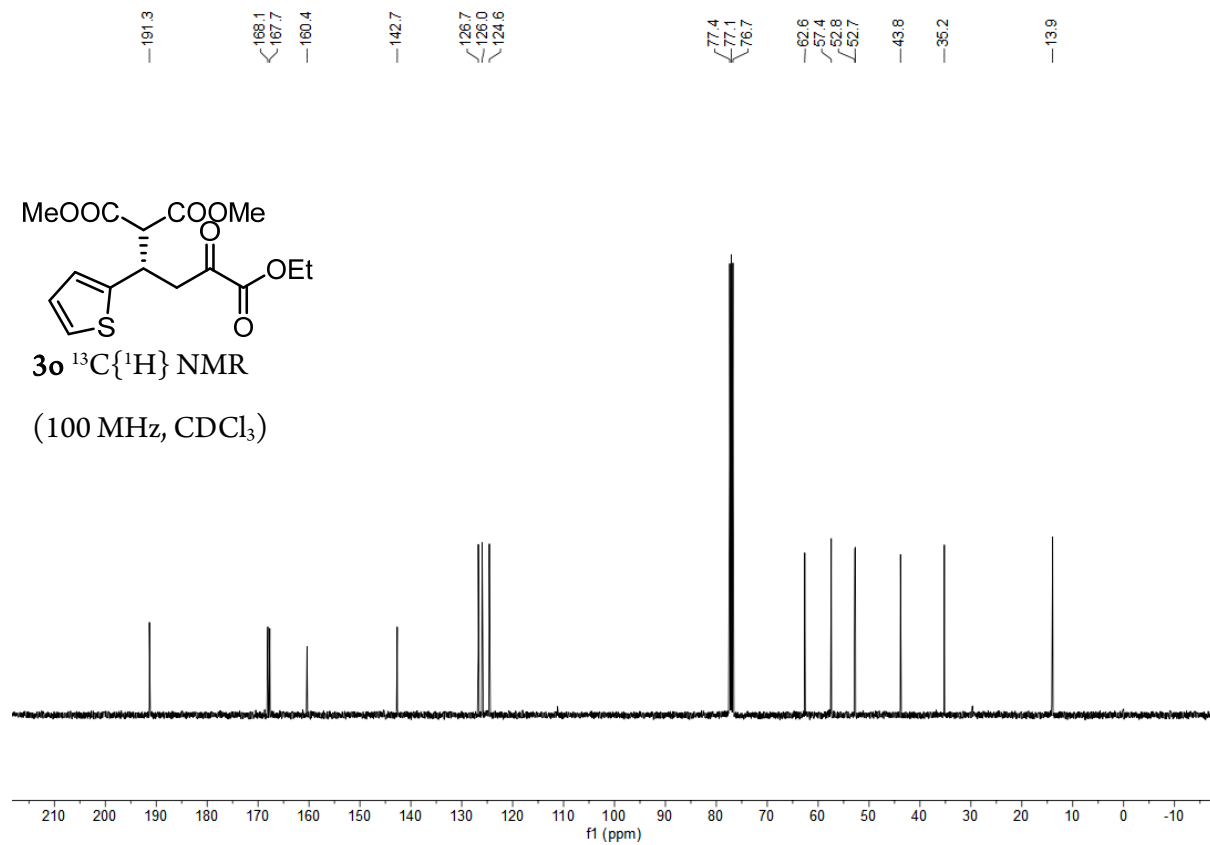

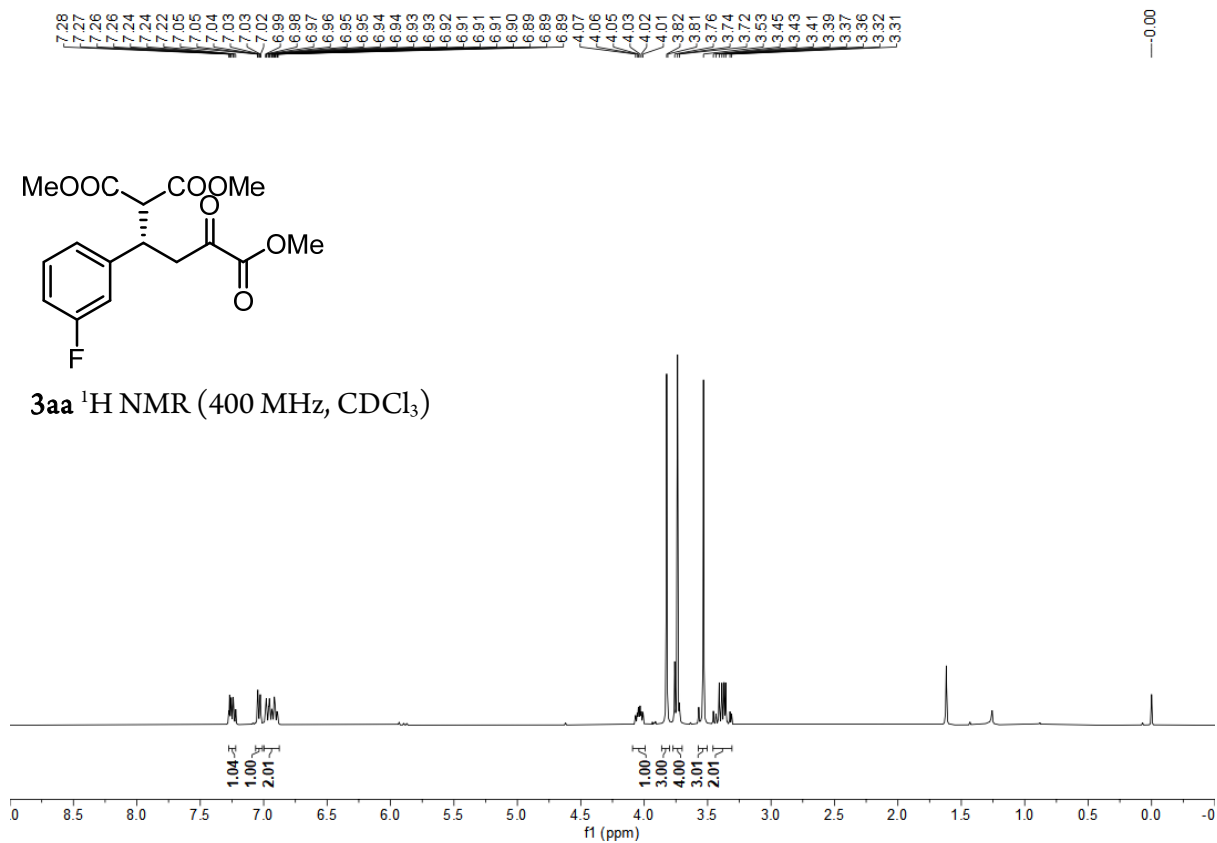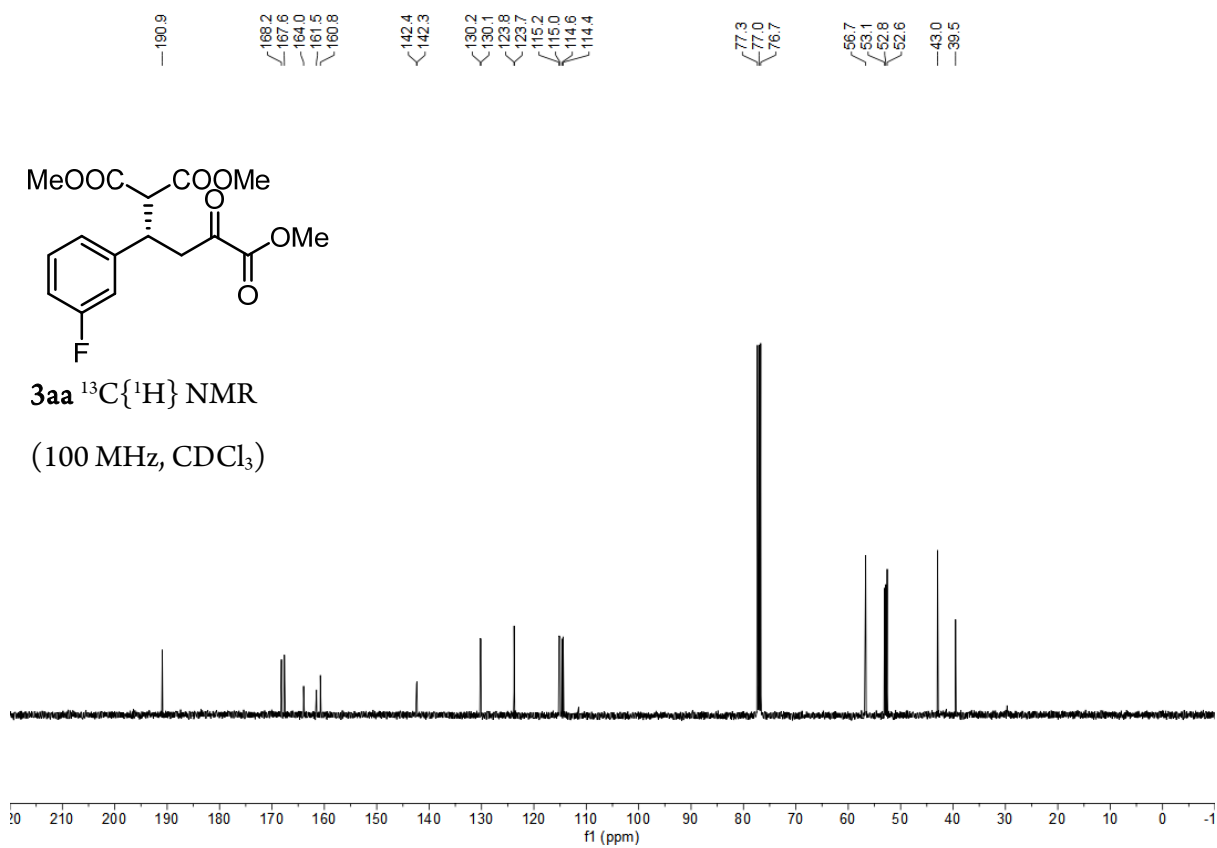

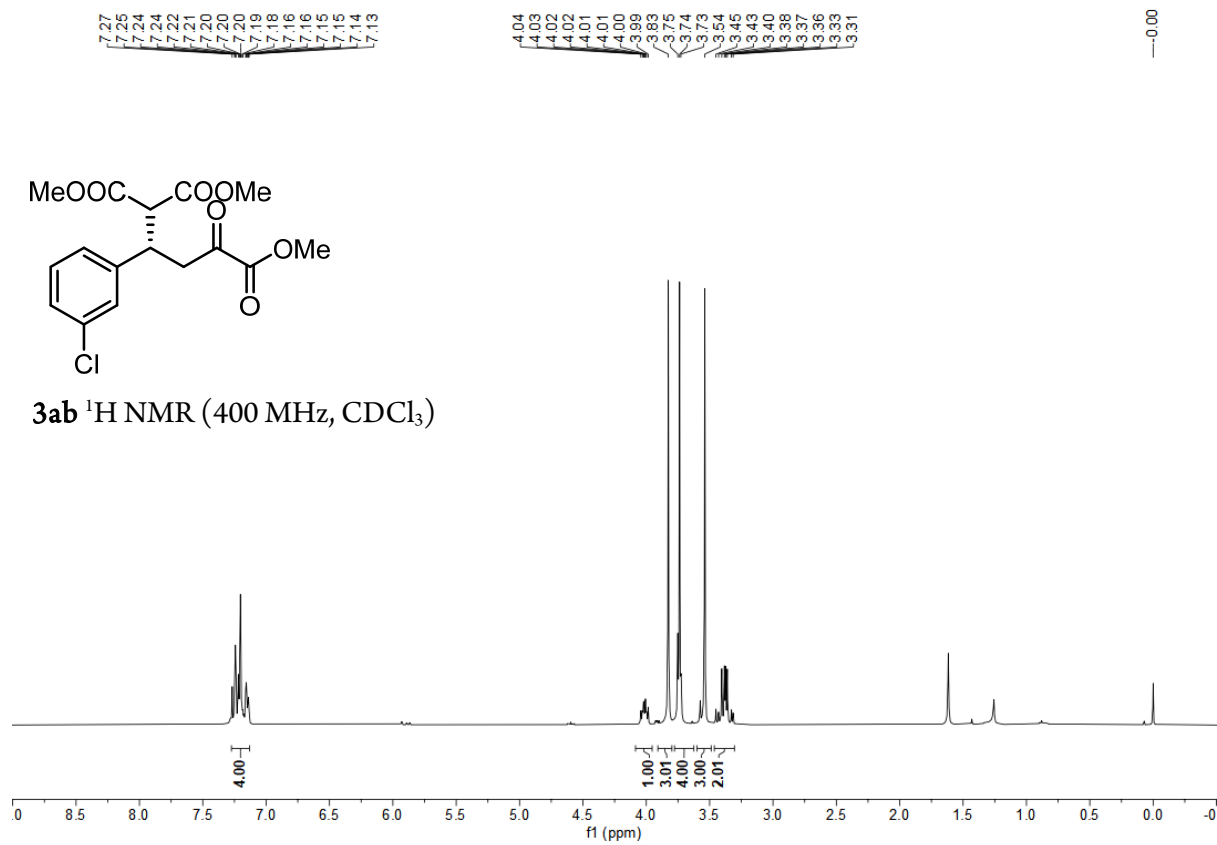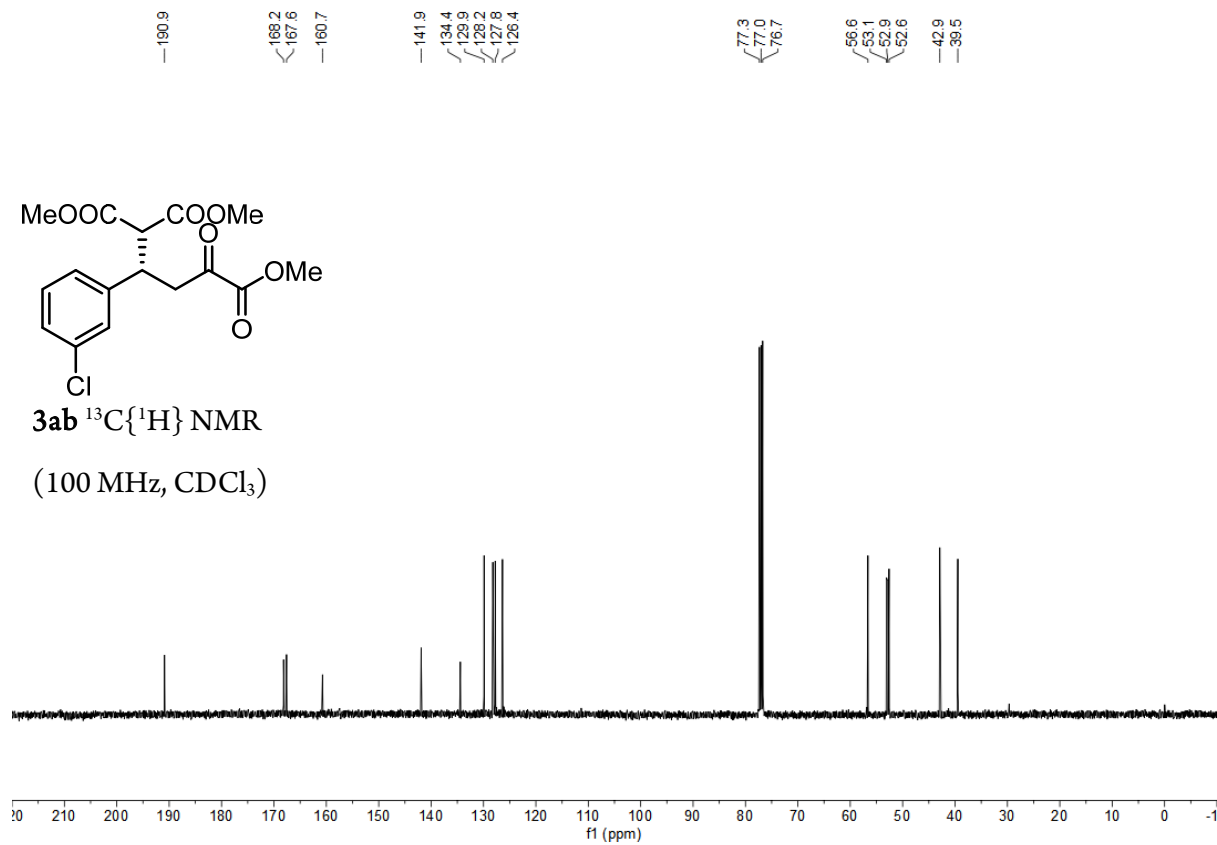

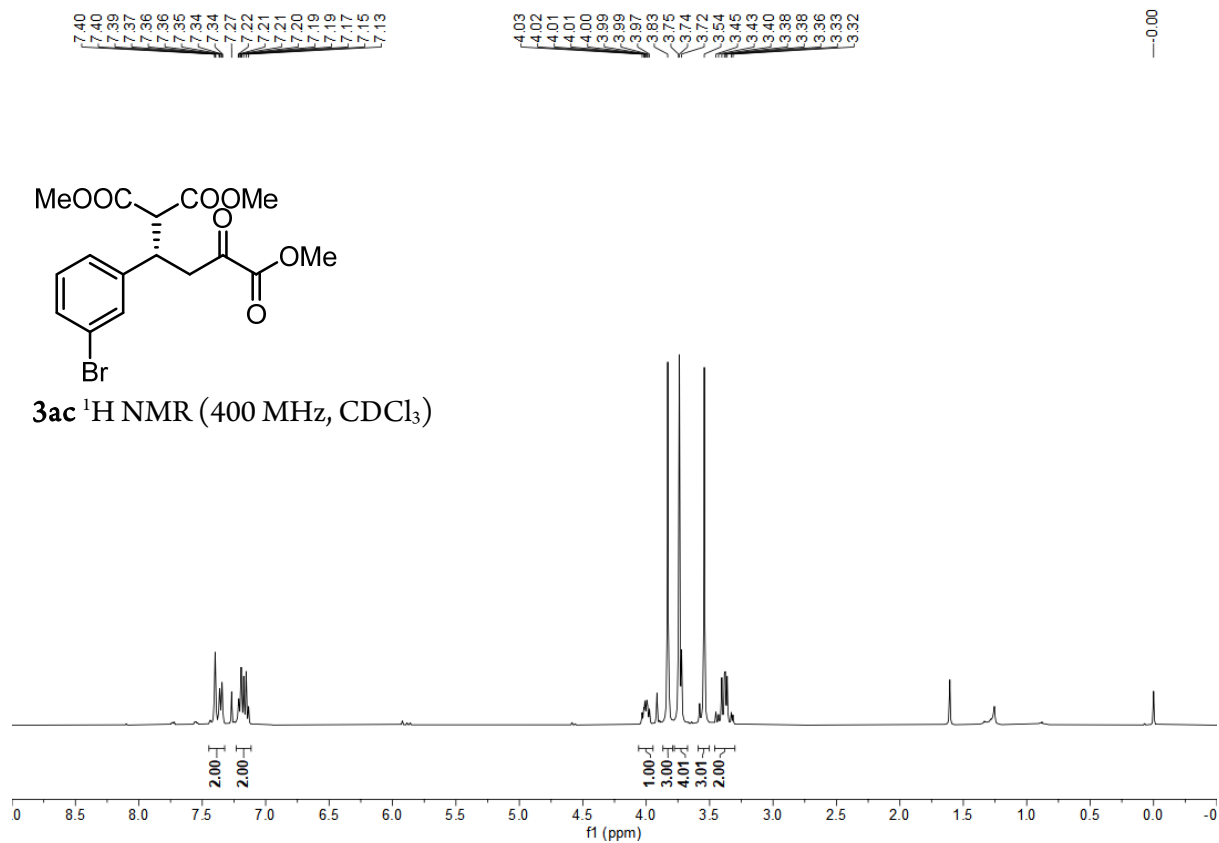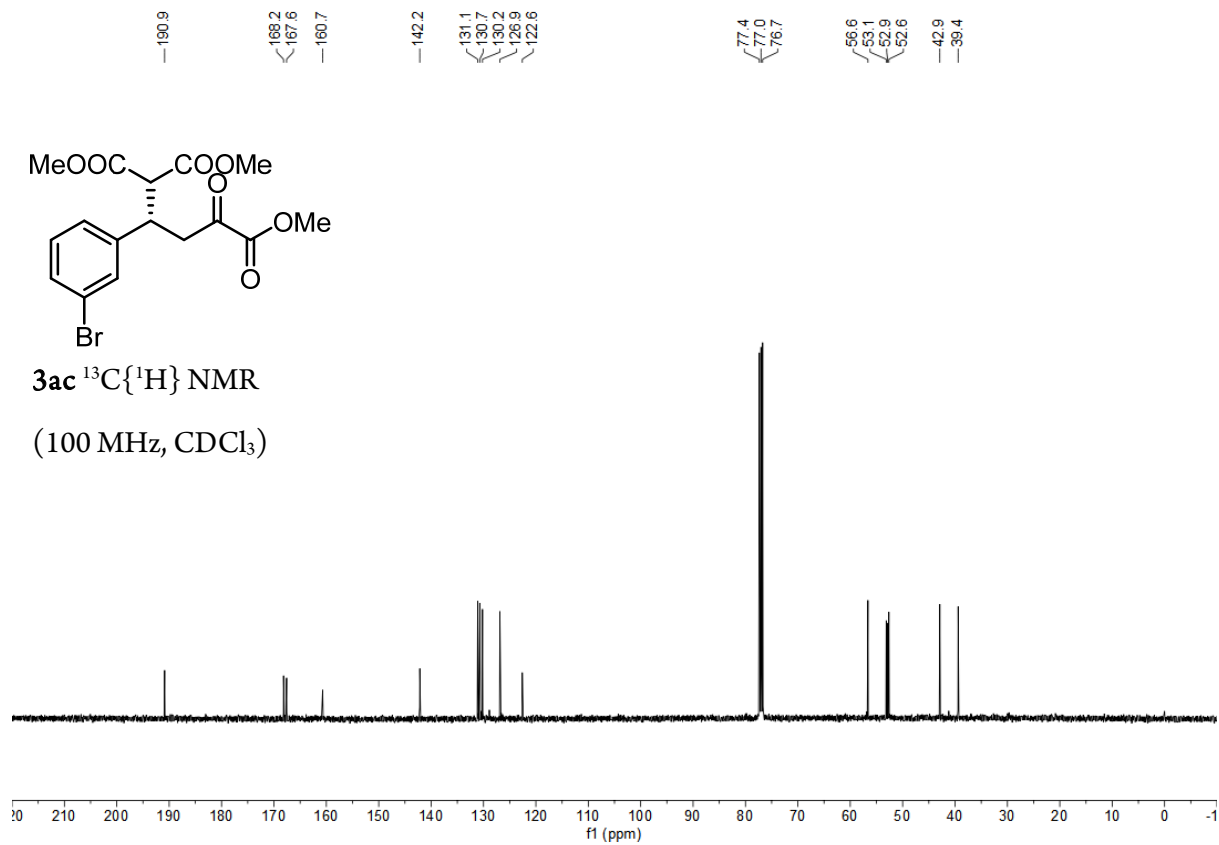

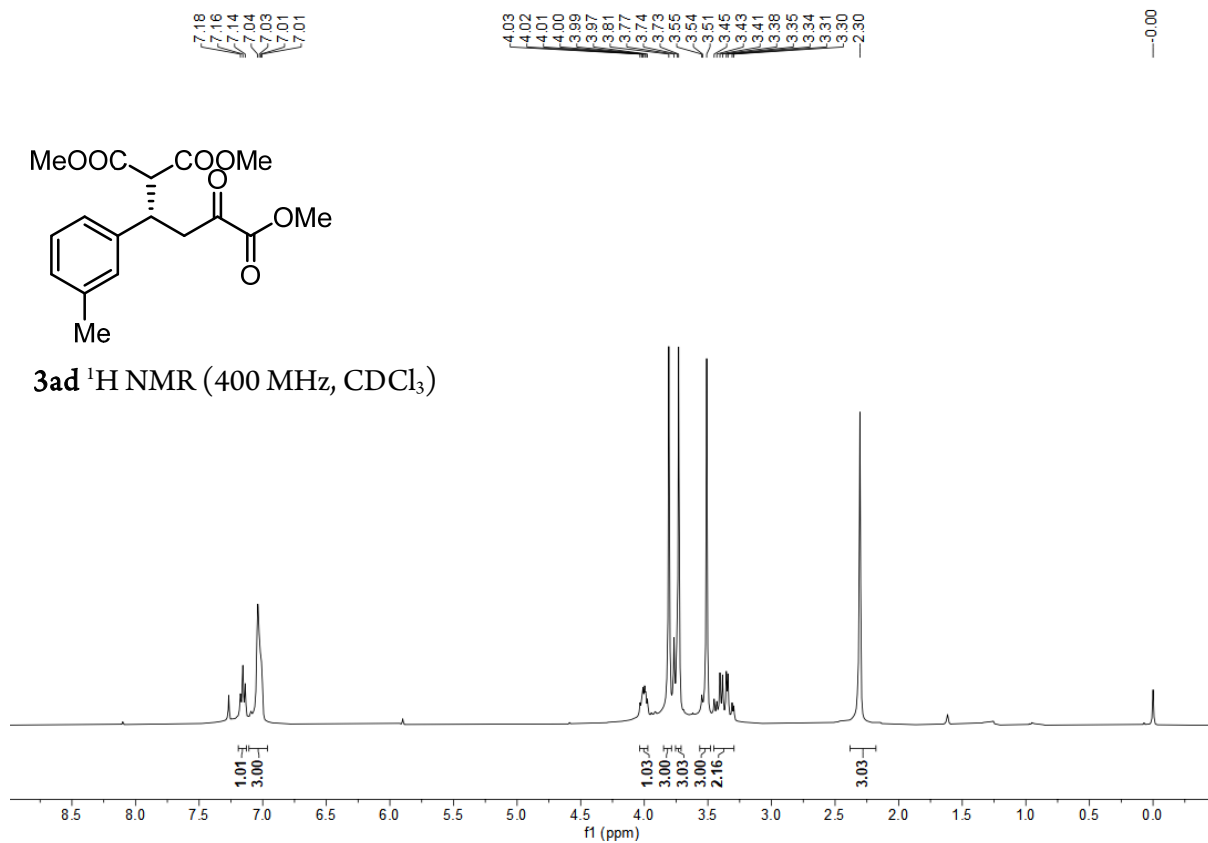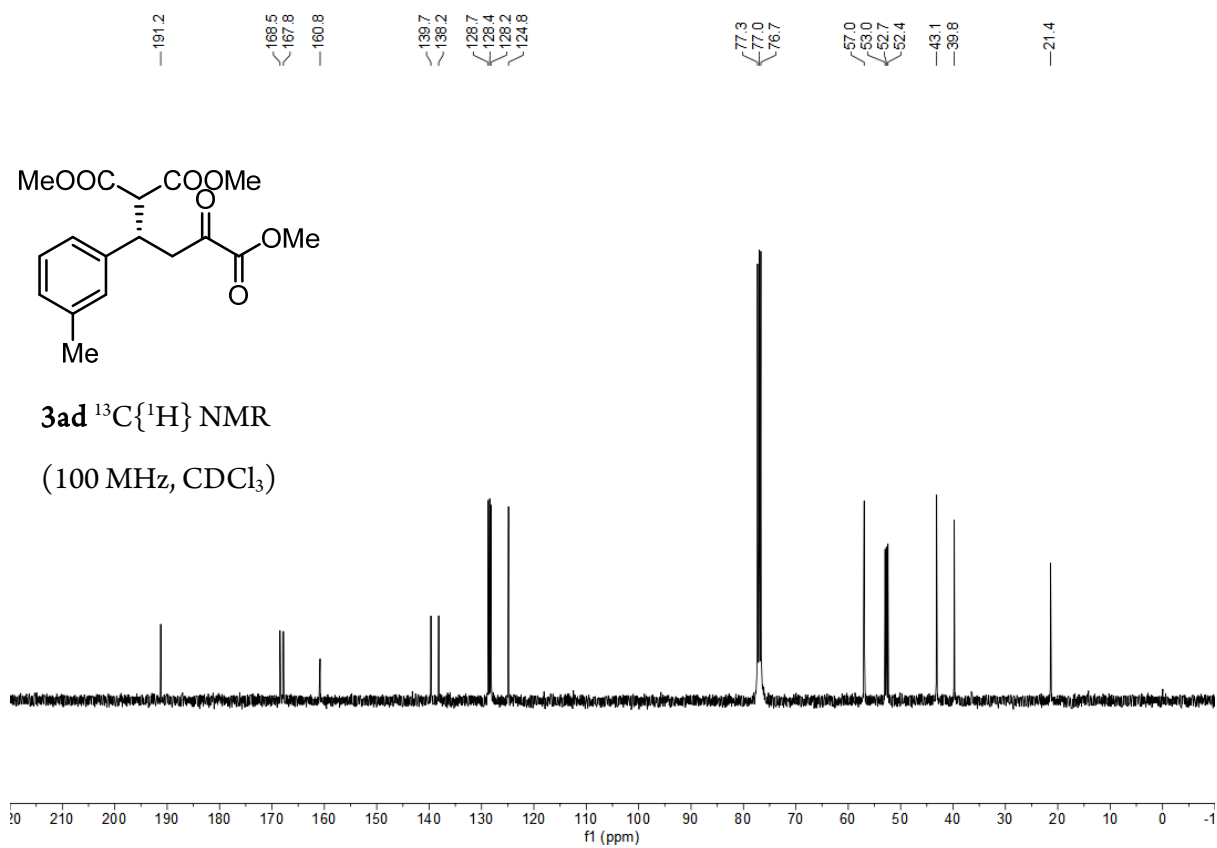



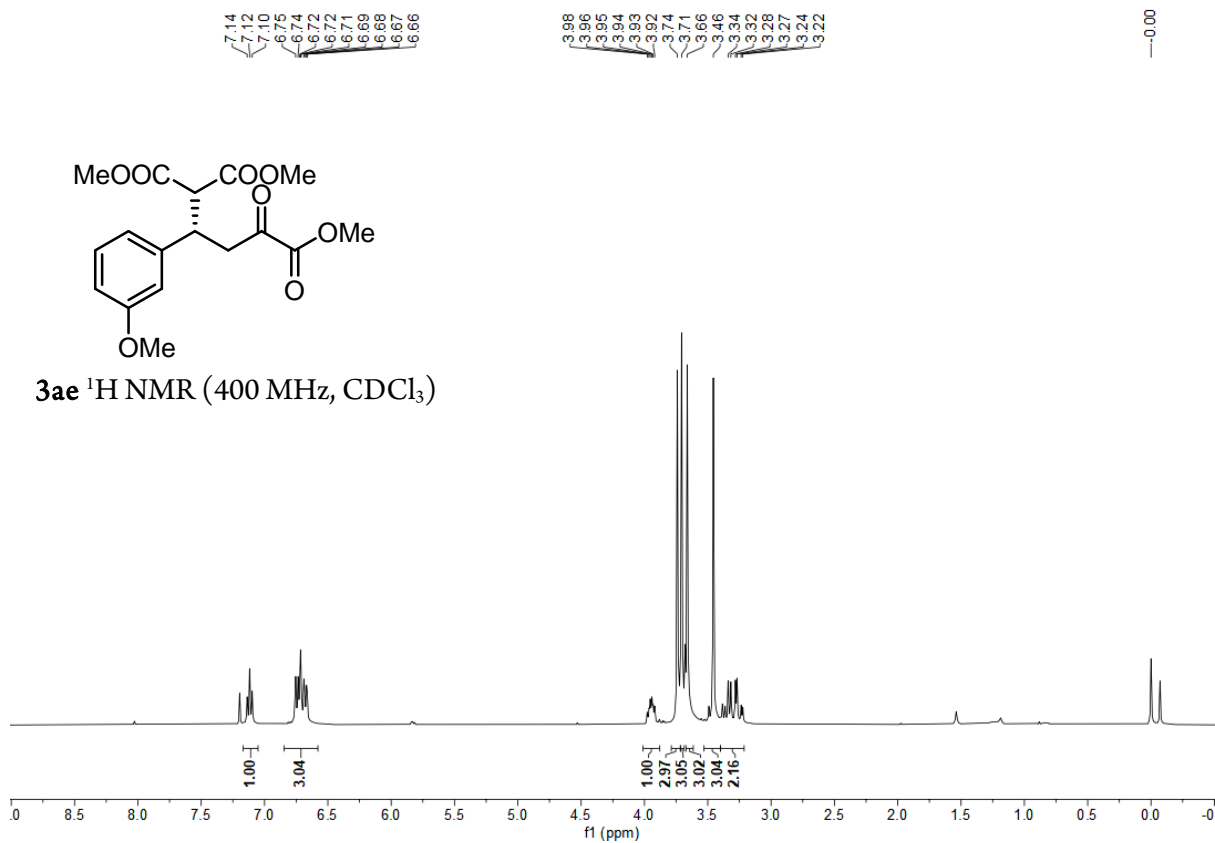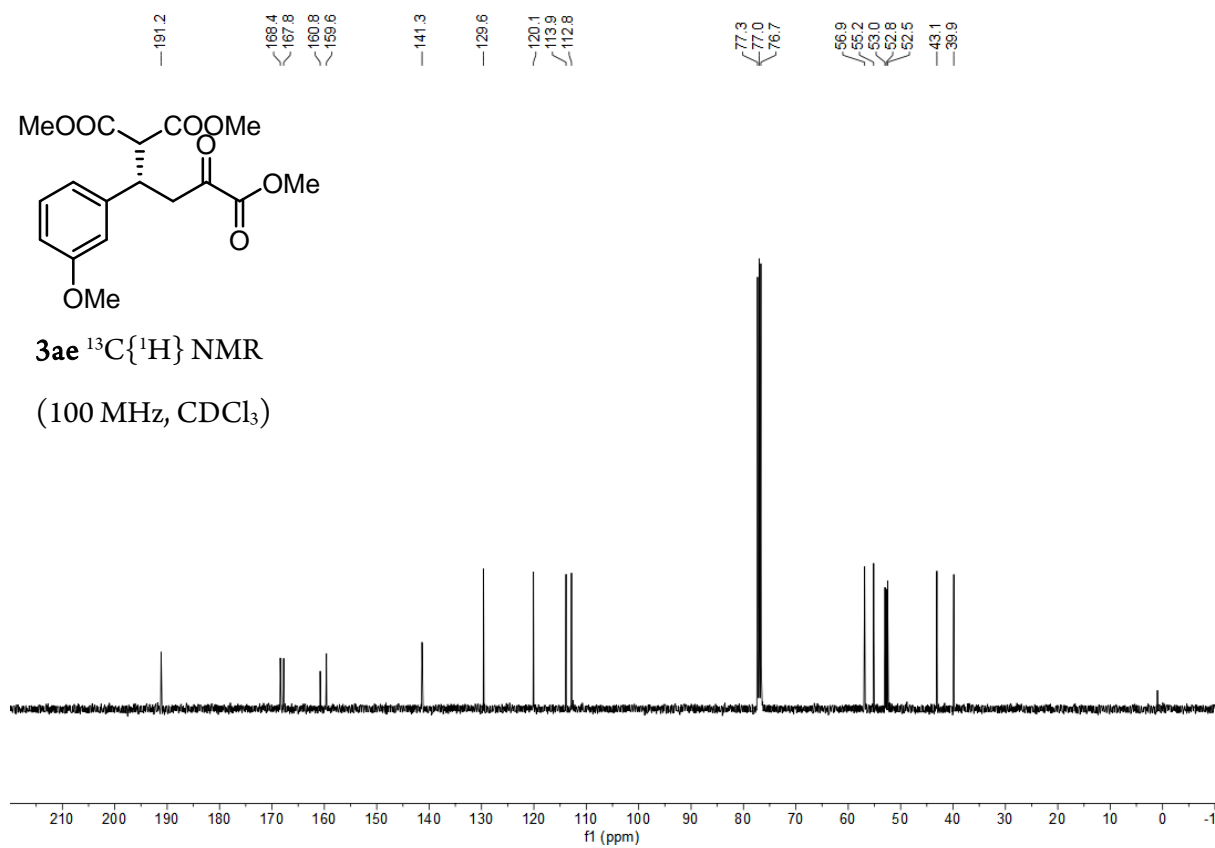

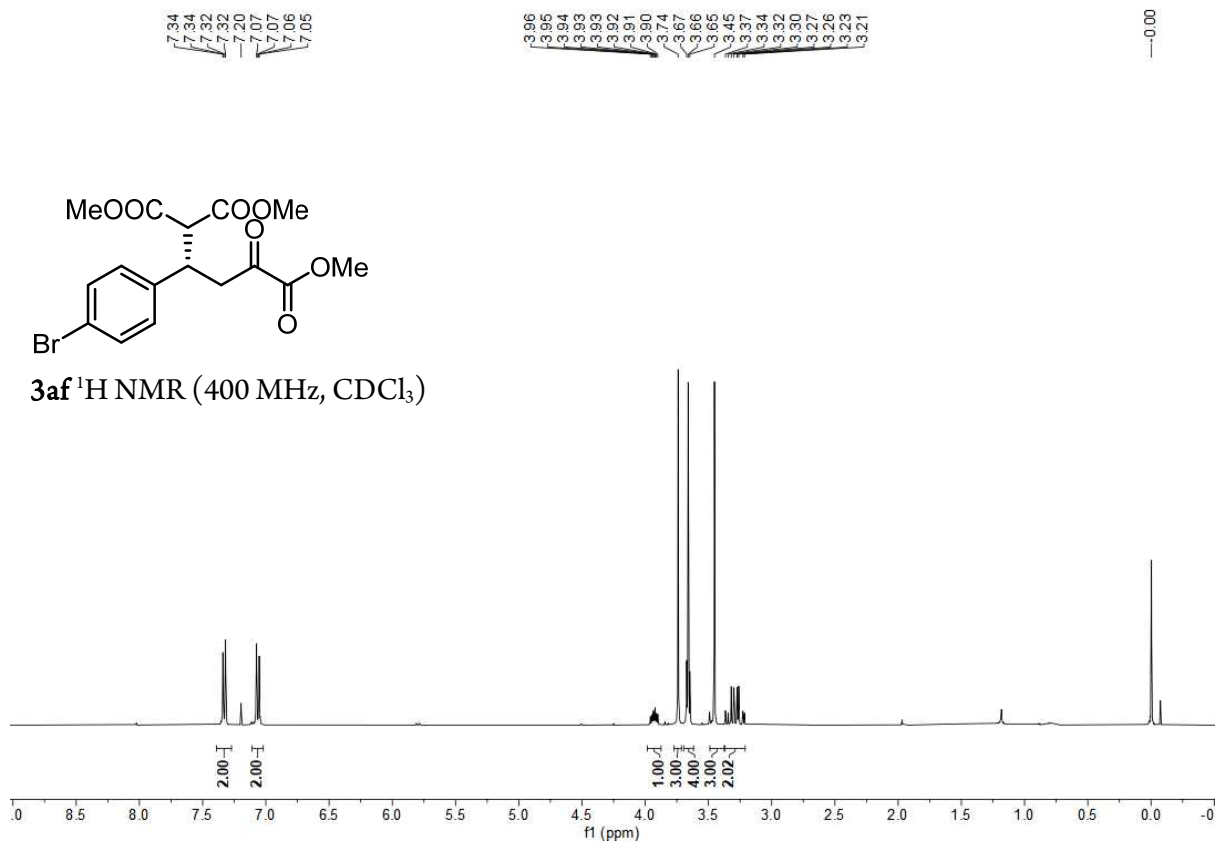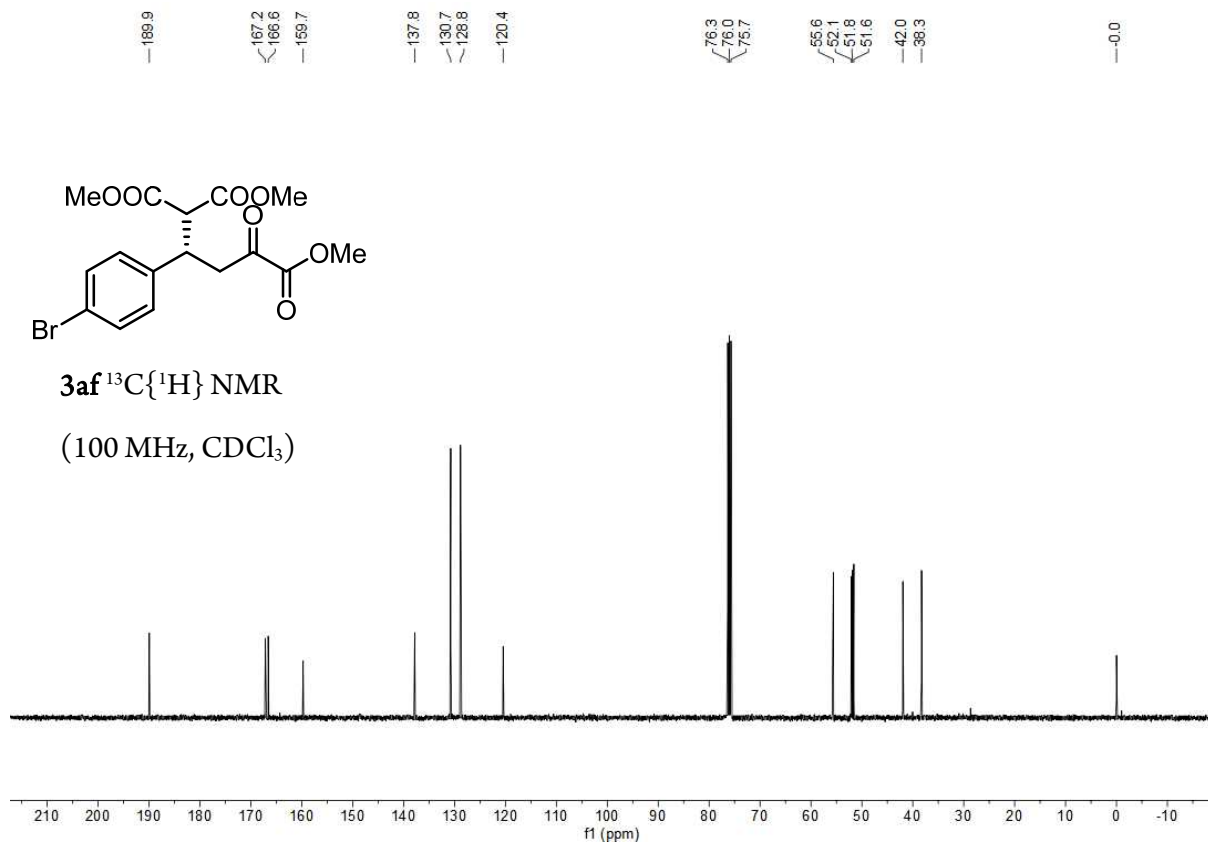

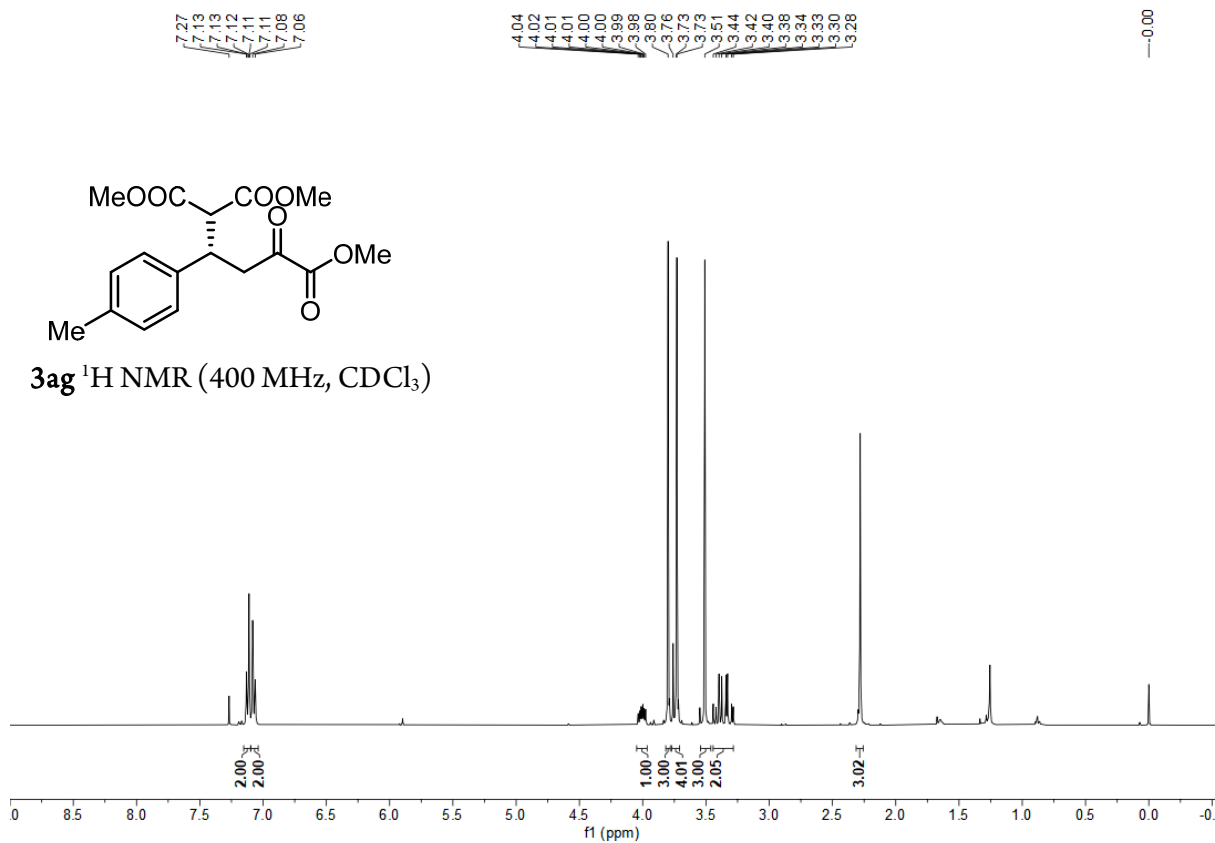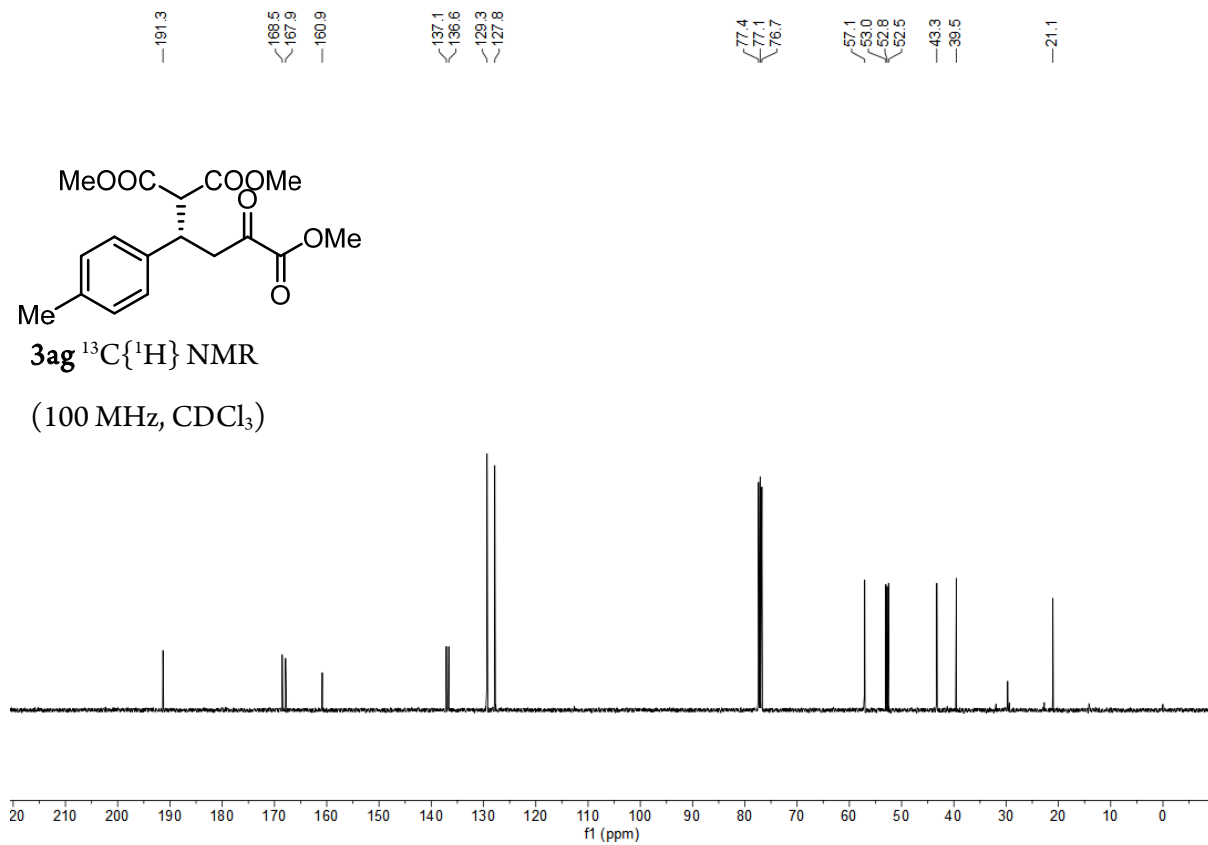

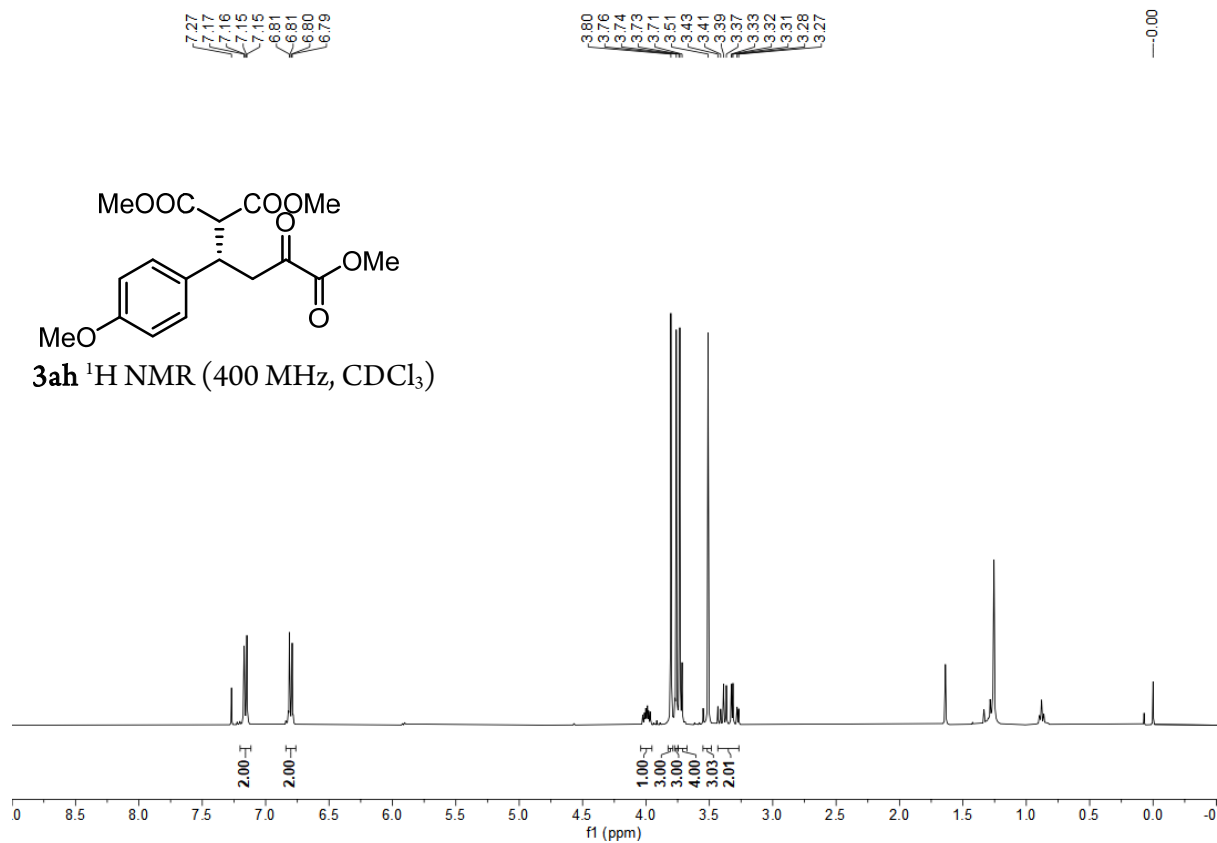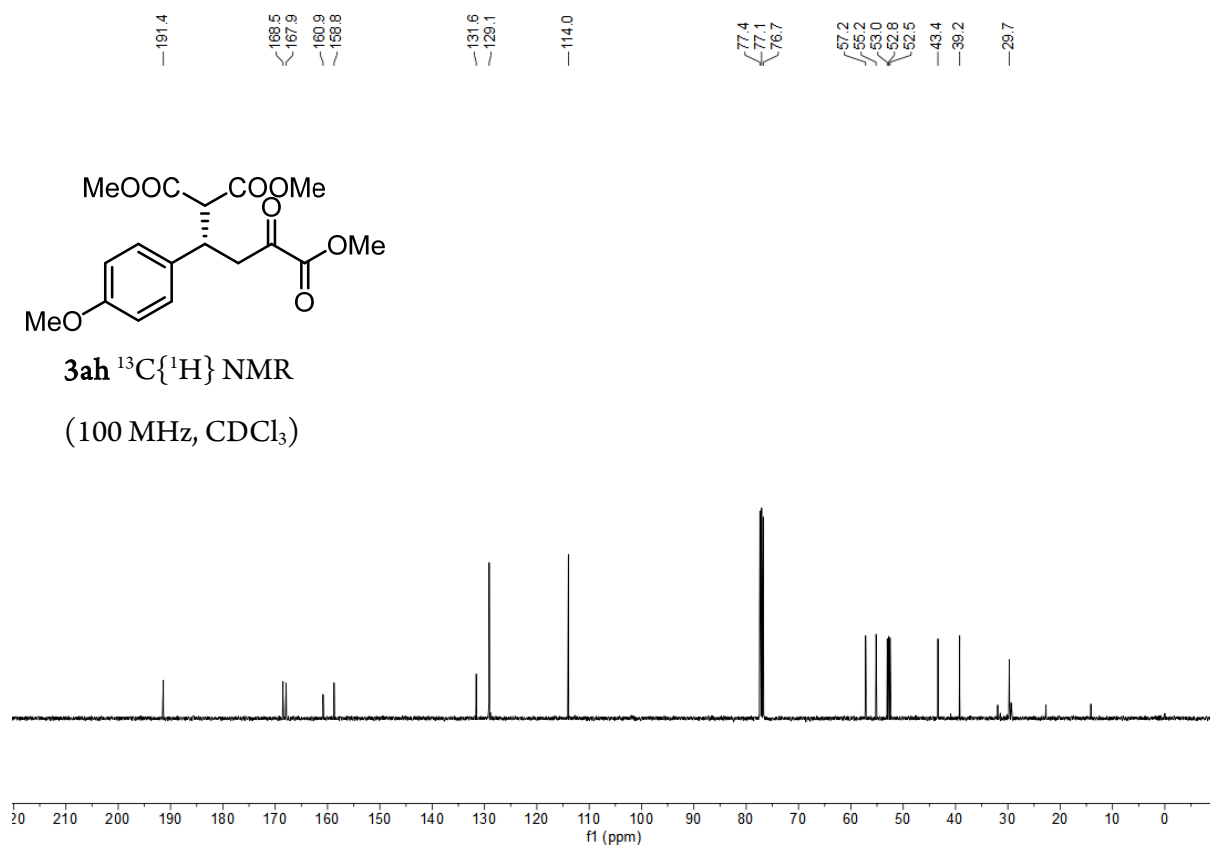

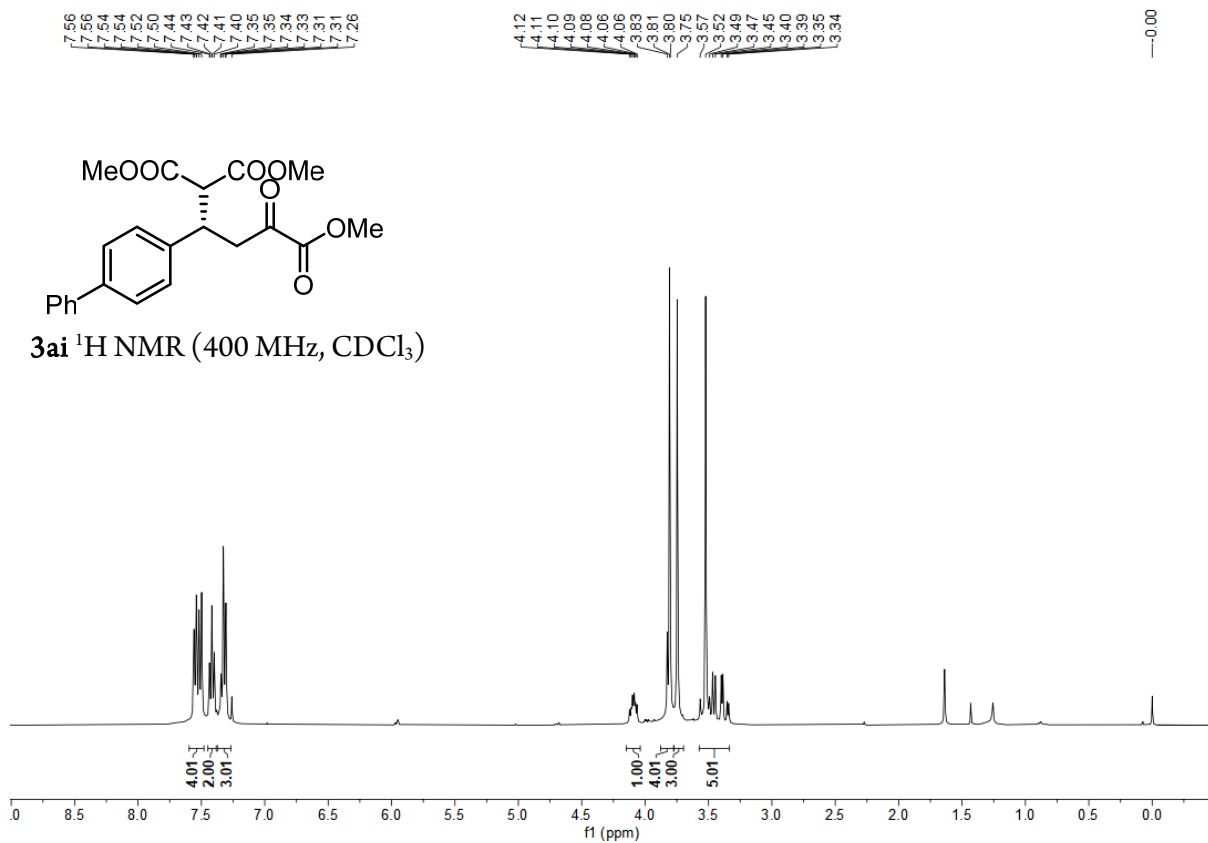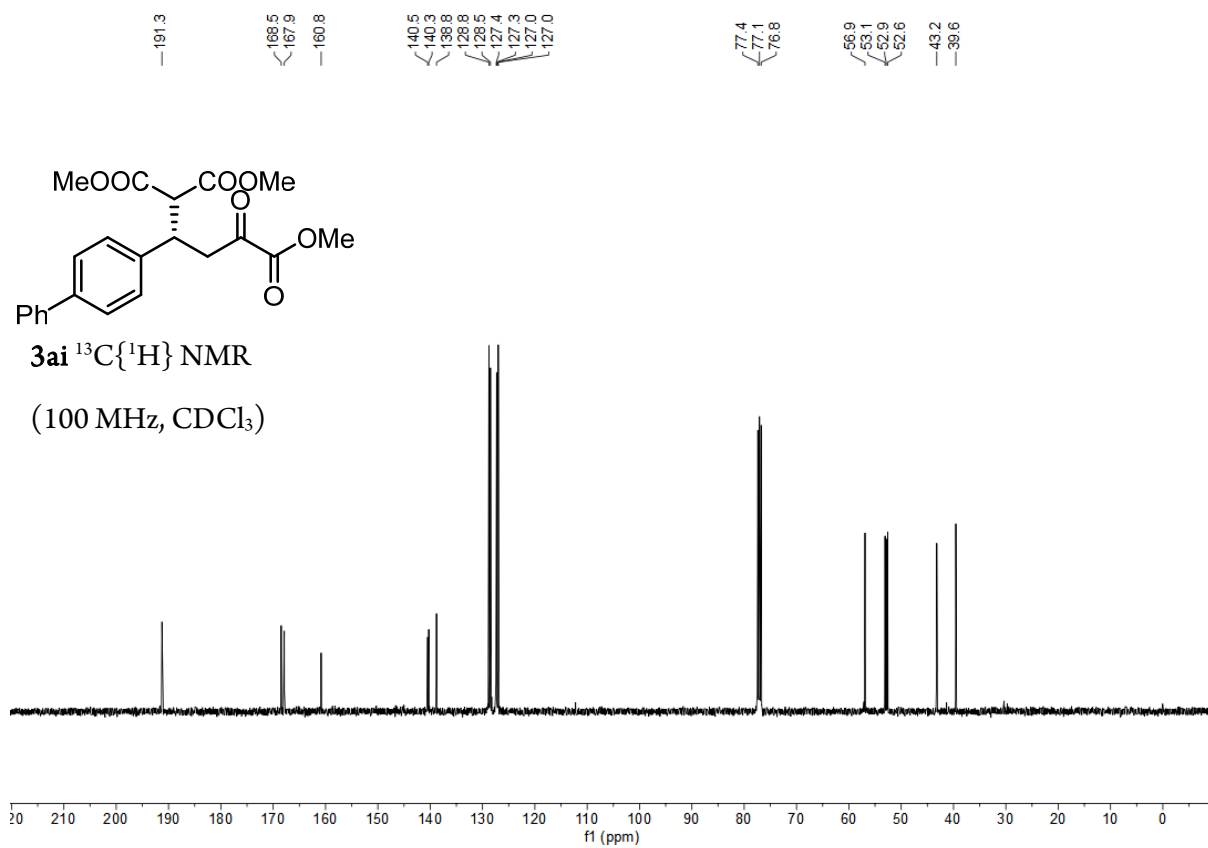

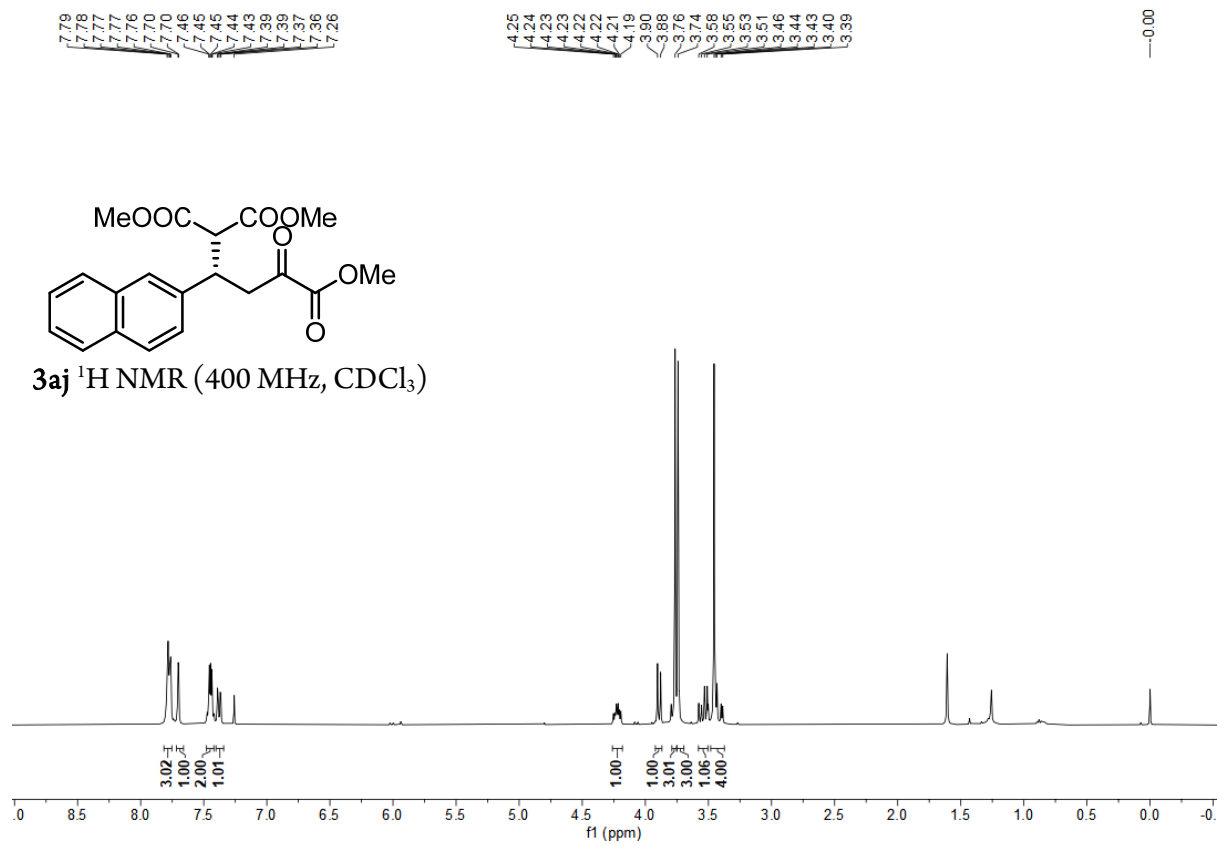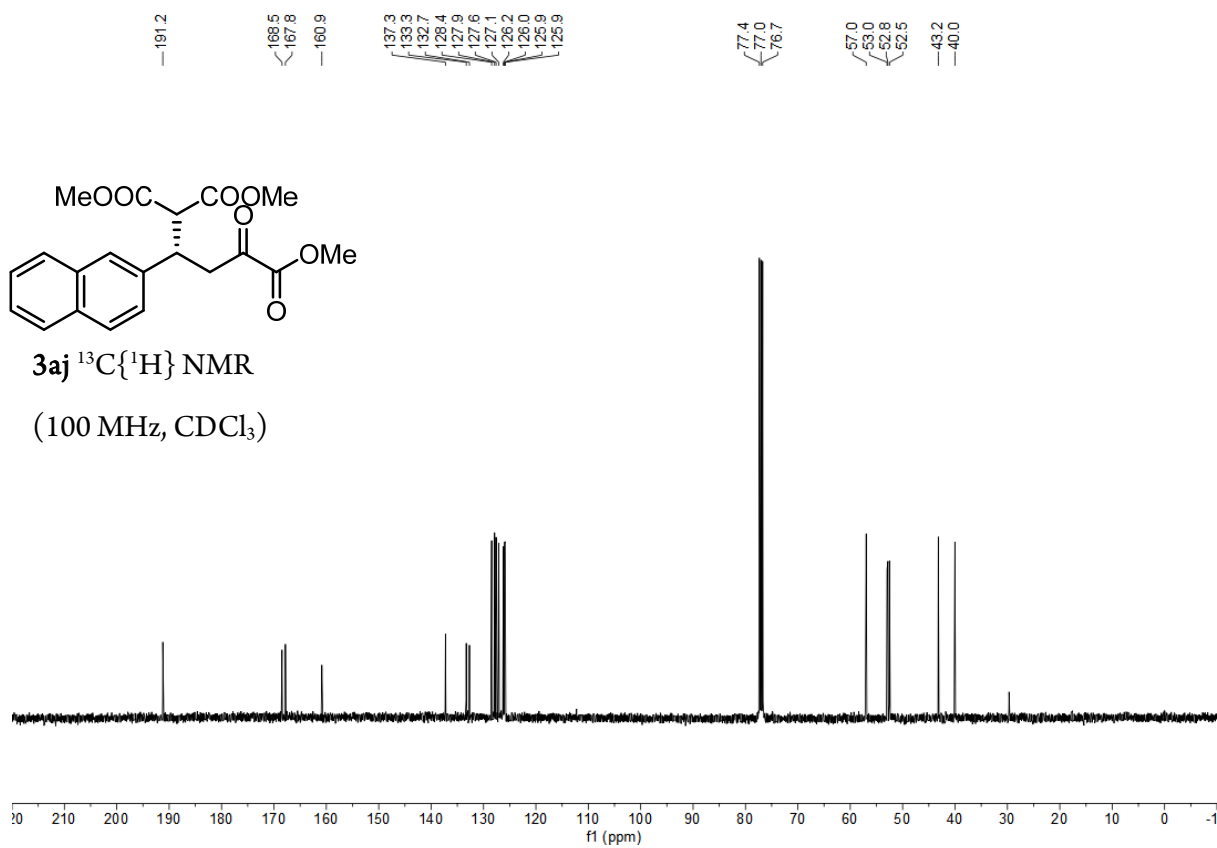

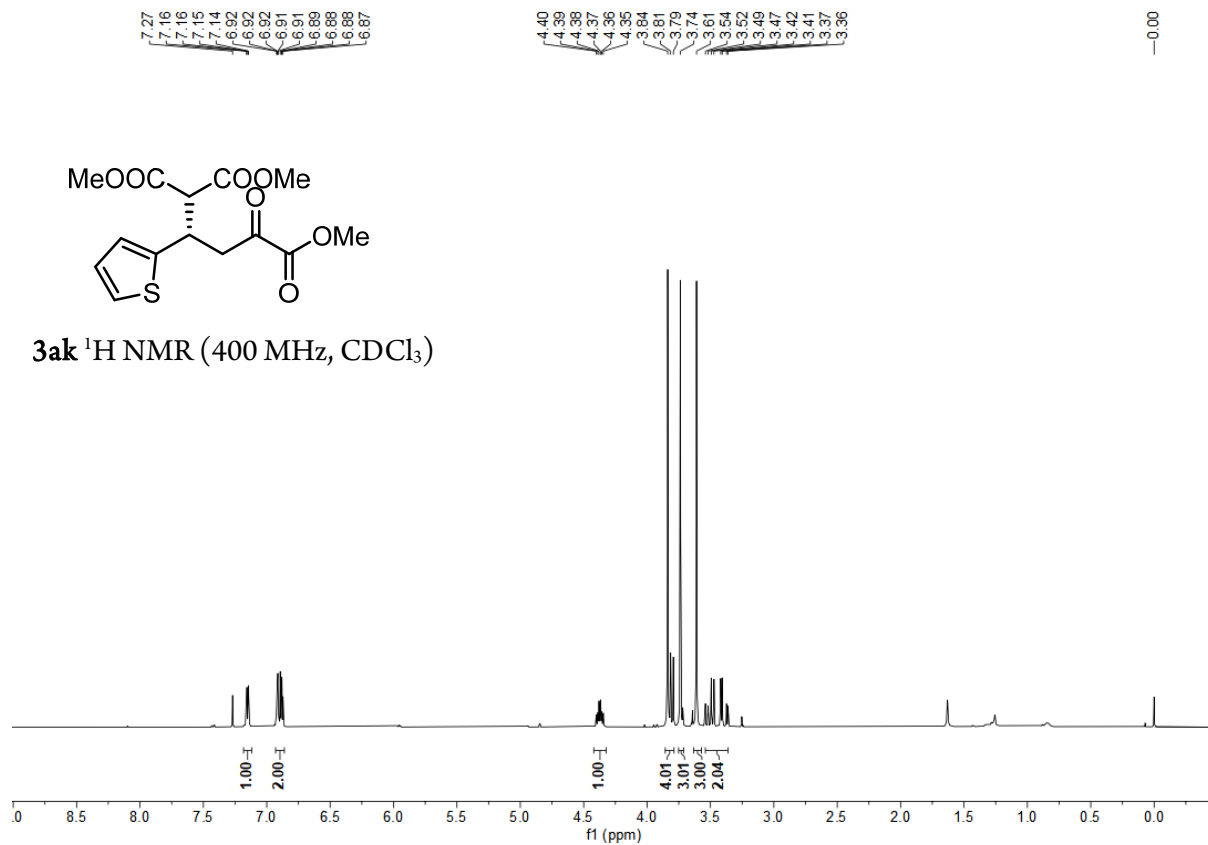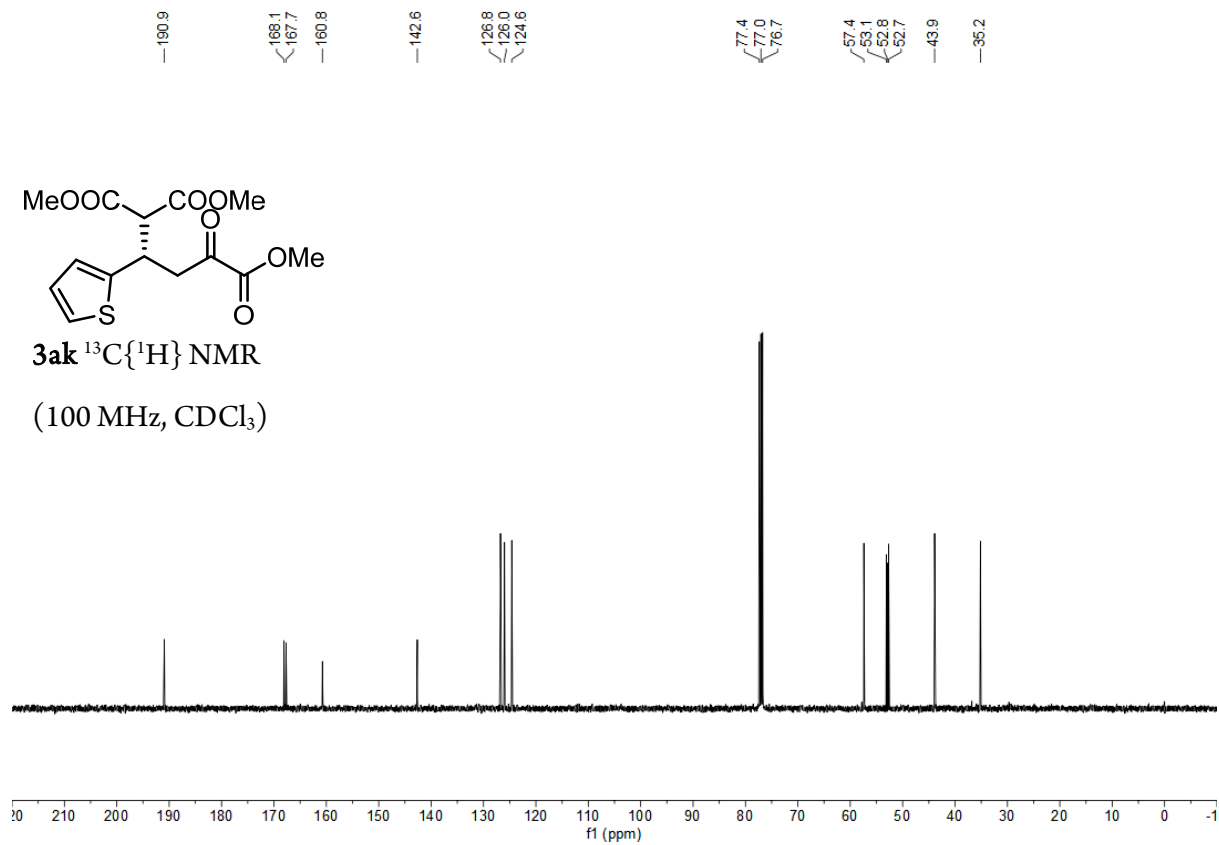

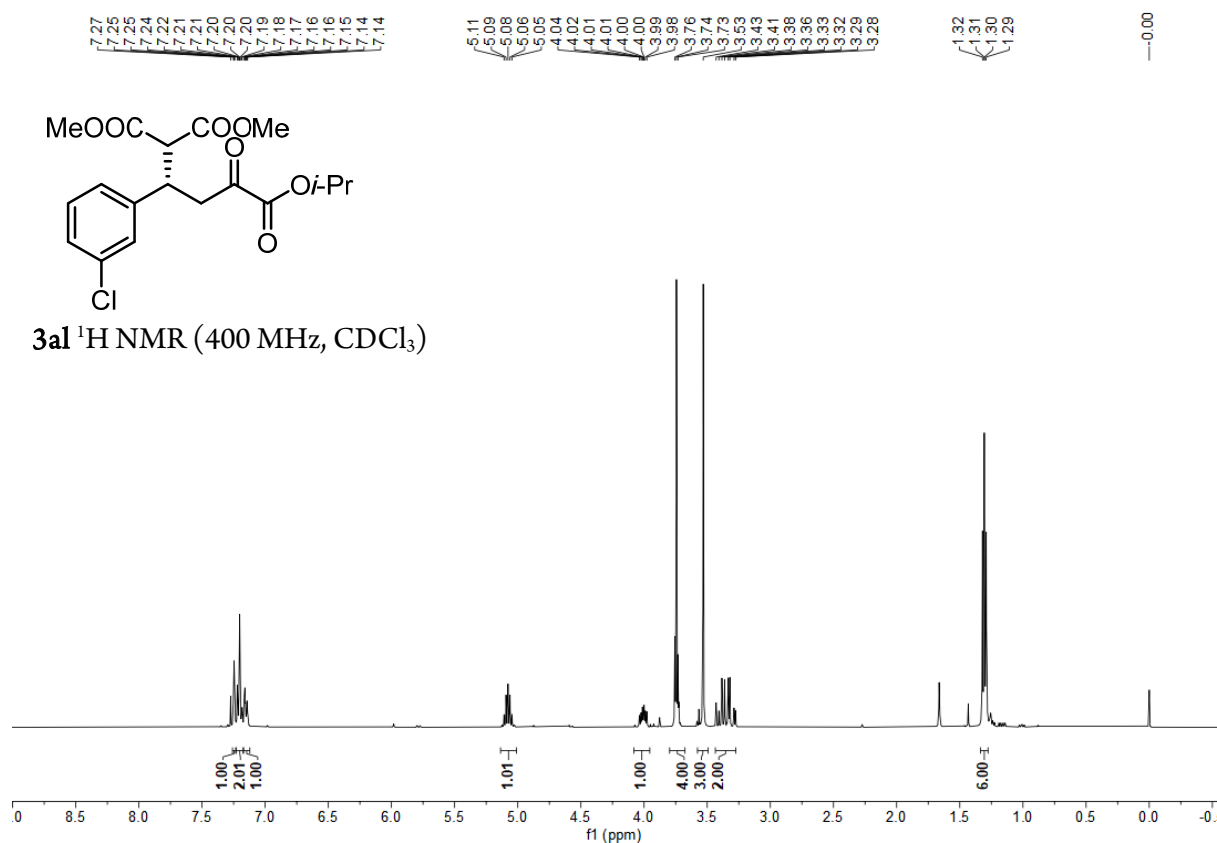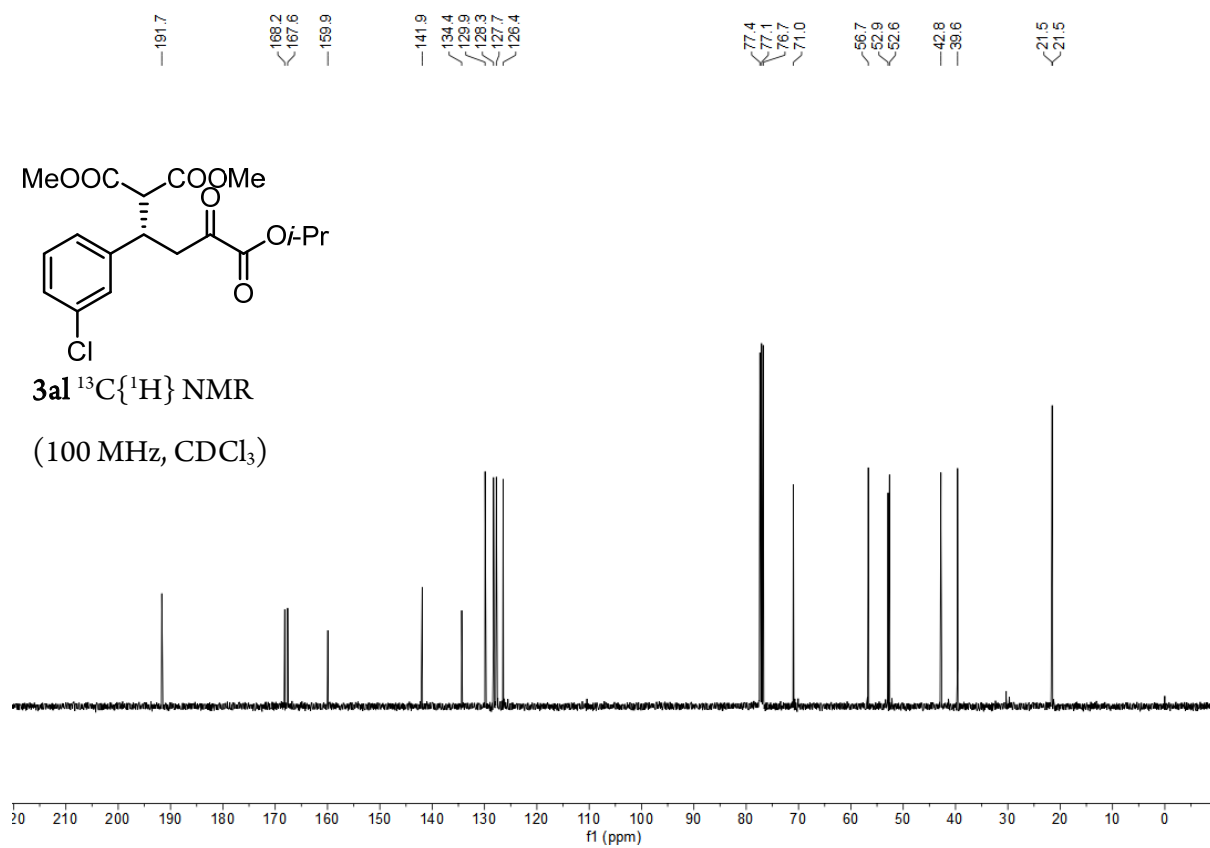



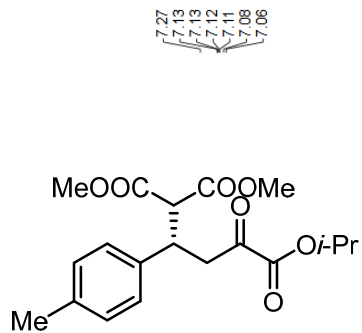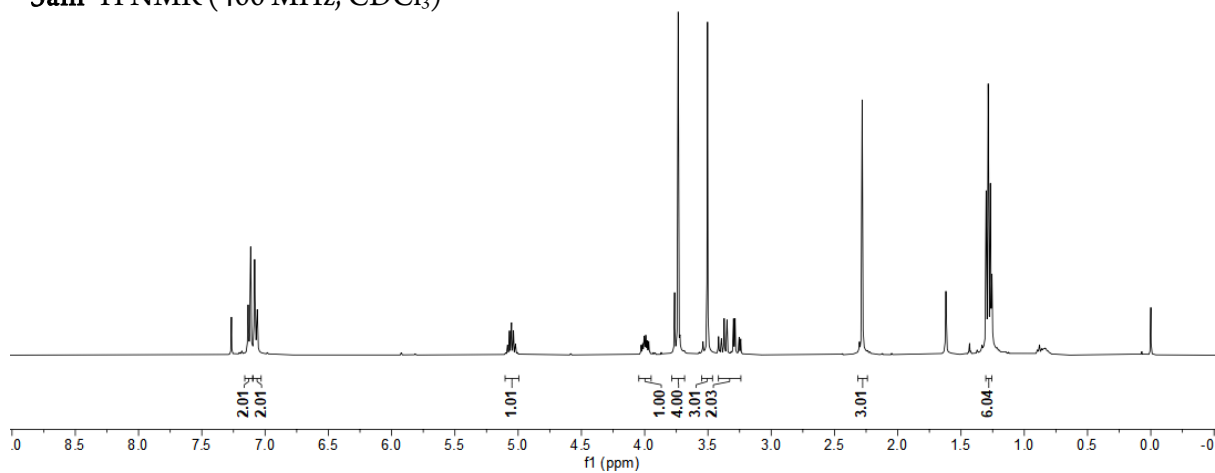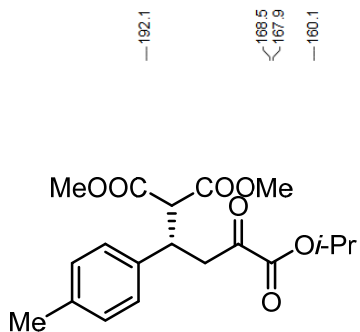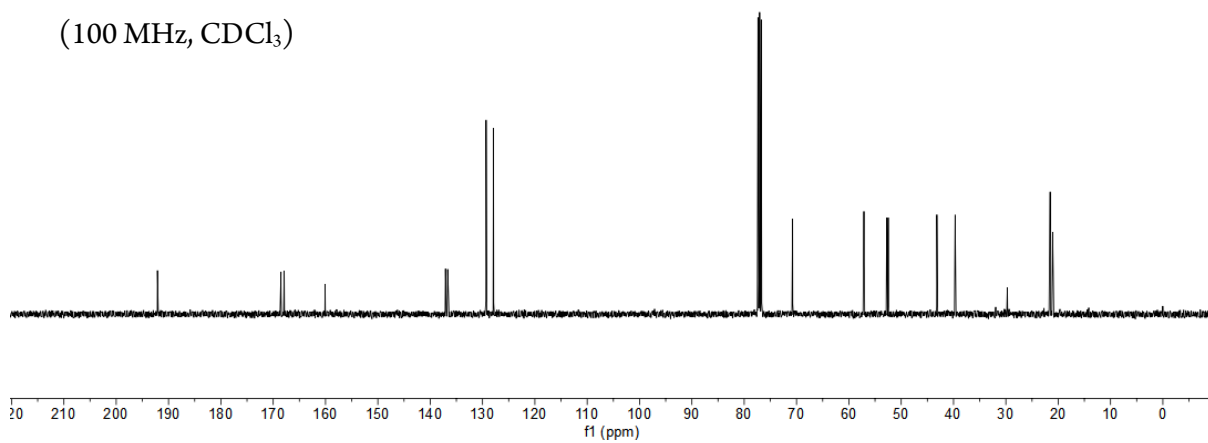

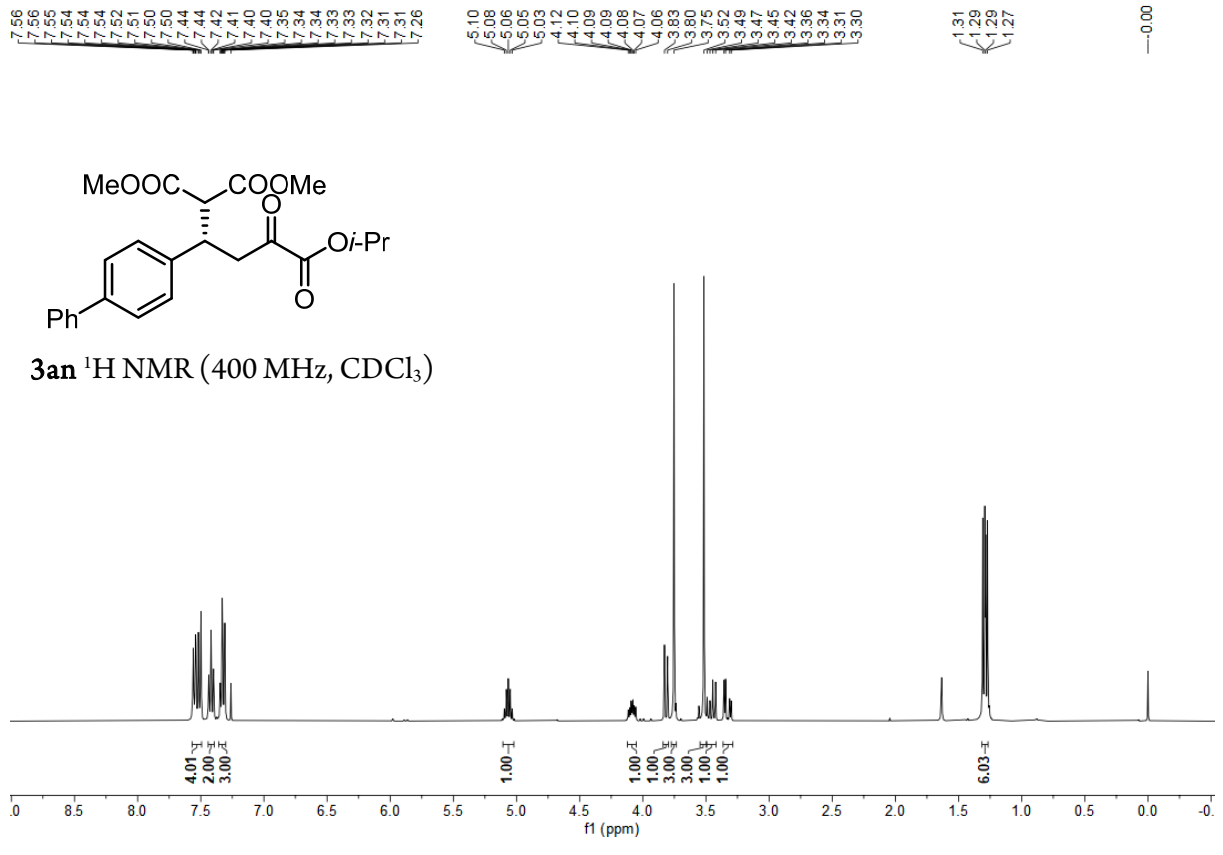

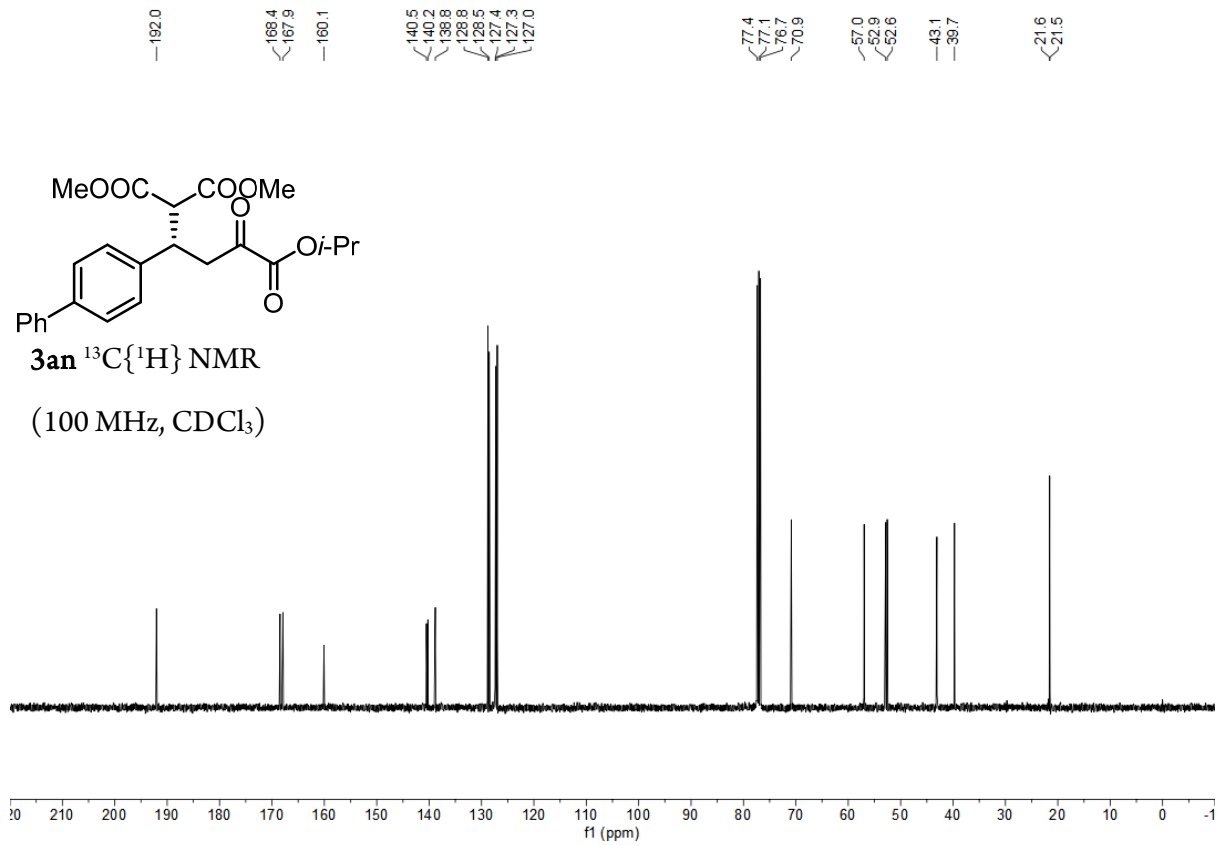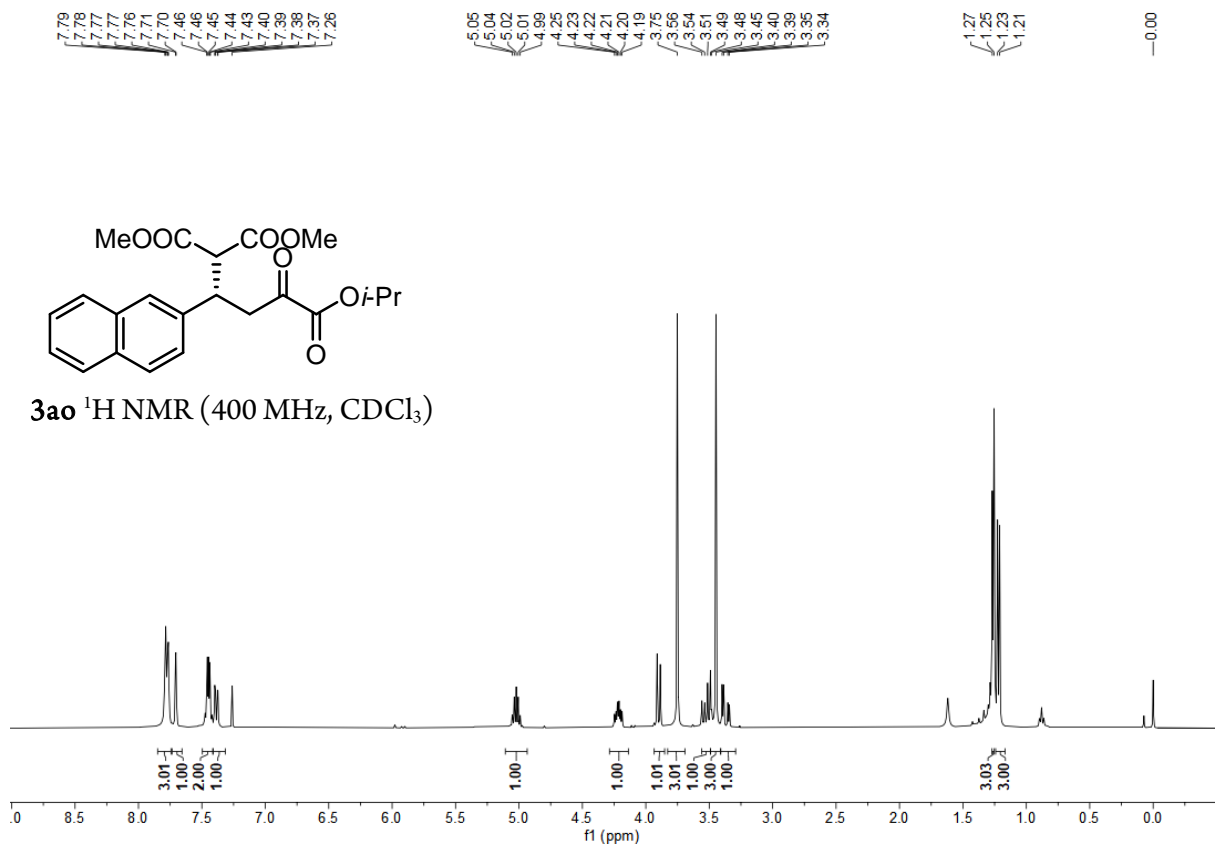

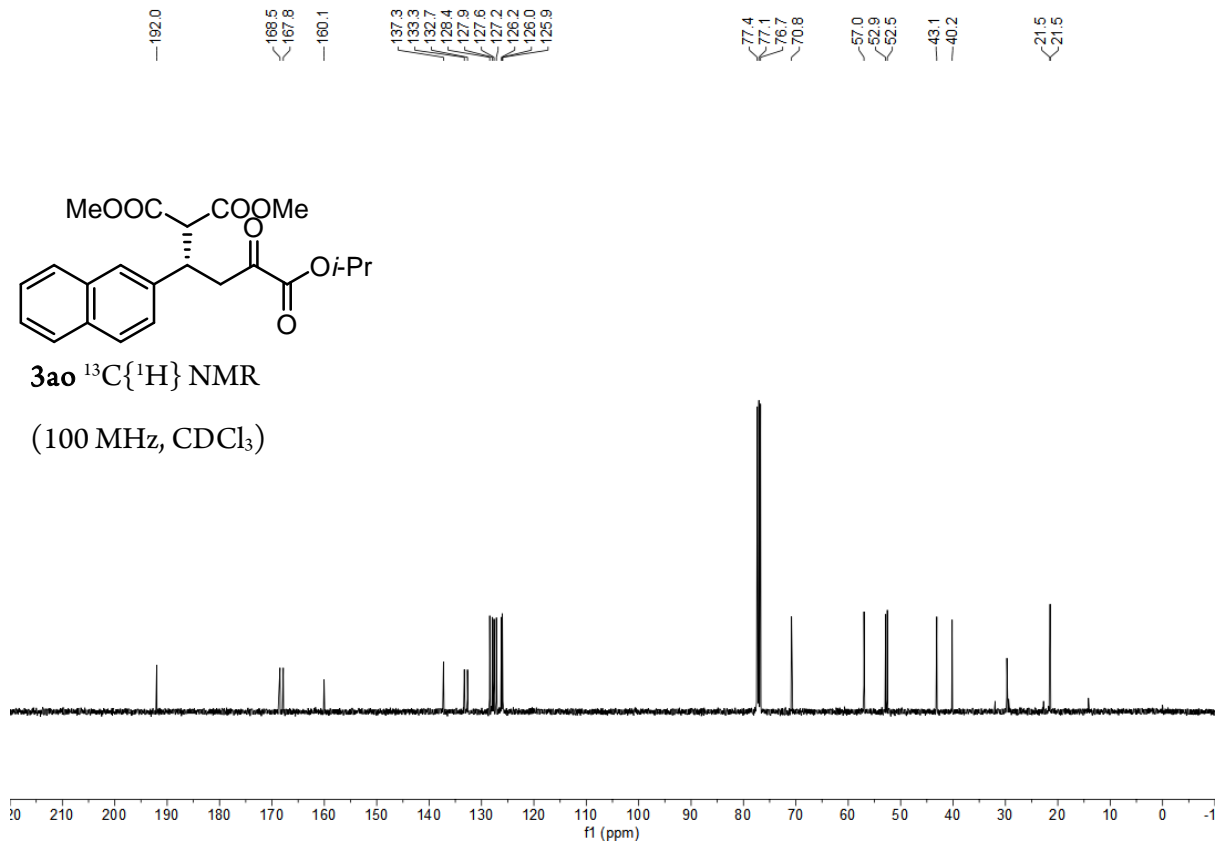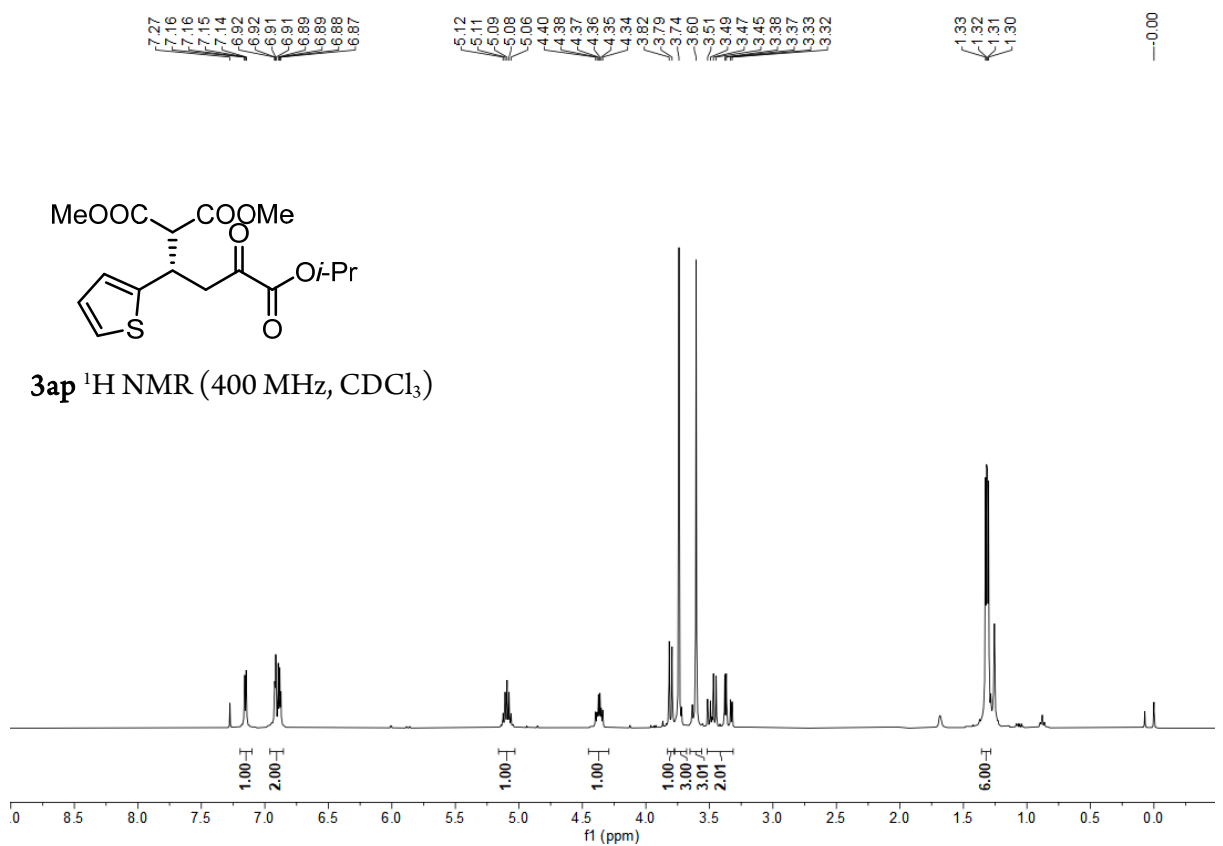

191.7  
168.1  
167.7  
160.0  
142.7  
126.8  
126.0  
124.6  
77.4  
77.1  
76.8  
70.9  
57.4  
52.8  
52.7  
43.8  
35.3  
21.5

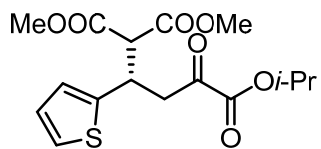

**3ap**  $^{13}\text{C}\{^1\text{H}\}$  NMR

(100 MHz,  $\text{CDCl}_3$ )

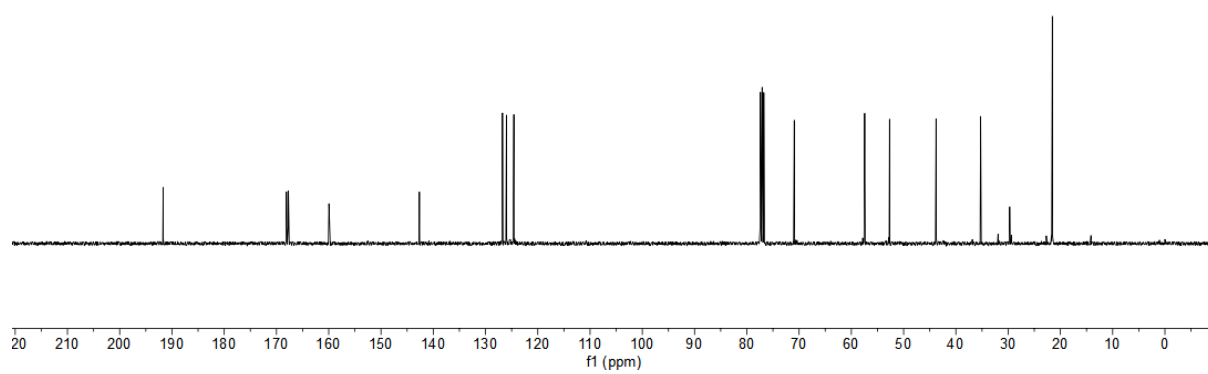

### 3. HPLC Charts of the Products

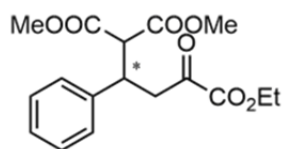

racemic sample:

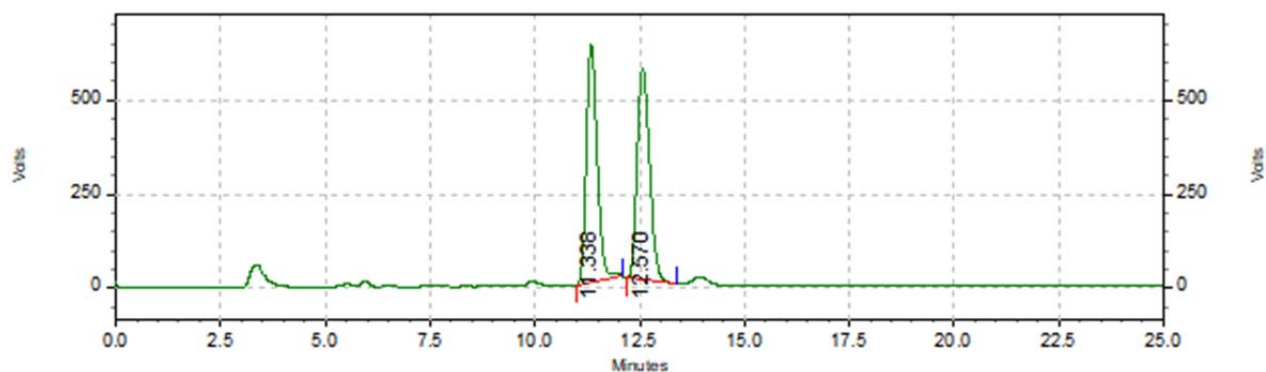

Results:

| Time   | Area     | Area%   | Height  | Height% |
|--------|----------|---------|---------|---------|
| 11.338 | 11502820 | 49.884  | 634118  | 52.980  |
| 12.570 | 11556180 | 50.116  | 562783  | 47.020  |
| Totals | 23059000 | 100.000 | 1196901 | 100.000 |

asymmetric sample:

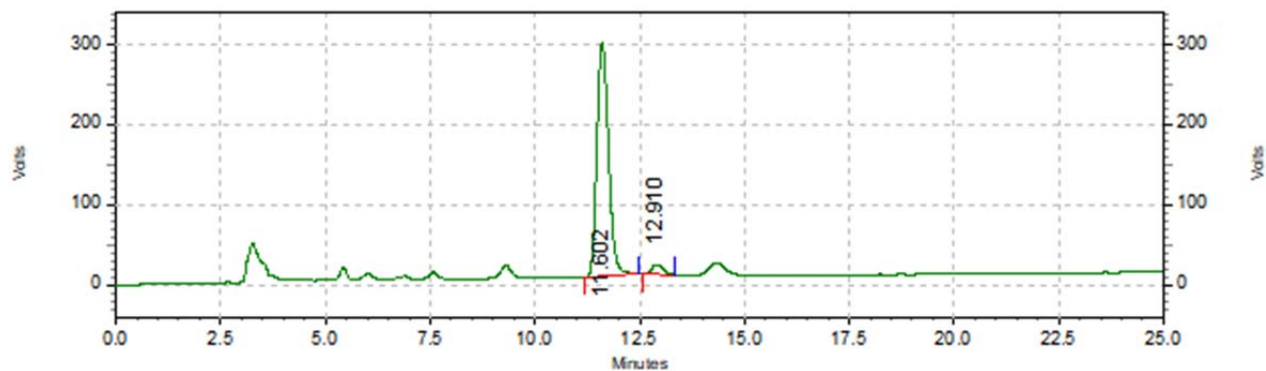

Results:

| Time   | Area    | Area%   | Height | Height% |
|--------|---------|---------|--------|---------|
| 11.602 | 5600099 | 96.009  | 292929 | 95.954  |
| 12.910 | 232775  | 3.991   | 12352  | 4.046   |
| Totals | 5832874 | 100.000 | 305281 | 100.000 |

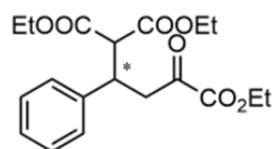

racemic sample:

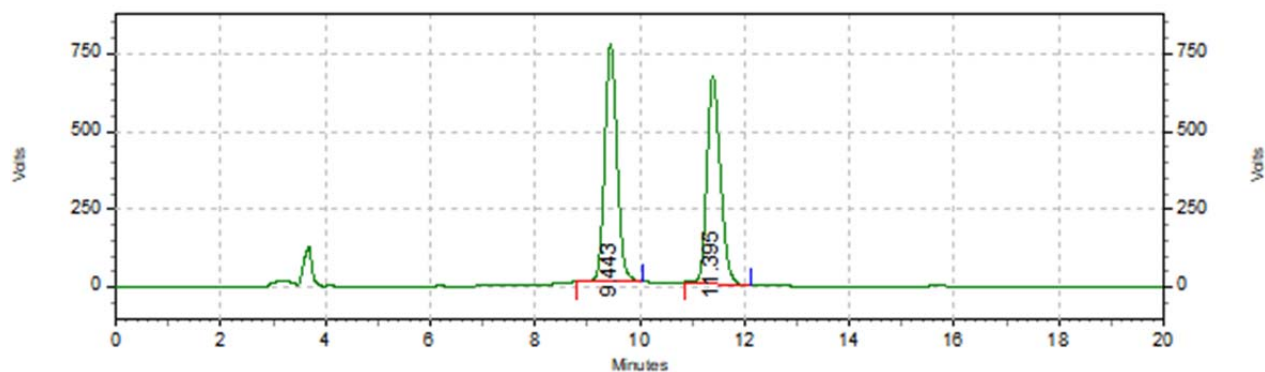

Results:

| Time   | Area     | Area%   | Height  | Height% |
|--------|----------|---------|---------|---------|
| 9.443  | 12461780 | 51.218  | 765253  | 53.497  |
| 11.395 | 11869148 | 48.782  | 665199  | 46.503  |
| Totals | 24330928 | 100.000 | 1430452 | 100.000 |

asymmetric sample:

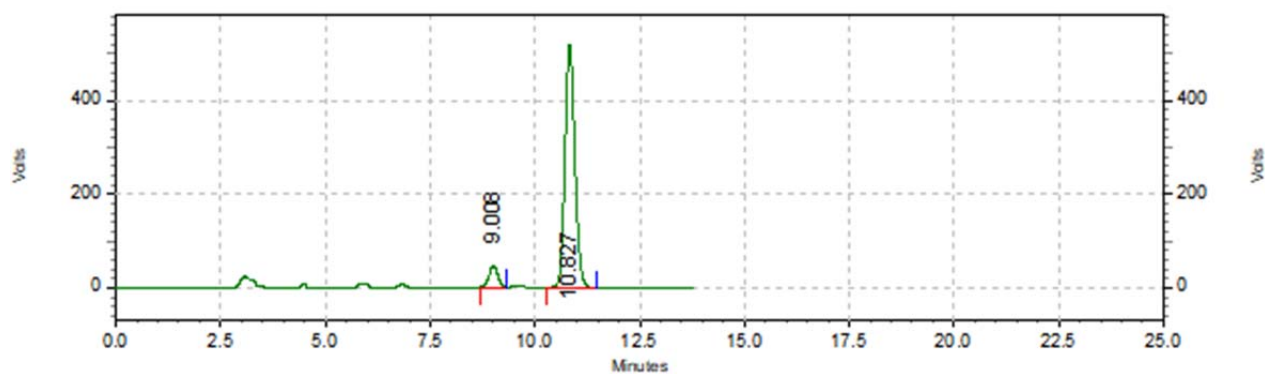

Results:

| Time   | Area    | Area%   | Height | Height% |
|--------|---------|---------|--------|---------|
| 9.008  | 636041  | 6.958   | 45236  | 8.024   |
| 10.827 | 8504647 | 93.042  | 518543 | 91.976  |
| Totals | 9140688 | 100.000 | 563779 | 100.000 |

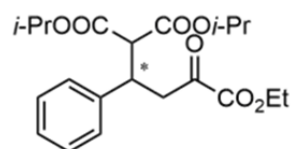

racemic sample:

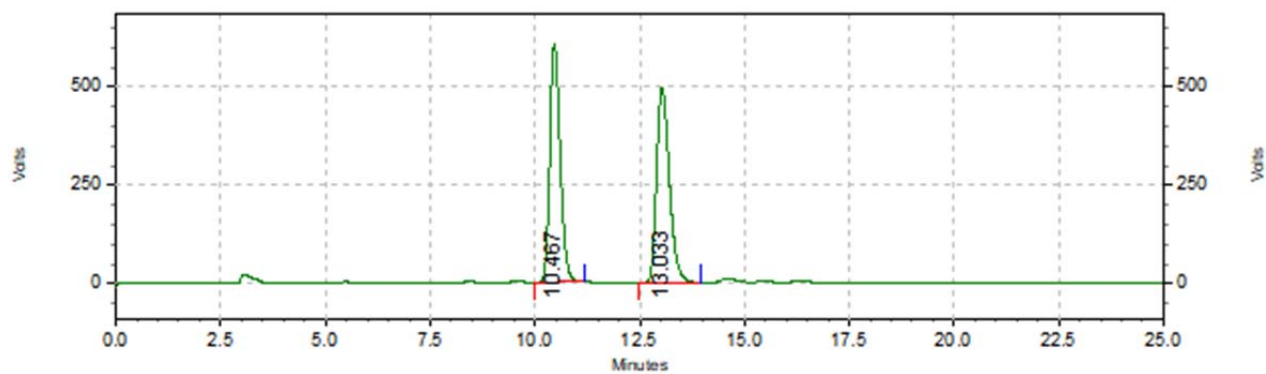

Results:

| Time   | Area     | Area%   | Height  | Height% |
|--------|----------|---------|---------|---------|
| 10.467 | 10440191 | 49.947  | 605618  | 55.029  |
| 13.033 | 10462323 | 50.053  | 494917  | 44.971  |
| Totals | 20902514 | 100.000 | 1100535 | 100.000 |

asymmetric sample:

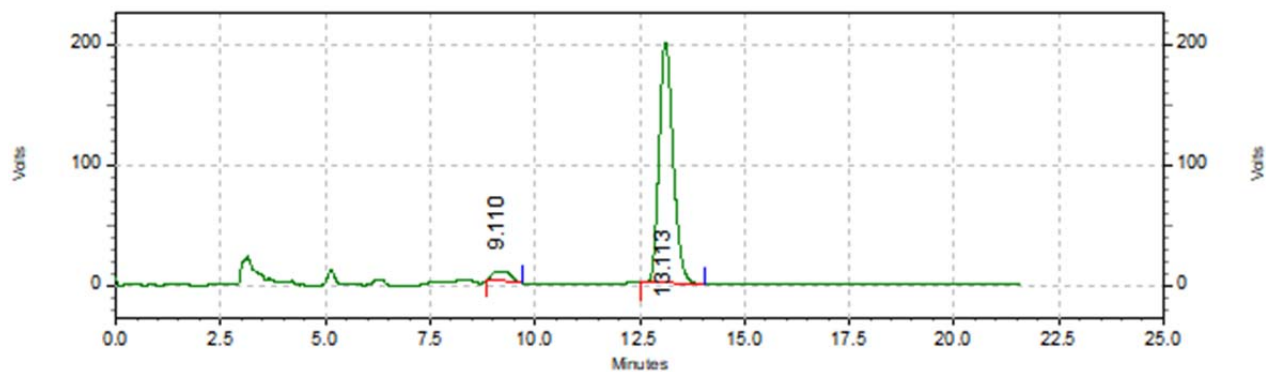

Results:

| Time   | Area    | Area%   | Height | Height% |
|--------|---------|---------|--------|---------|
| 9.110  | 246754  | 4.998   | 8199   | 3.929   |
| 13.113 | 4690089 | 95.002  | 200481 | 96.071  |
| Totals | 4936843 | 100.000 | 208680 | 100.000 |



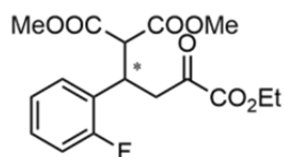

racemic sample:

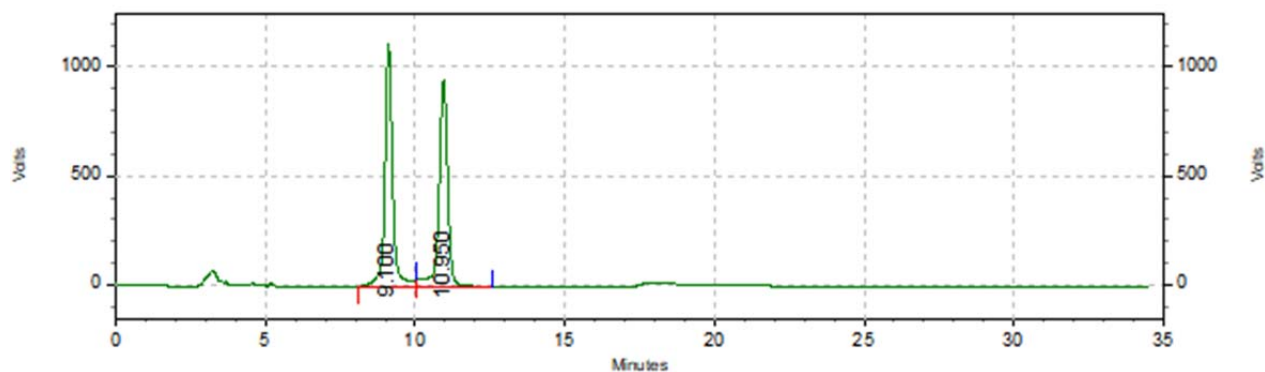

Results:

| Time   | Area     | Area%   | Height  | Height% |
|--------|----------|---------|---------|---------|
| 9.100  | 19871533 | 50.674  | 1115302 | 54.061  |
| 10.950 | 19343297 | 49.326  | 947748  | 45.939  |
| Totals | 39214830 | 100.000 | 2063050 | 100.000 |

asymmetric sample:

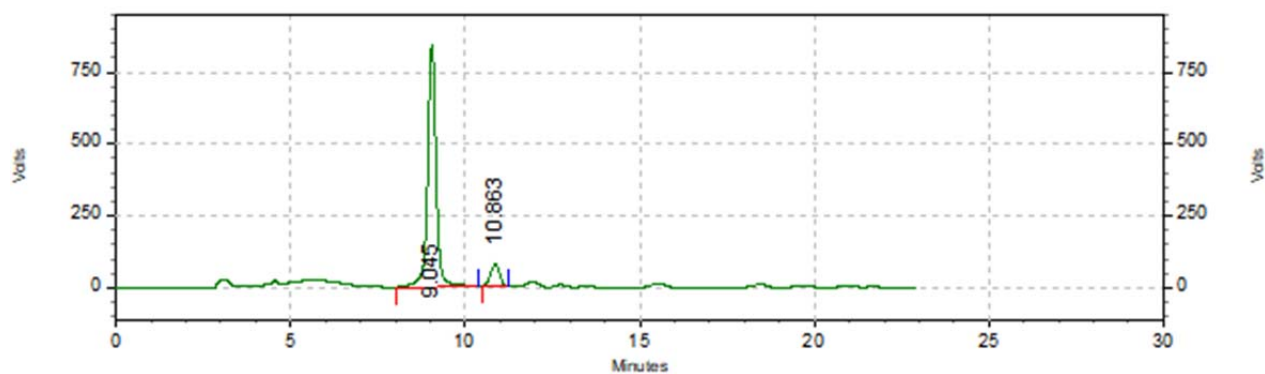

Results:

| Time   | Area     | Area%   | Height | Height% |
|--------|----------|---------|--------|---------|
| 9.045  | 14069328 | 91.038  | 841674 | 91.692  |
| 10.863 | 1384972  | 8.962   | 76264  | 8.308   |
| Totals | 15454300 | 100.000 | 917938 | 100.000 |

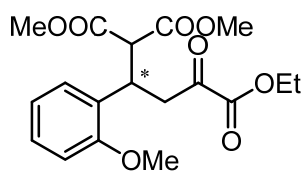

racemic sample:

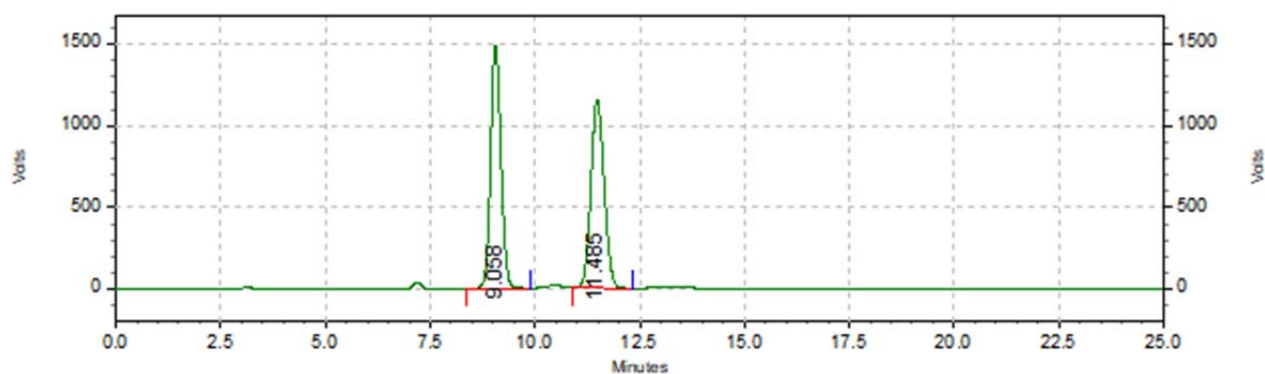

Results:

| Time   | Area     | Area%   | Height  | Height% |
|--------|----------|---------|---------|---------|
| 9.058  | 25682381 | 50.482  | 1482910 | 56.304  |
| 11.485 | 25192064 | 49.518  | 1150855 | 43.696  |
| Totals | 50874445 | 100.000 | 2633765 | 100.000 |

asymmetric sample:

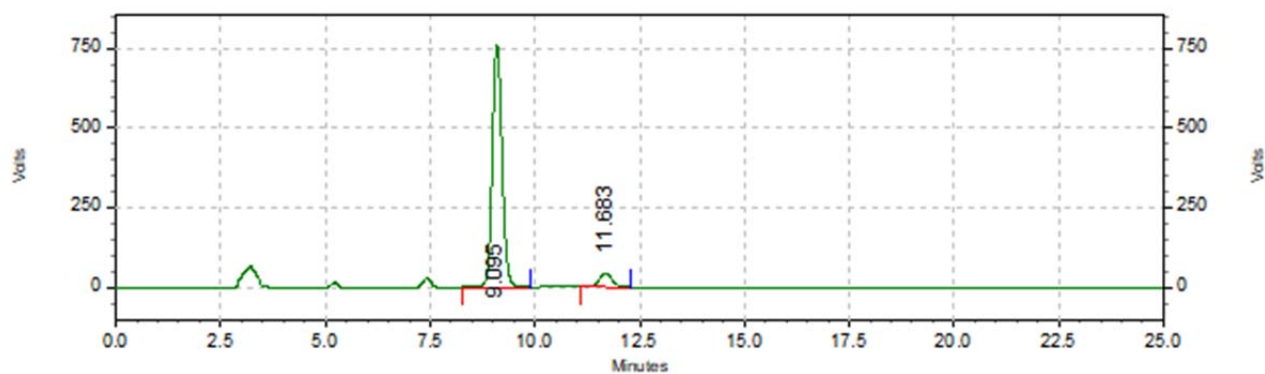

Results:

| Time   | Area     | Area%   | Height | Height% |
|--------|----------|---------|--------|---------|
| 9.095  | 12172161 | 93.114  | 756929 | 94.627  |
| 11.683 | 900138   | 6.886   | 42977  | 5.373   |
| Totals | 13072299 | 100.000 | 799906 | 100.000 |

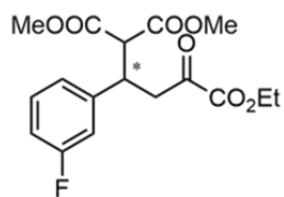

racemic sample:

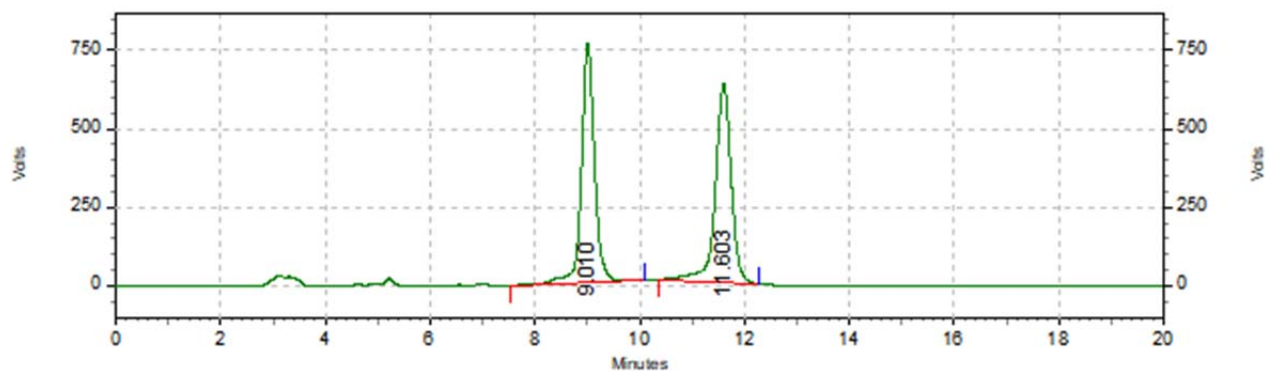

Results:

| Time   | Area     | Area%   | Height  | Height% |
|--------|----------|---------|---------|---------|
| 9.010  | 13240711 | 49.643  | 761344  | 54.665  |
| 11.603 | 13431347 | 50.357  | 631391  | 45.335  |
| Totals | 26672058 | 100.000 | 1392735 | 100.000 |

asymmetric sample:

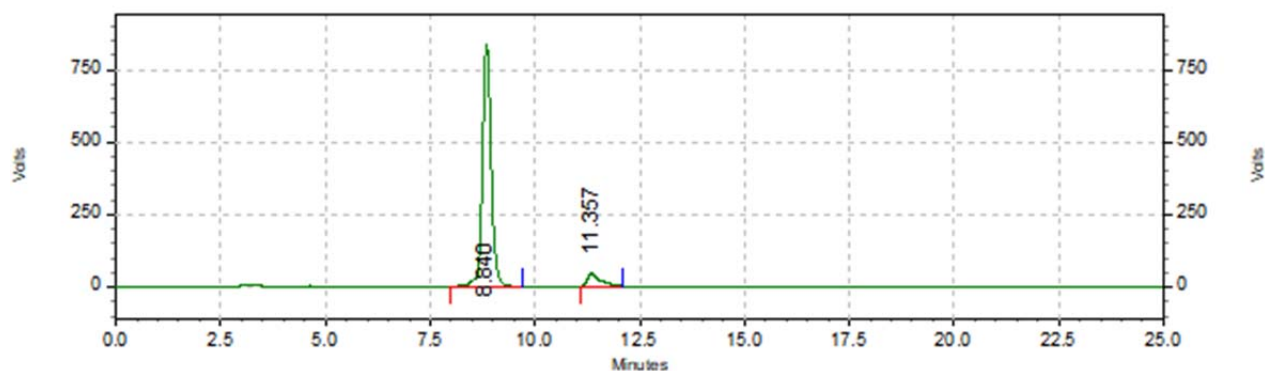

Results:

| Time   | Area     | Area%   | Height | Height% |
|--------|----------|---------|--------|---------|
| 8.840  | 12020711 | 92.715  | 834668 | 95.067  |
| 11.357 | 944495   | 7.285   | 43313  | 4.933   |
| Totals | 12965206 | 100.000 | 877981 | 100.000 |

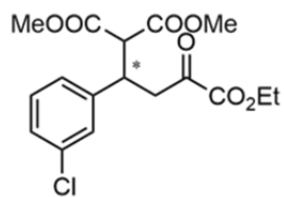

racemic sample:

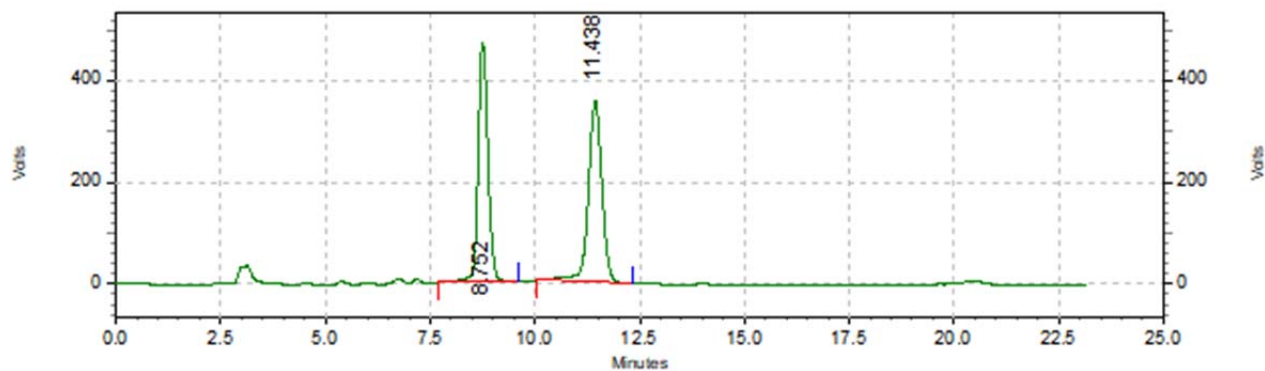

Results:

| Time   | Area     | Area%   | Height | Height% |
|--------|----------|---------|--------|---------|
| 8.752  | 7568497  | 48.131  | 470996 | 56.871  |
| 11.438 | 8156431  | 51.869  | 357183 | 43.129  |
| Totals | 15724928 | 100.000 | 828179 | 100.000 |

asymmetric sample:

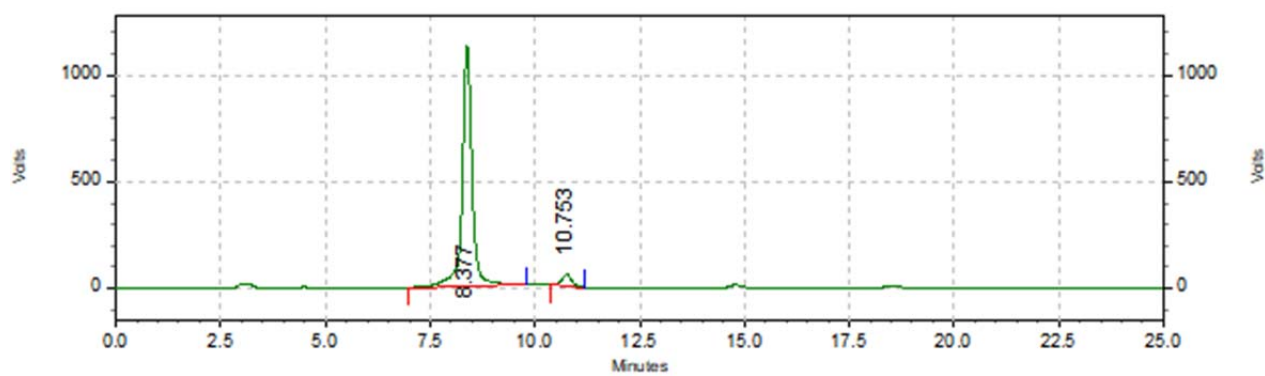

Results:

| Time   | Area     | Area%   | Height  | Height% |
|--------|----------|---------|---------|---------|
| 8.377  | 18807653 | 95.450  | 1130786 | 95.484  |
| 10.753 | 896475   | 4.550   | 53482   | 4.516   |
| Totals | 19704128 | 100.000 | 1184268 | 100.000 |

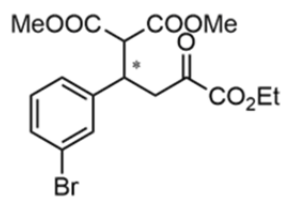

racemic sample:

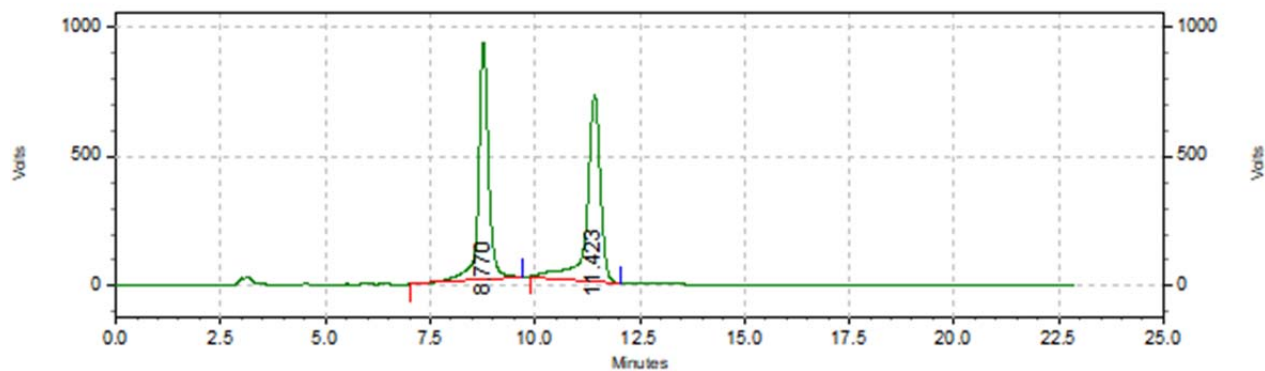

Results:

| Time   | Area     | Area%   | Height  | Height% |
|--------|----------|---------|---------|---------|
| 8.770  | 15280966 | 48.654  | 916455  | 55.874  |
| 11.423 | 16126217 | 51.346  | 723763  | 44.126  |
| Totals | 31407183 | 100.000 | 1640218 | 100.000 |

asymmetric sample:

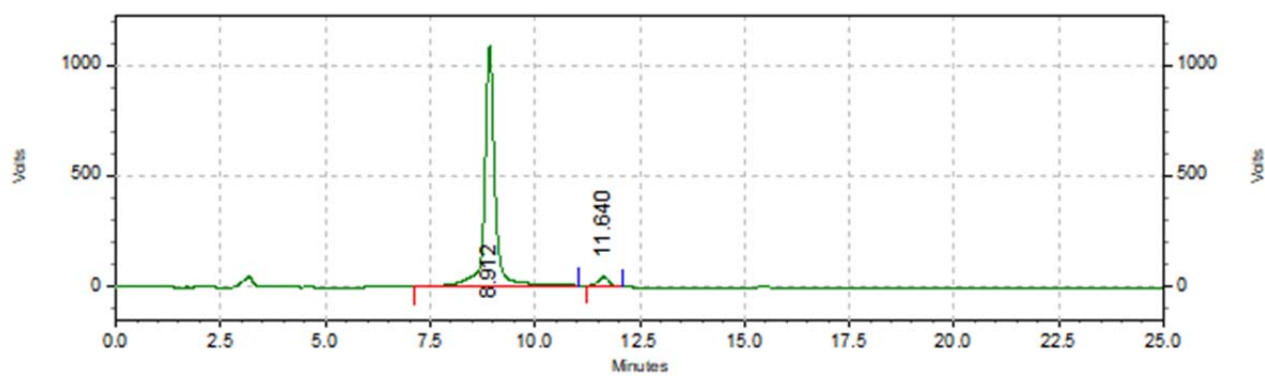

Results:

| Time   | Area     | Area%   | Height  | Height% |
|--------|----------|---------|---------|---------|
| 8.912  | 18888454 | 96.174  | 1086958 | 96.353  |
| 11.640 | 751424   | 3.826   | 41146   | 3.647   |
| Totals | 19639878 | 100.000 | 1128104 | 100.000 |

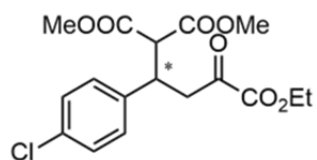

racemic sample:

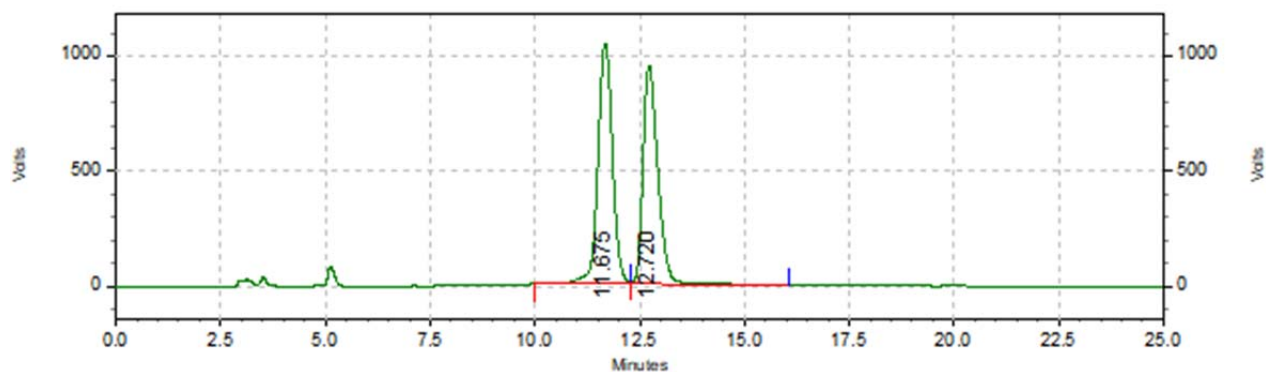

Results:

| Time   | Area     | Area%   | Height  | Height% |
|--------|----------|---------|---------|---------|
| 11.675 | 25366757 | 51.732  | 1045963 | 52.362  |
| 12.720 | 23668468 | 48.268  | 951615  | 47.638  |
| Totals | 49035225 | 100.000 | 1997578 | 100.000 |

asymmetric sample:

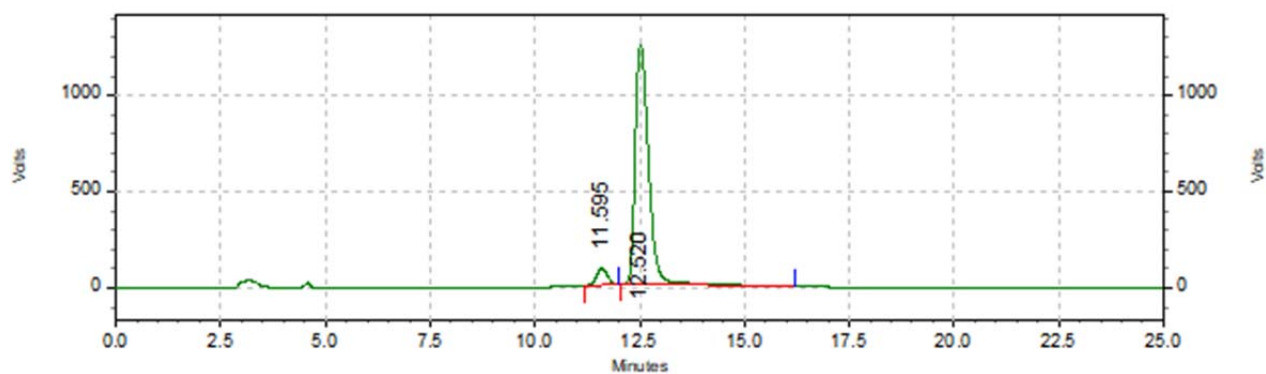

Results:

| Time   | Area     | Area%   | Height  | Height% |
|--------|----------|---------|---------|---------|
| 11.595 | 1544381  | 5.244   | 85258   | 6.407   |
| 12.520 | 27907473 | 94.756  | 1245531 | 93.593  |
| Totals | 29451854 | 100.000 | 1330789 | 100.000 |

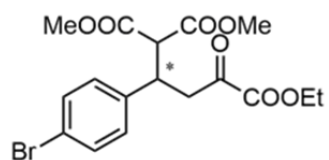

racemic sample:

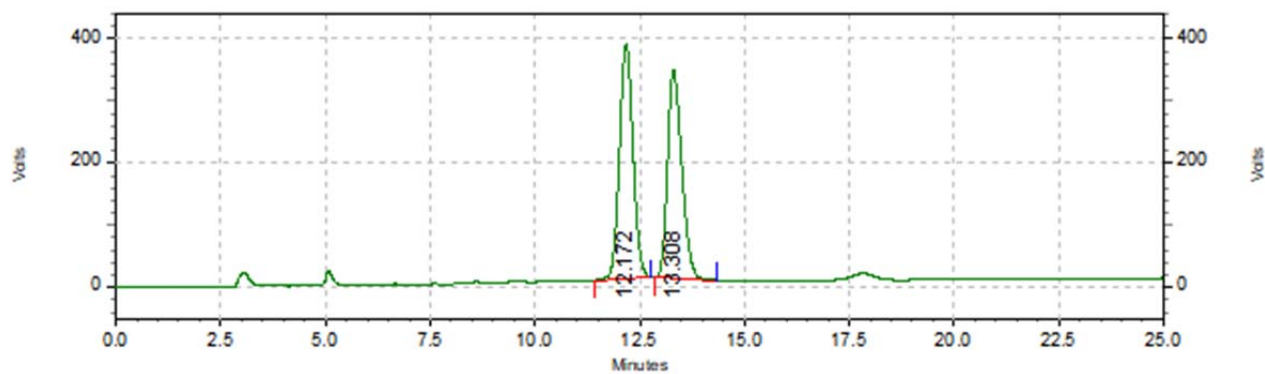

Results:

| Time   | Area     | Area%   | Height | Height% |
|--------|----------|---------|--------|---------|
| 12.172 | 8444736  | 51.549  | 377900 | 53.001  |
| 13.308 | 7937332  | 48.451  | 335111 | 46.999  |
| Totals | 16382068 | 100.000 | 713011 | 100.000 |

asymmetric sample:

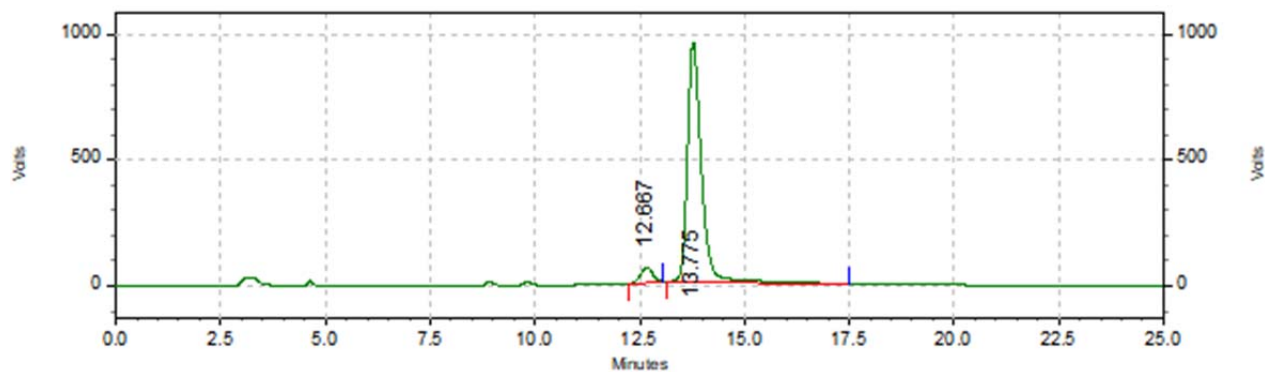

Results:

| Time   | Area     | Area%   | Height  | Height% |
|--------|----------|---------|---------|---------|
| 12.667 | 1161263  | 4.977   | 60822   | 6.018   |
| 13.775 | 22169401 | 95.023  | 949925  | 93.982  |
| Totals | 23330664 | 100.000 | 1010747 | 100.000 |

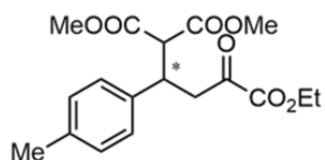

racemic sample:

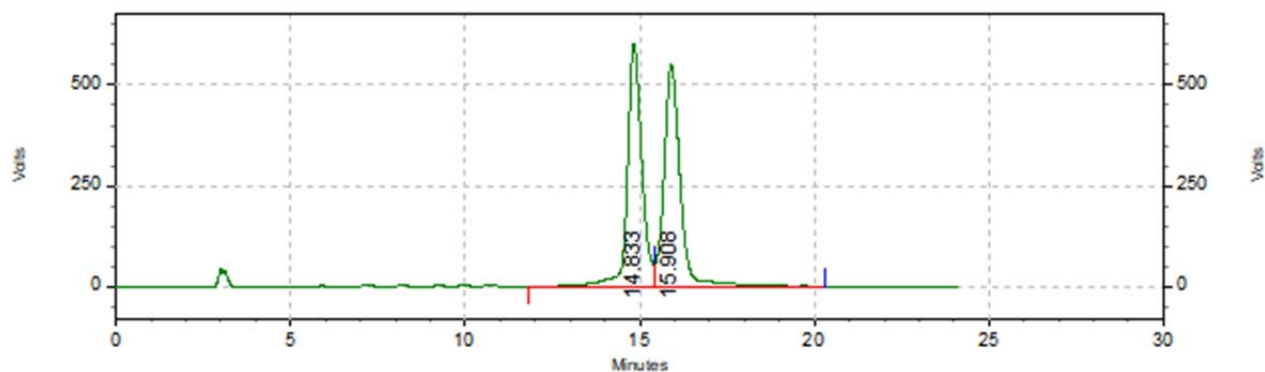

Results:

| Time   | Area     | Area%   | Height  | Height% |
|--------|----------|---------|---------|---------|
| 14.833 | 17040630 | 49.210  | 599424  | 52.255  |
| 15.908 | 17587777 | 50.790  | 547687  | 47.745  |
| Totals | 34628407 | 100.000 | 1147111 | 100.000 |

asymmetric sample:

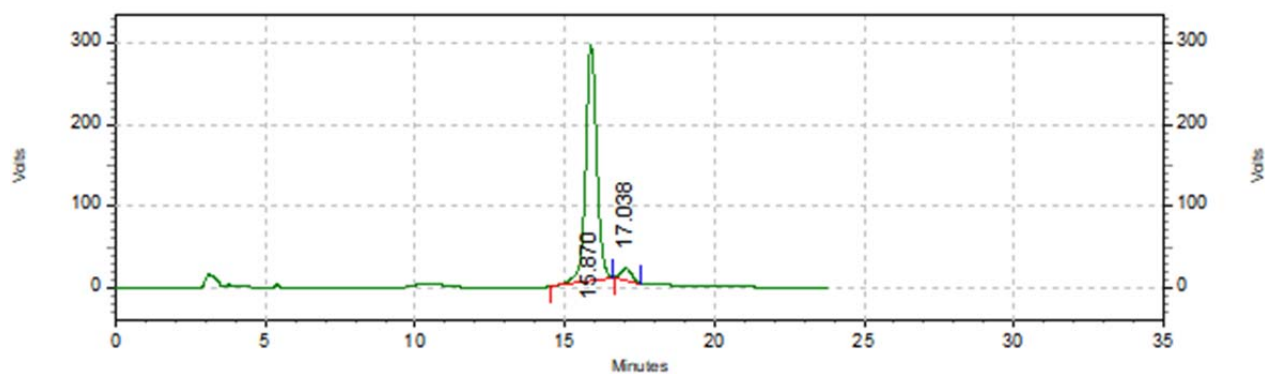

Results:

| Time   | Area    | Area%   | Height | Height% |
|--------|---------|---------|--------|---------|
| 15.870 | 7407112 | 95.556  | 289459 | 95.375  |
| 17.038 | 344482  | 4.444   | 14038  | 4.625   |
| Totals | 7751594 | 100.000 | 303497 | 100.000 |



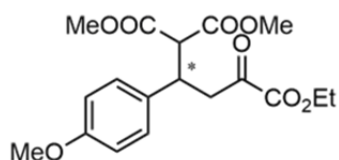

racemic sample:

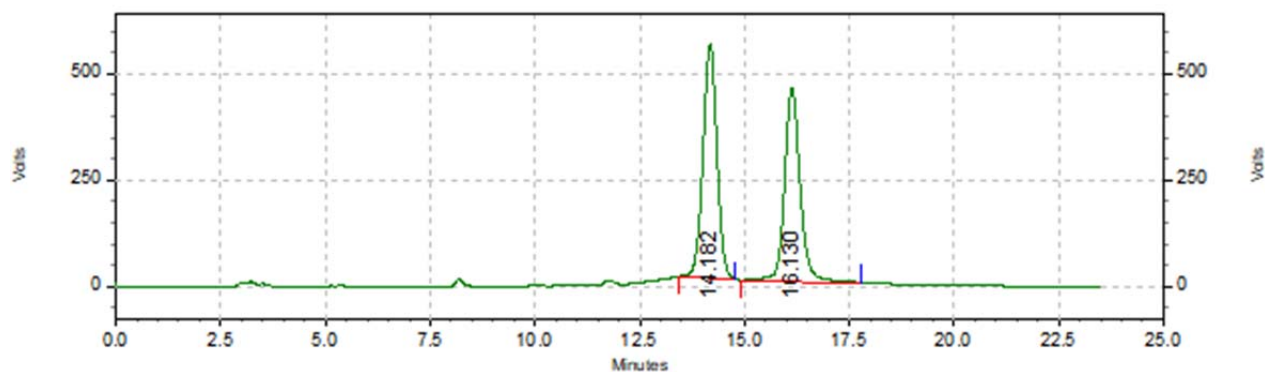

Results:

| Time   | Area     | Area%   | Height  | Height% |
|--------|----------|---------|---------|---------|
| 14.182 | 12800035 | 52.373  | 550829  | 54.830  |
| 16.130 | 11640064 | 47.627  | 453781  | 45.170  |
| Totals | 24440099 | 100.000 | 1004610 | 100.000 |

asymmetric sample:

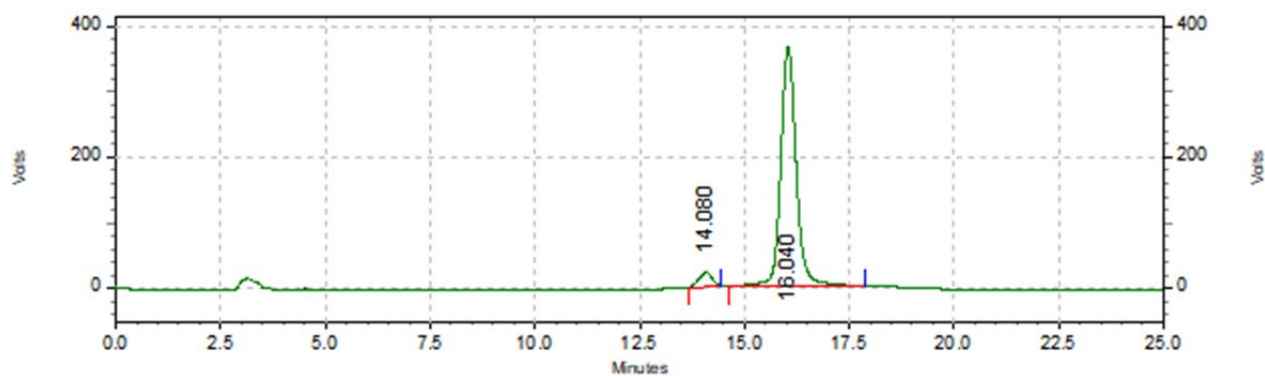

Results:

| Time   | Area    | Area%   | Height | Height% |
|--------|---------|---------|--------|---------|
| 14.080 | 484216  | 4.871   | 21942  | 5.663   |
| 16.040 | 9457193 | 95.129  | 365492 | 94.337  |
| Totals | 9941409 | 100.000 | 387434 | 100.000 |

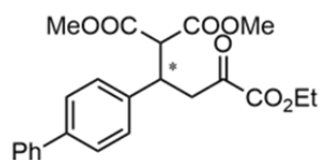

racemic sample:

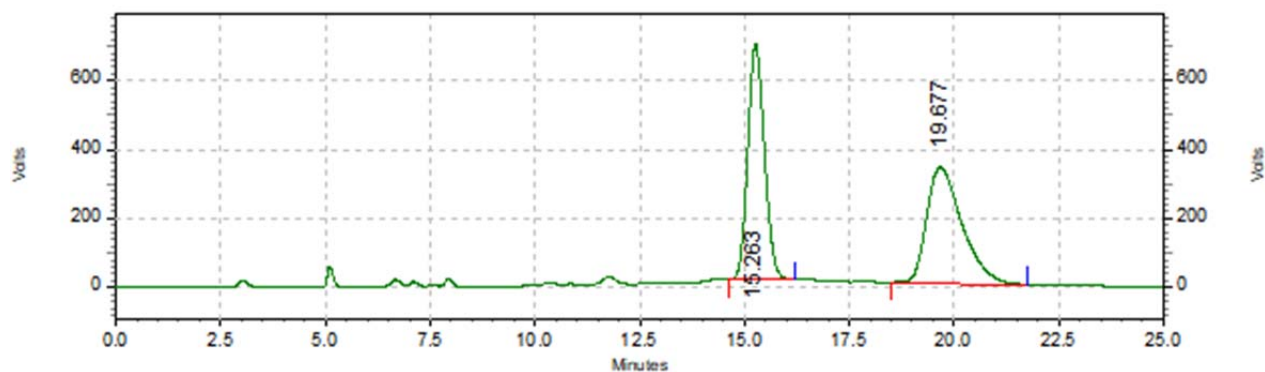

Results:

| Time   | Area     | Area%   | Height  | Height% |
|--------|----------|---------|---------|---------|
| 15.263 | 18880977 | 49.064  | 684555  | 67.026  |
| 19.677 | 19601275 | 50.936  | 336766  | 32.974  |
| Totals | 38482252 | 100.000 | 1021321 | 100.000 |

asymmetric sample:

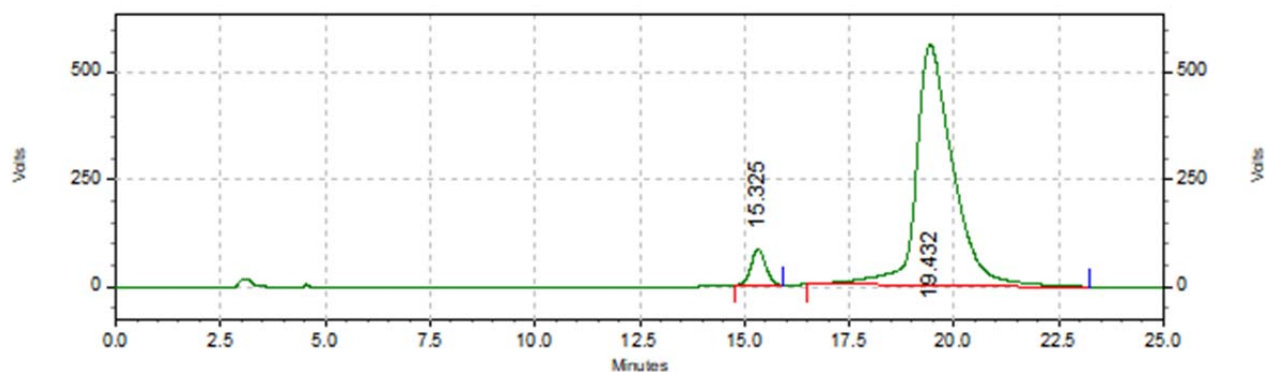

Results:

| Time   | Area     | Area%   | Height | Height% |
|--------|----------|---------|--------|---------|
| 15.325 | 2033784  | 5.598   | 84255  | 13.008  |
| 19.432 | 34294483 | 94.402  | 563468 | 86.992  |
| Totals | 36328267 | 100.000 | 647723 | 100.000 |

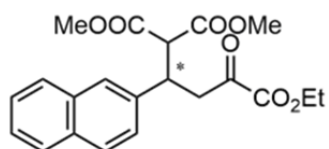

racemic sample:

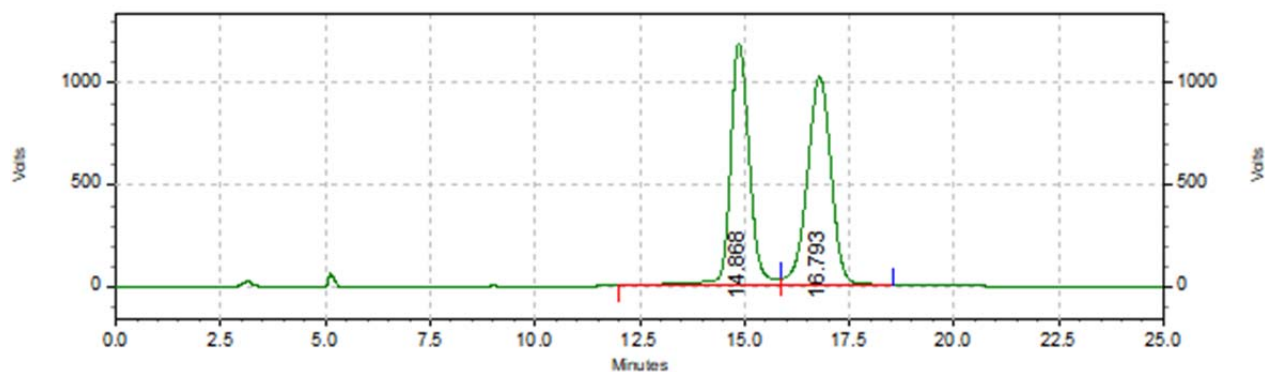

Results:

| Time   | Area     | Area%   | Height  | Height% |
|--------|----------|---------|---------|---------|
| 14.868 | 36902993 | 47.841  | 1179318 | 53.720  |
| 16.793 | 40234329 | 52.159  | 1015990 | 46.280  |
| Totals | 77137322 | 100.000 | 2195308 | 100.000 |

asymmetric sample:

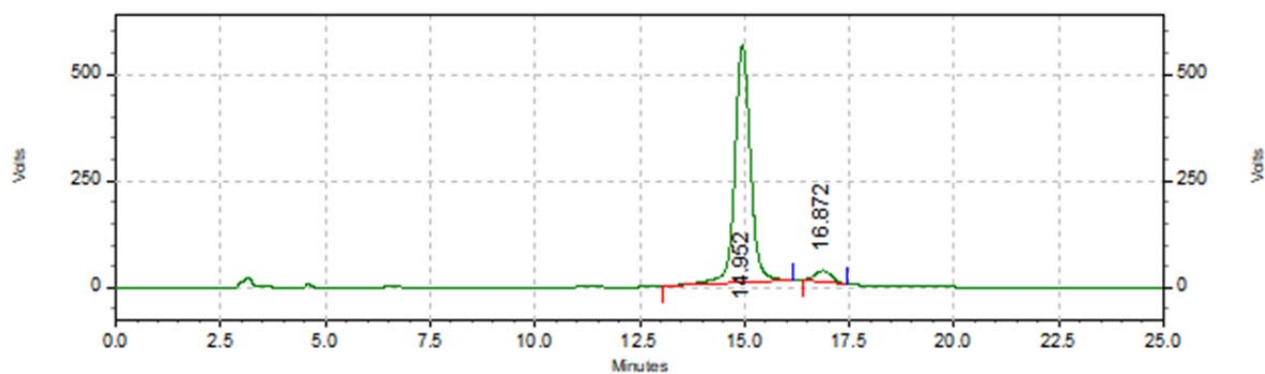

Results:

| Time   | Area     | Area%   | Height | Height% |
|--------|----------|---------|--------|---------|
| 14.952 | 14405237 | 95.044  | 558242 | 95.518  |
| 16.872 | 751194   | 4.956   | 26196  | 4.482   |
| Totals | 15156431 | 100.000 | 584438 | 100.000 |

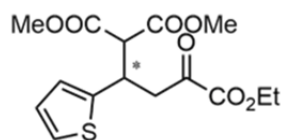

racemic sample:

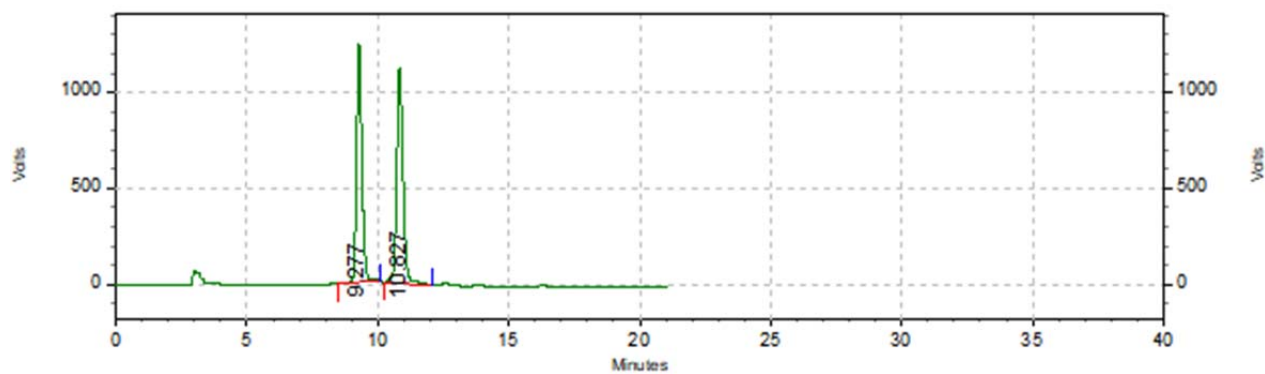

Results:

| Time   | Area     | Area%   | Height  | Height% |
|--------|----------|---------|---------|---------|
| 9.277  | 18132299 | 48.908  | 1245217 | 52.568  |
| 10.827 | 18941946 | 51.092  | 1123540 | 47.432  |
| Totals | 37074245 | 100.000 | 2368757 | 100.000 |

asymmetric sample:

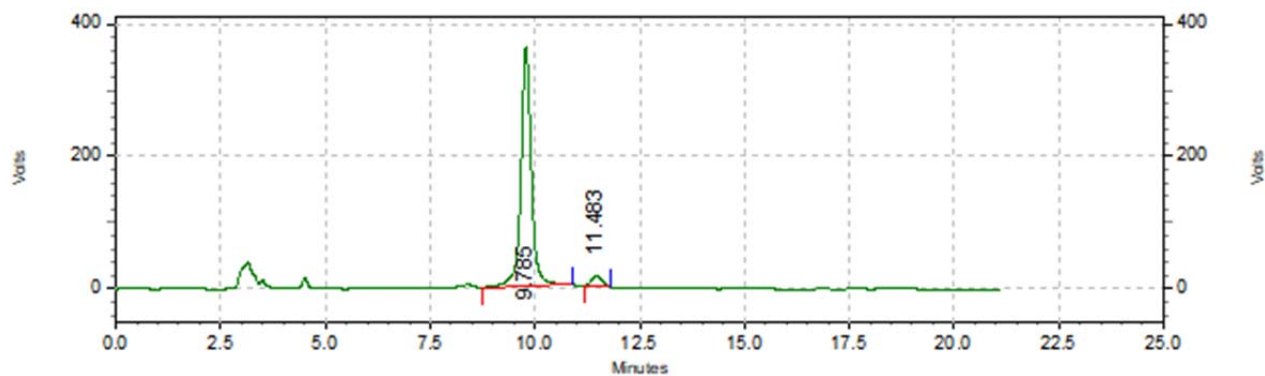

Results:

| Time   | Area    | Area%   | Height | Height% |
|--------|---------|---------|--------|---------|
| 9.785  | 6265096 | 96.045  | 361764 | 95.933  |
| 11.483 | 258000  | 3.955   | 15336  | 4.067   |
| Totals | 6523096 | 100.000 | 377100 | 100.000 |

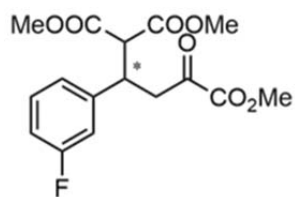

racemic sample:

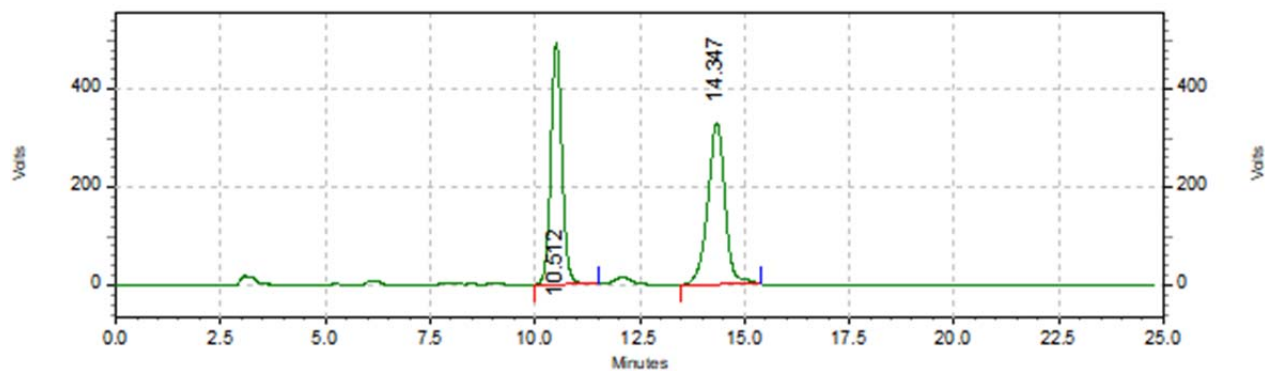

Results:

| Time   | Area     | Area%   | Height | Height% |
|--------|----------|---------|--------|---------|
| 10.512 | 9041120  | 48.980  | 492451 | 59.918  |
| 14.347 | 9417609  | 51.020  | 329425 | 40.082  |
| Totals | 18458729 | 100.000 | 821876 | 100.000 |

asymmetric sample:

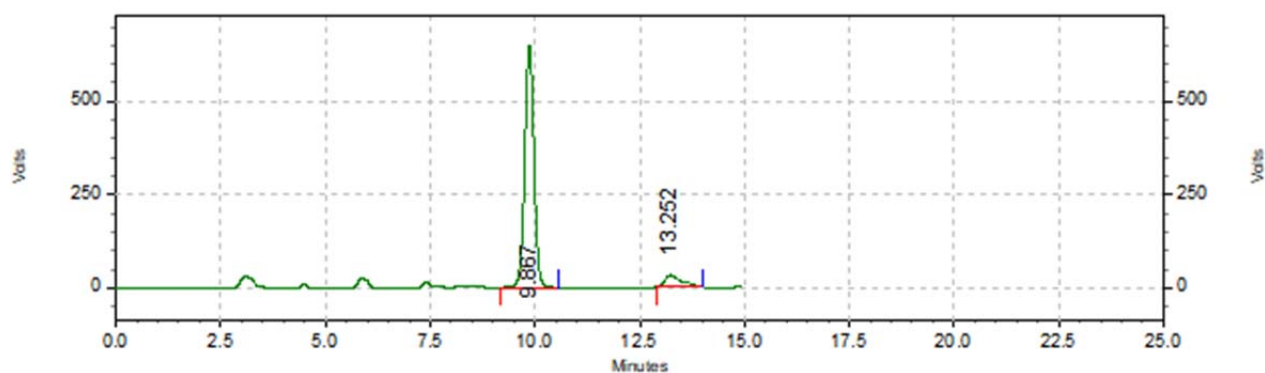

Results:

| Time   | Area     | Area%   | Height | Height% |
|--------|----------|---------|--------|---------|
| 9.867  | 9885948  | 91.659  | 647276 | 95.396  |
| 13.252 | 899595   | 8.341   | 31242  | 4.604   |
| Totals | 10785543 | 100.000 | 678518 | 100.000 |

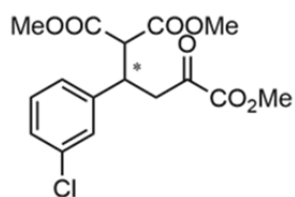

racemic sample:

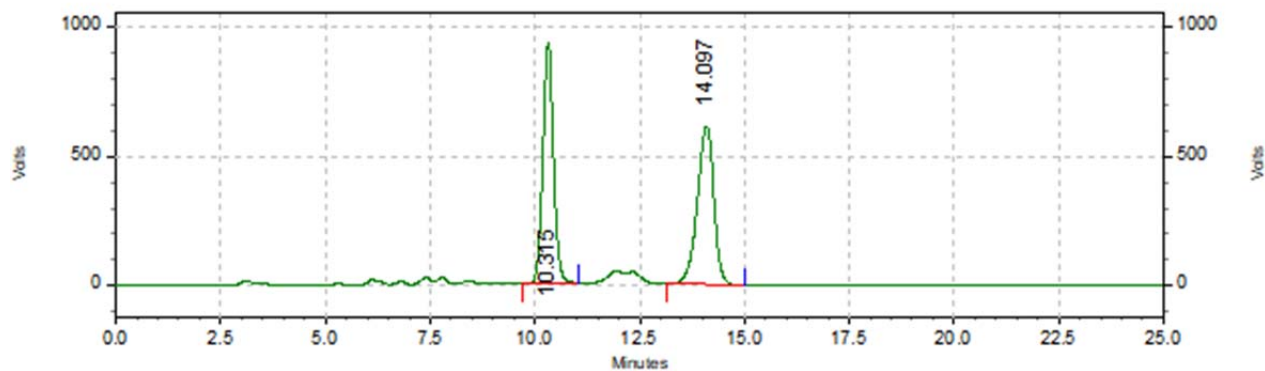

Results:

| Time   | Area     | Area%   | Height  | Height% |
|--------|----------|---------|---------|---------|
| 10.315 | 16548124 | 49.495  | 932061  | 60.272  |
| 14.097 | 16885511 | 50.505  | 614361  | 39.728  |
| Totals | 33433635 | 100.000 | 1546422 | 100.000 |

asymmetric sample:

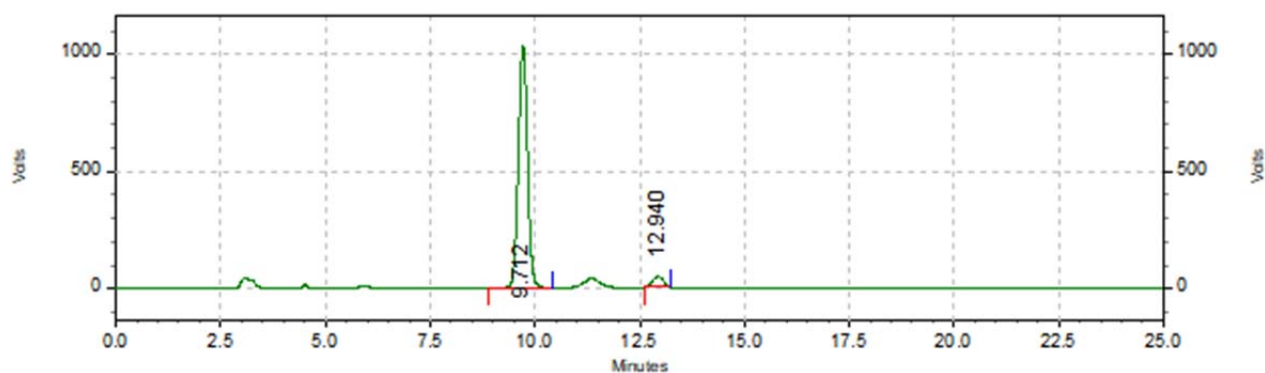

Results:

| Time   | Area     | Area%   | Height  | Height% |
|--------|----------|---------|---------|---------|
| 9.712  | 15538267 | 95.041  | 1034189 | 95.899  |
| 12.940 | 810764   | 4.959   | 44223   | 4.101   |
| Totals | 16349031 | 100.000 | 1078412 | 100.000 |

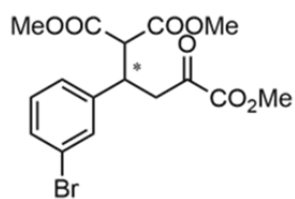

racemic sample:

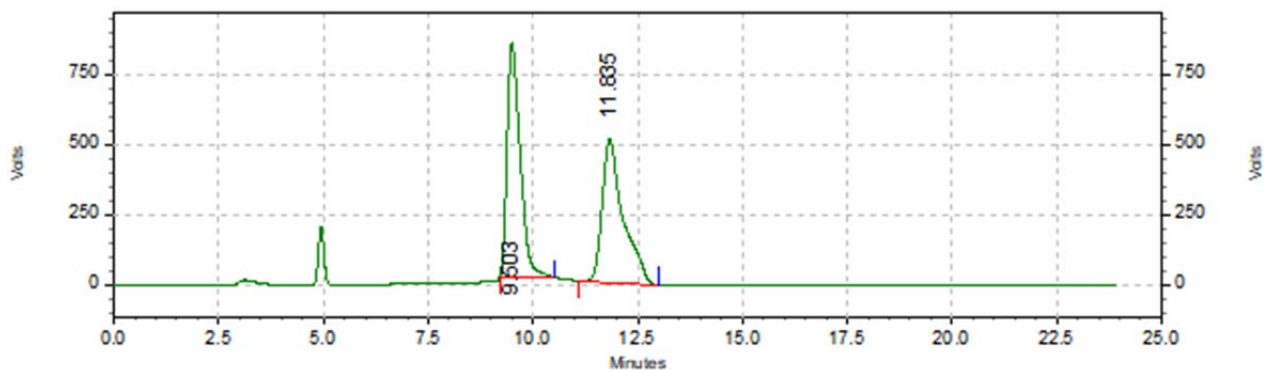

Results:

| Time   | Area     | Area%   | Height  | Height% |
|--------|----------|---------|---------|---------|
| 9.503  | 18127258 | 50.707  | 835255  | 62.052  |
| 11.835 | 17621795 | 49.293  | 510794  | 37.948  |
| Totals | 35749053 | 100.000 | 1346049 | 100.000 |

asymmetric sample:

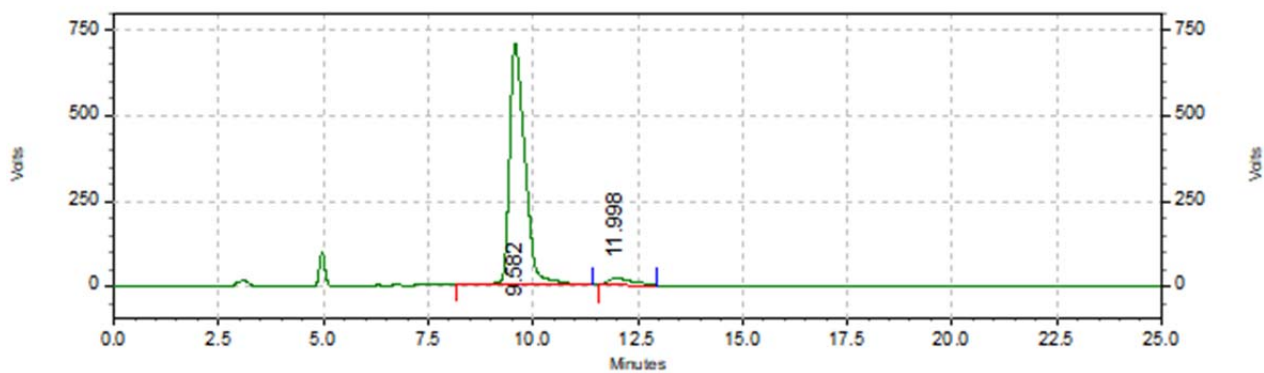

Results:

| Time   | Area     | Area%   | Height | Height% |
|--------|----------|---------|--------|---------|
| 9.582  | 17986554 | 95.611  | 706215 | 97.330  |
| 11.998 | 825660   | 4.389   | 19376  | 2.670   |
| Totals | 18812214 | 100.000 | 725591 | 100.000 |

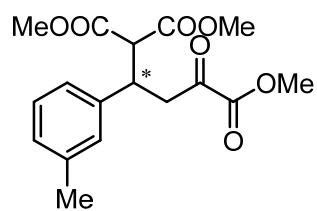

racemic sample:

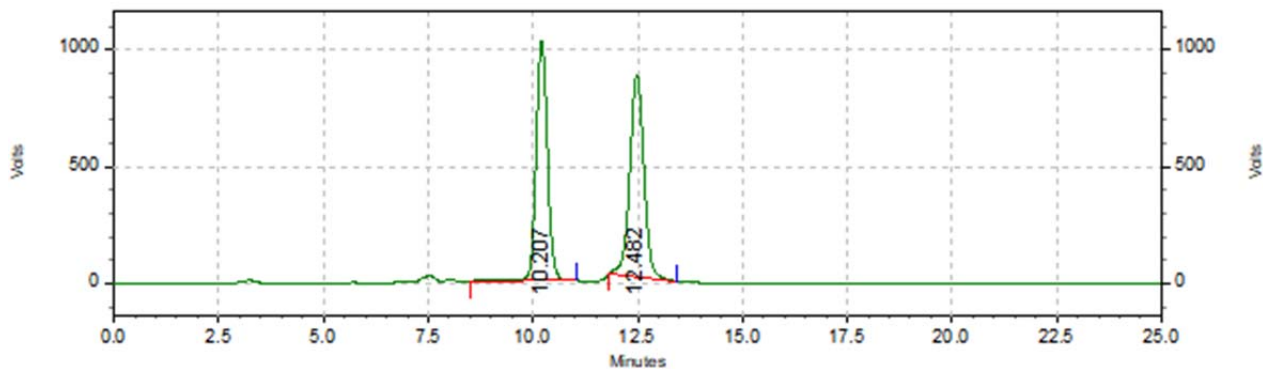

Results:

| Time   | Area     | Area%   | Height  | Height% |
|--------|----------|---------|---------|---------|
| 10.207 | 19427856 | 49.161  | 1025504 | 54.386  |
| 12.482 | 20090936 | 50.839  | 860100  | 45.614  |
| Totals | 39518792 | 100.000 | 1885604 | 100.000 |

asymmetric sample:

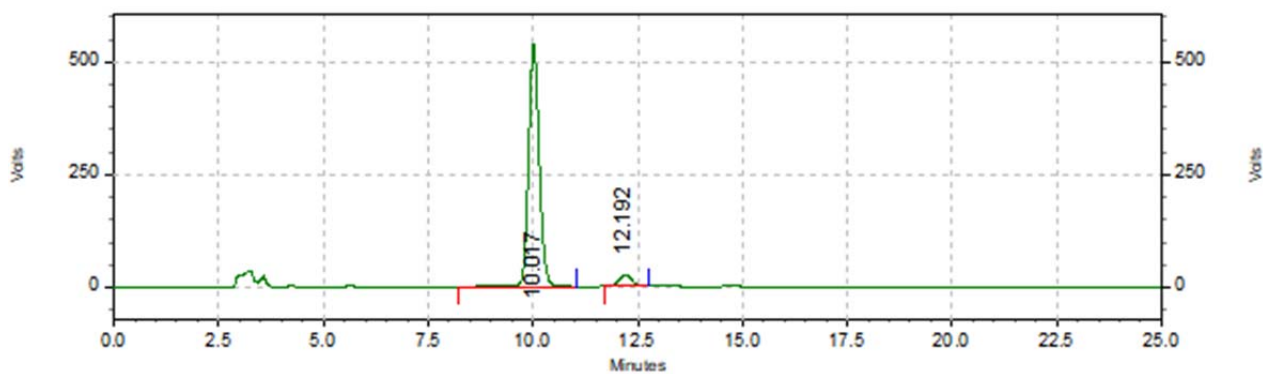

Results:

| Time   | Area    | Area%   | Height | Height% |
|--------|---------|---------|--------|---------|
| 10.017 | 9484257 | 95.165  | 536996 | 95.746  |
| 12.192 | 481851  | 4.835   | 23860  | 4.254   |
| Totals | 9966108 | 100.000 | 560856 | 100.000 |



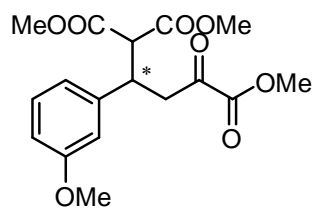

racemic sample:

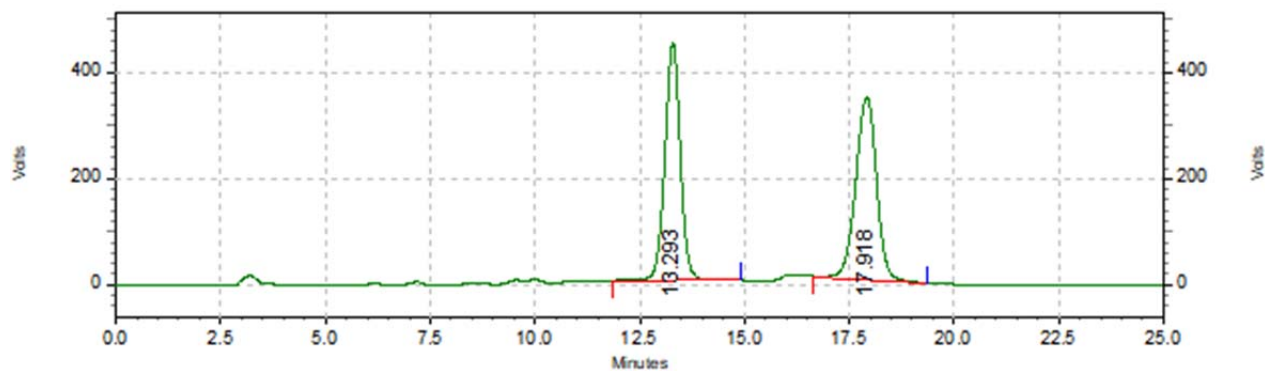

Results:

| Time   | Area     | Area%   | Height | Height% |
|--------|----------|---------|--------|---------|
| 13.293 | 11495684 | 49.230  | 448139 | 56.631  |
| 17.918 | 11855466 | 50.770  | 343197 | 43.369  |
| Totals | 23351150 | 100.000 | 791336 | 100.000 |

asymmetric sample:

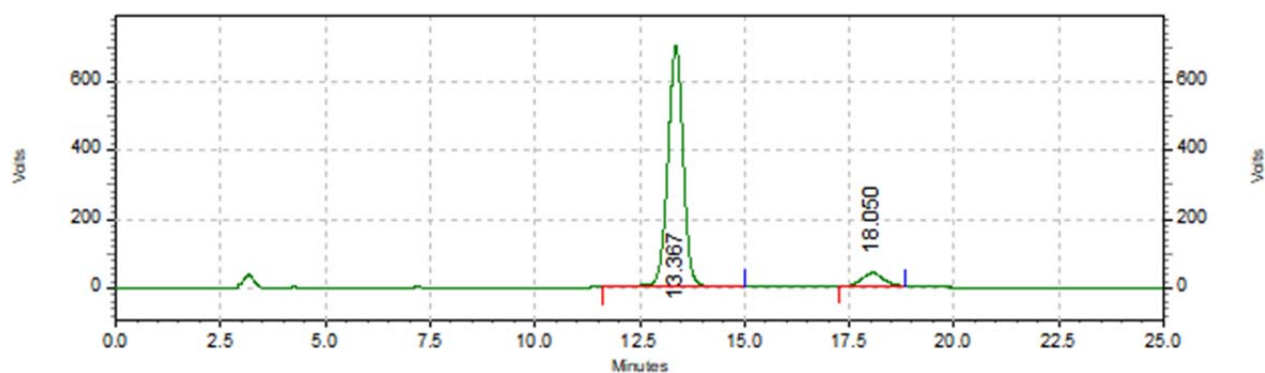

Results:

| Time   | Area     | Area%   | Height | Height% |
|--------|----------|---------|--------|---------|
| 13.367 | 17880424 | 92.939  | 699643 | 94.773  |
| 18.050 | 1358511  | 7.061   | 38591  | 5.227   |
| Totals | 19238935 | 100.000 | 738234 | 100.000 |

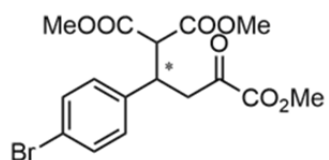

racemic sample:

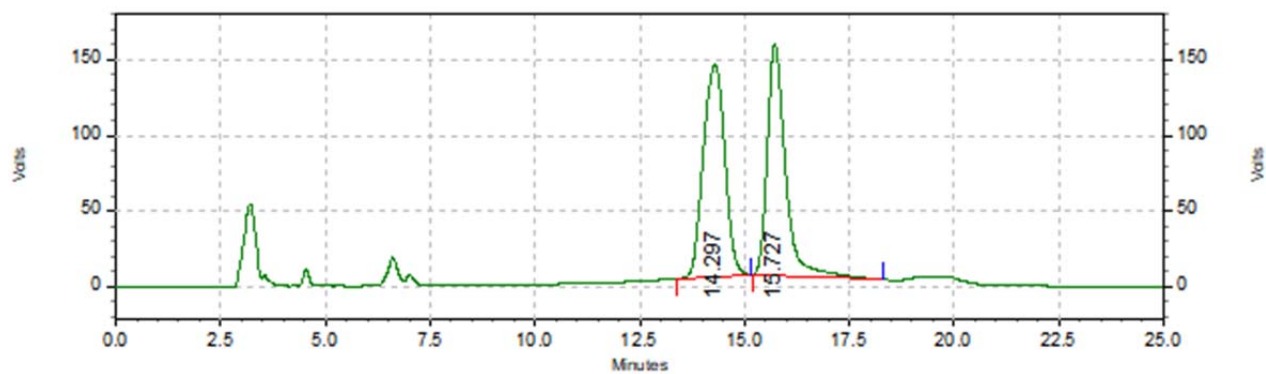

Results:

| Time   | Area    | Area%   | Height | Height% |
|--------|---------|---------|--------|---------|
| 14.297 | 5000768 | 51.901  | 140274 | 47.771  |
| 15.727 | 4634425 | 48.099  | 153364 | 52.229  |
| Totals | 9635193 | 100.000 | 293638 | 100.000 |

asymmetric sample:

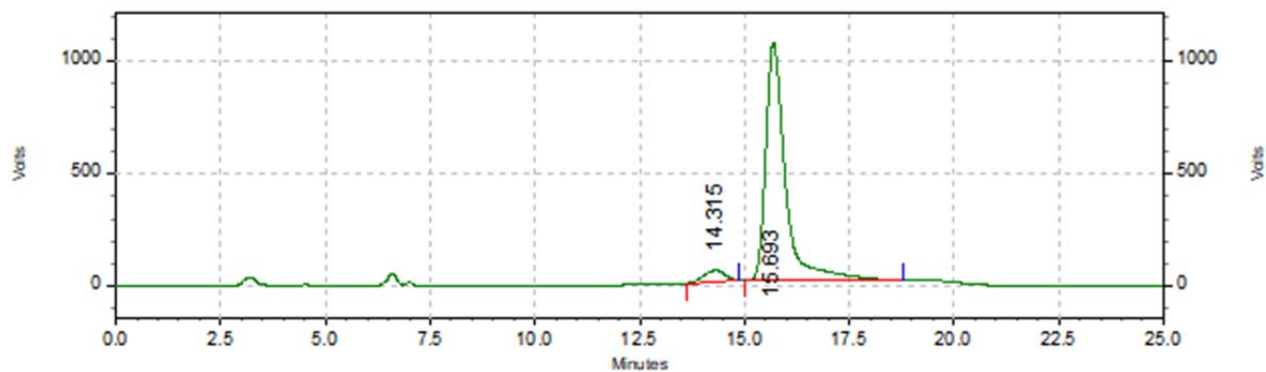

Results:

| Time   | Area     | Area%   | Height  | Height% |
|--------|----------|---------|---------|---------|
| 14.315 | 1657281  | 4.576   | 48661   | 4.409   |
| 15.693 | 34559385 | 95.424  | 1054913 | 95.591  |
| Totals | 36216666 | 100.000 | 1103574 | 100.000 |

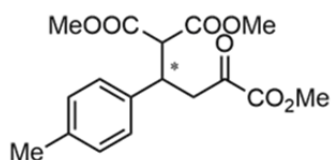

racemic sample:

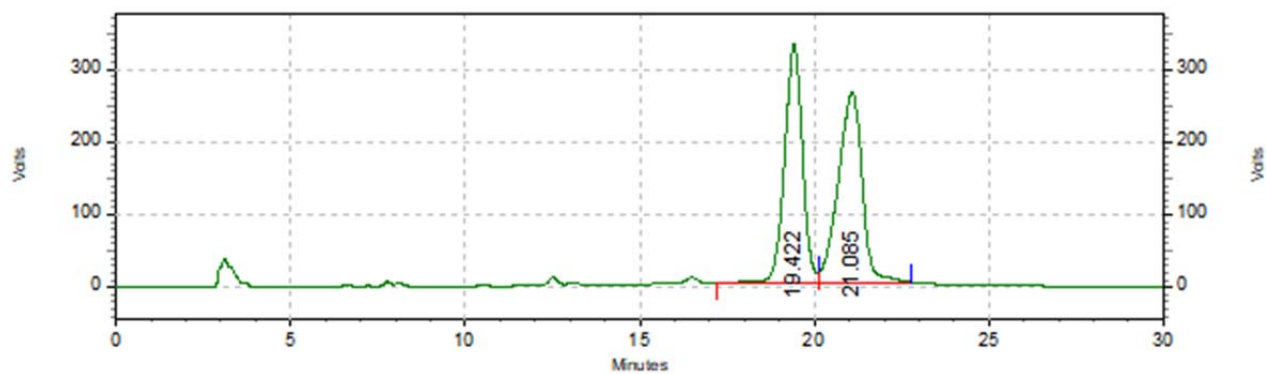

Results:

| Time   | Area     | Area%   | Height | Height% |
|--------|----------|---------|--------|---------|
| 19.422 | 11637076 | 48.429  | 328745 | 55.706  |
| 21.085 | 12392189 | 51.571  | 261401 | 44.294  |
| Totals | 24029265 | 100.000 | 590146 | 100.000 |

asymmetric sample:

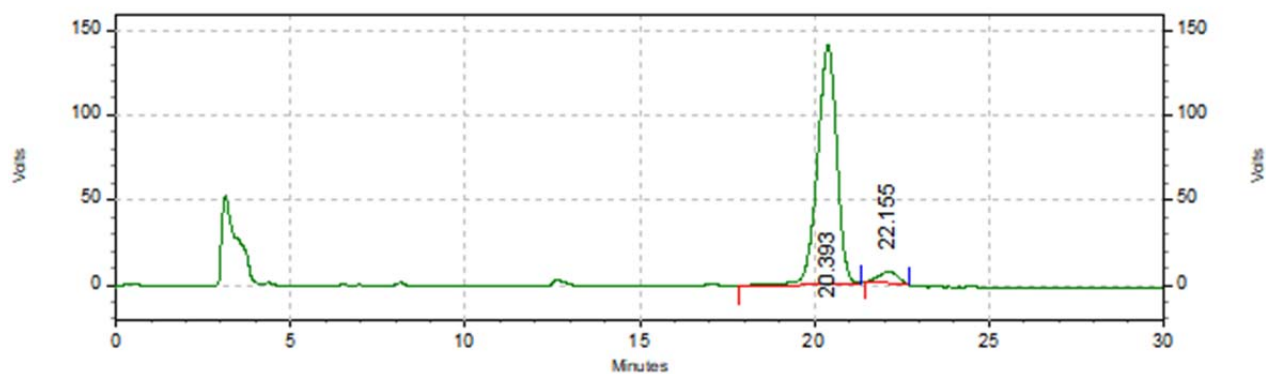

Results:

| Time   | Area    | Area%   | Height | Height% |
|--------|---------|---------|--------|---------|
| 20.393 | 5424702 | 95.052  | 140868 | 95.180  |
| 22.155 | 282395  | 4.948   | 7134   | 4.820   |
| Totals | 5707097 | 100.000 | 148002 | 100.000 |

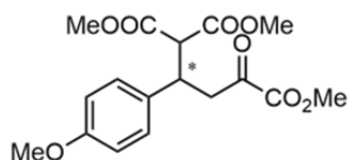

racemic sample:

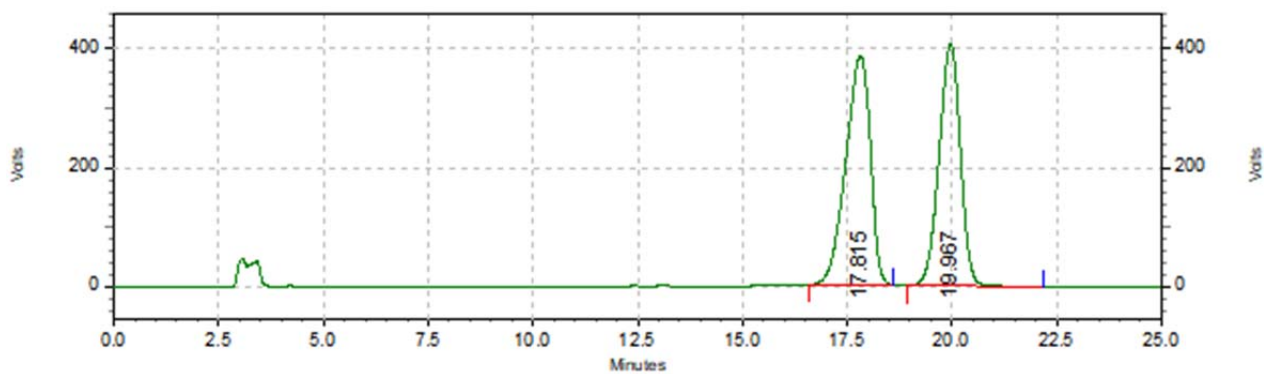

Results:

| Time   | Area     | Area%   | Height | Height% |
|--------|----------|---------|--------|---------|
| 17.815 | 15689155 | 52.254  | 384469 | 48.603  |
| 19.967 | 14335623 | 47.746  | 406565 | 51.397  |
| Totals | 30024778 | 100.000 | 791034 | 100.000 |

asymmetric sample:

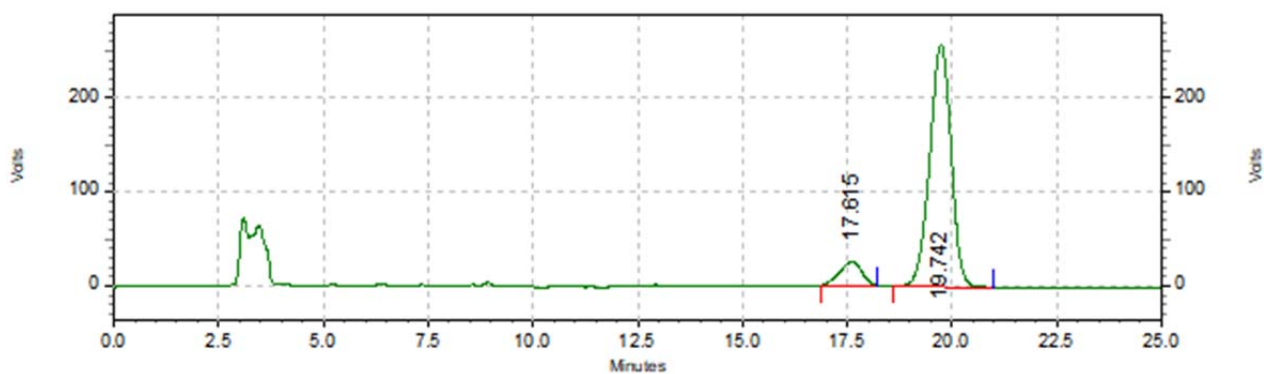

Results:

| Time   | Area    | Area%   | Height | Height% |
|--------|---------|---------|--------|---------|
| 17.615 | 924145  | 9.261   | 25373  | 8.980   |
| 19.742 | 9055278 | 90.739  | 257163 | 91.020  |
| Totals | 9979423 | 100.000 | 282536 | 100.000 |

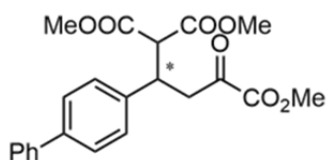

racemic sample:

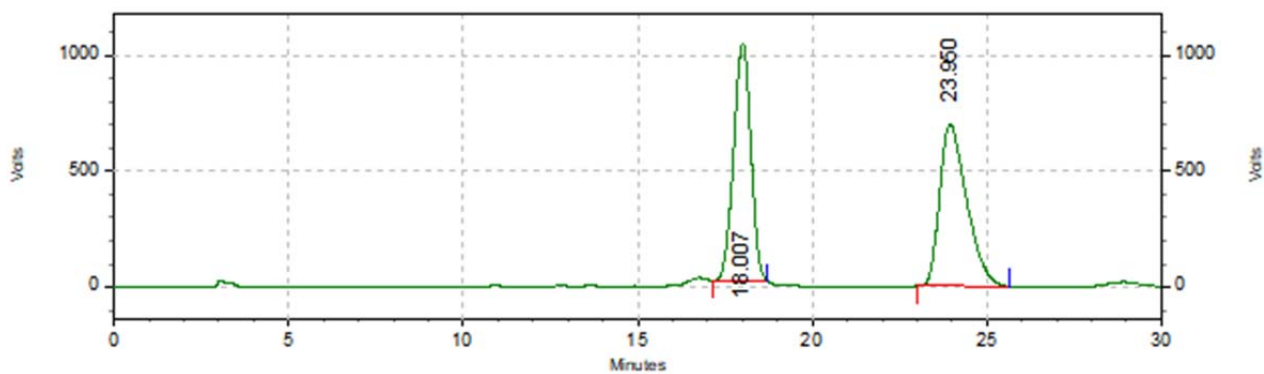

Results:

| Time   | Area     | Area%   | Height  | Height% |
|--------|----------|---------|---------|---------|
| 18.007 | 35066083 | 48.337  | 1023655 | 59.409  |
| 23.950 | 37478830 | 51.663  | 699419  | 40.591  |
| Totals | 72544913 | 100.000 | 1723074 | 100.000 |

asymmetric sample:

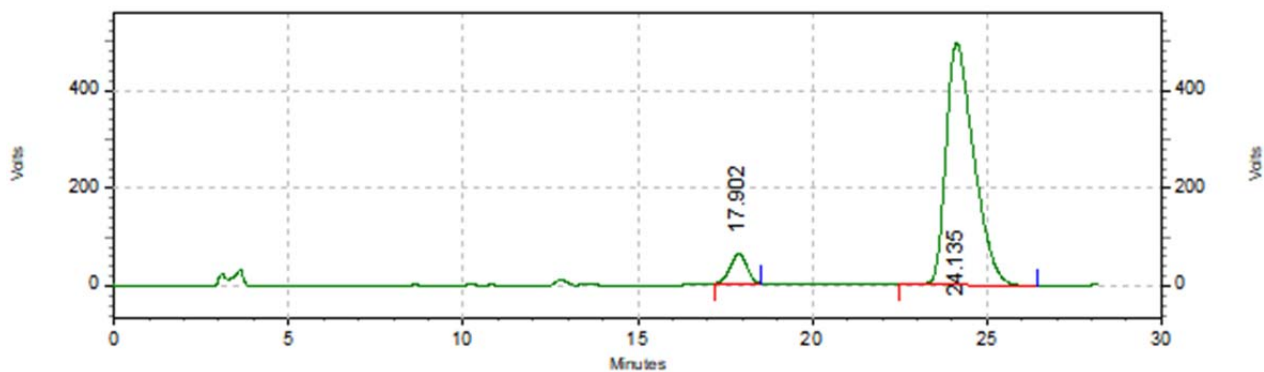

Results:

| Time   | Area     | Area%   | Height | Height% |
|--------|----------|---------|--------|---------|
| 17.902 | 2028301  | 6.928   | 61708  | 11.102  |
| 24.135 | 27248086 | 93.072  | 494123 | 88.898  |
| Totals | 29276387 | 100.000 | 555831 | 100.000 |

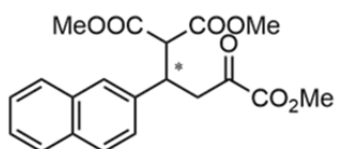

racemic sample:

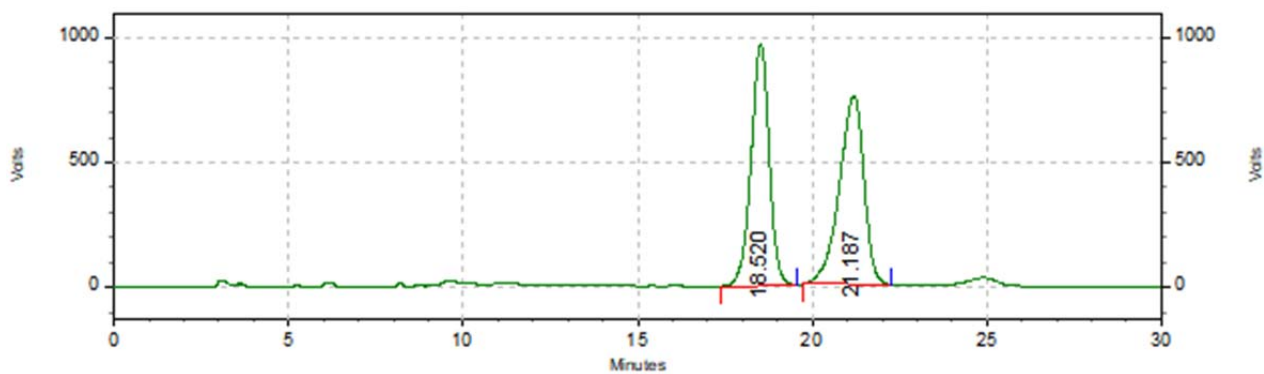

Results:

| Time   | Area     | Area%   | Height  | Height% |
|--------|----------|---------|---------|---------|
| 18.520 | 34738241 | 48.443  | 967785  | 56.228  |
| 21.187 | 36971675 | 51.557  | 753395  | 43.772  |
| Totals | 71709916 | 100.000 | 1721180 | 100.000 |

asymmetric sample:

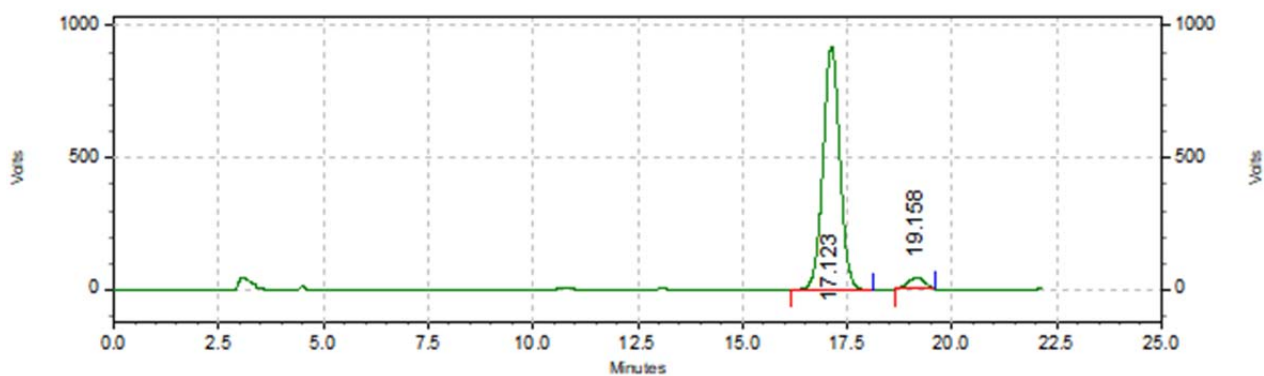

Results:

| Time   | Area     | Area%   | Height | Height% |
|--------|----------|---------|--------|---------|
| 17.123 | 25594536 | 95.579  | 918618 | 95.543  |
| 19.158 | 1183958  | 4.421   | 42855  | 4.457   |
| Totals | 26778494 | 100.000 | 961473 | 100.000 |

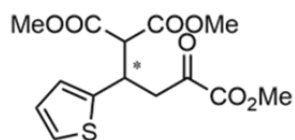

racemic sample:

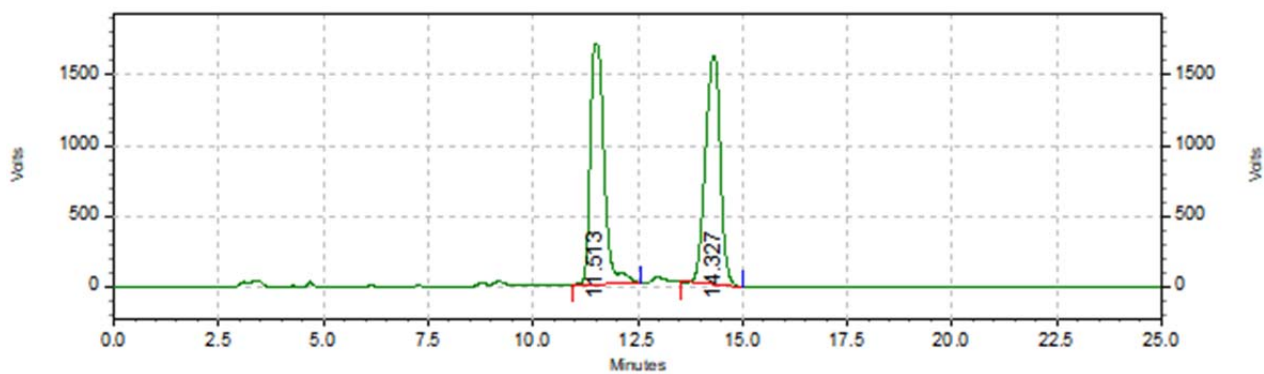

Results:

| Time   | Area     | Area%   | Height  | Height% |
|--------|----------|---------|---------|---------|
| 11.513 | 38905375 | 49.274  | 1693287 | 51.190  |
| 14.327 | 40051947 | 50.726  | 1614544 | 48.810  |
| Totals | 78957322 | 100.000 | 3307831 | 100.000 |

asymmetric sample:

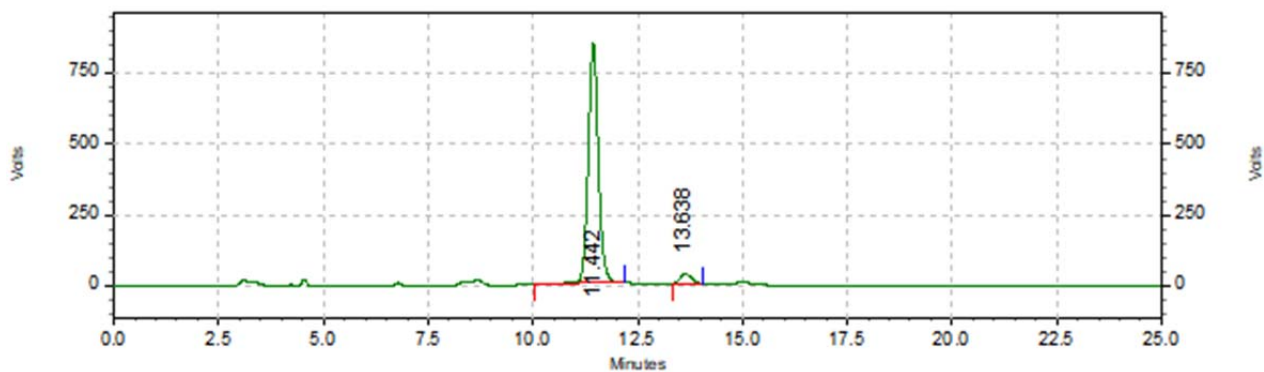

Results:

| Time   | Area     | Area%   | Height | Height% |
|--------|----------|---------|--------|---------|
| 11.442 | 14422695 | 95.919  | 846410 | 96.189  |
| 13.638 | 613627   | 4.081   | 33539  | 3.811   |
| Totals | 15036322 | 100.000 | 879949 | 100.000 |

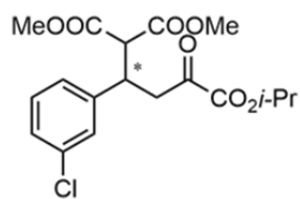

racemic sample:

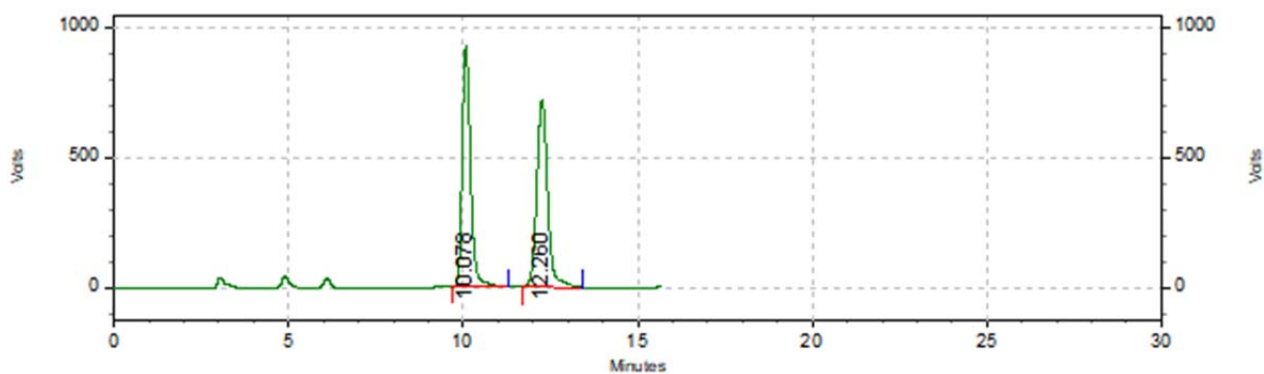

Results:

| Time   | Area     | Area%   | Height  | Height% |
|--------|----------|---------|---------|---------|
| 10.078 | 15287242 | 49.614  | 924956  | 56.272  |
| 12.260 | 15525319 | 50.386  | 718762  | 43.728  |
| Totals | 30812561 | 100.000 | 1643718 | 100.000 |

asymmetric sample:

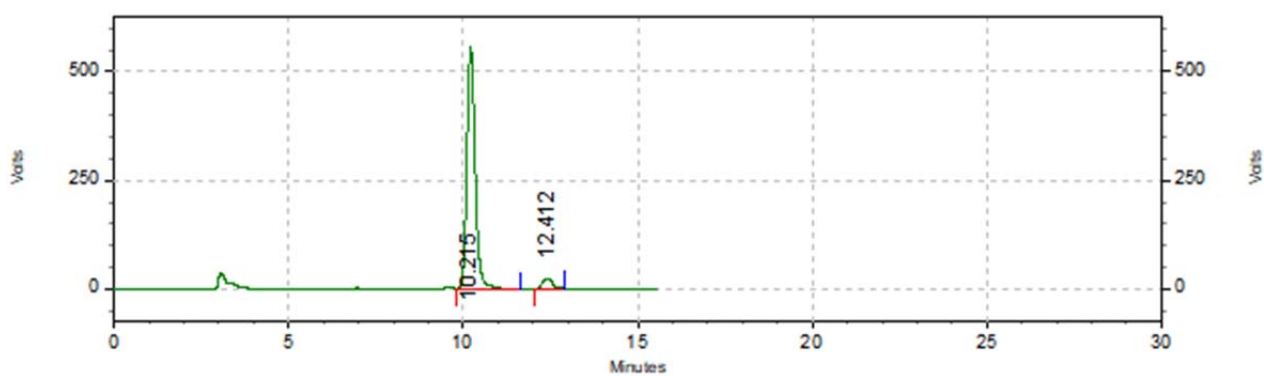

Results:

| Time   | Area    | Area%   | Height | Height% |
|--------|---------|---------|--------|---------|
| 10.215 | 9080860 | 95.080  | 556084 | 95.886  |
| 12.412 | 469857  | 4.920   | 23857  | 4.114   |
| Totals | 9550717 | 100.000 | 579941 | 100.000 |



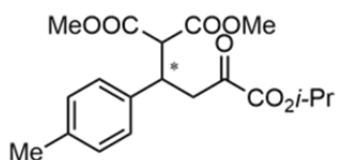

racemic sample:

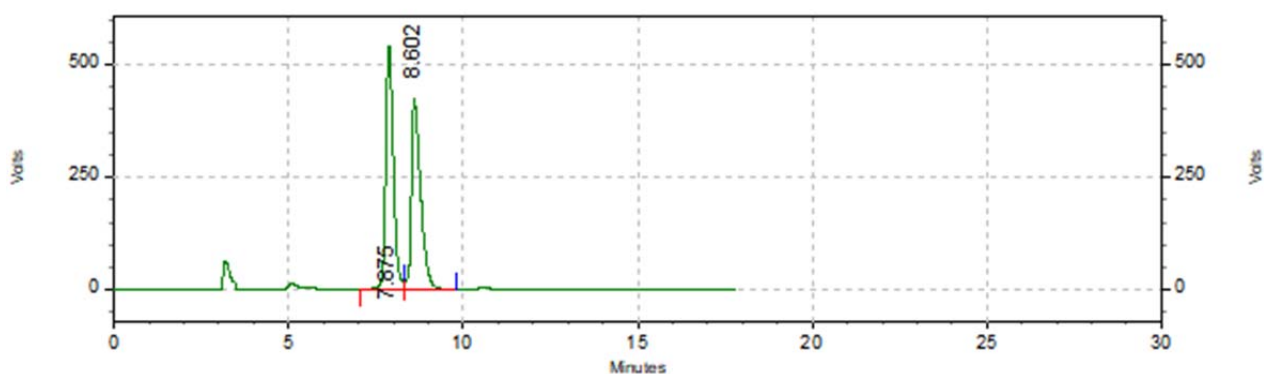

Results:

| Time   | Area     | Area%   | Height | Height% |
|--------|----------|---------|--------|---------|
| 7.875  | 8127496  | 50.989  | 539094 | 56.167  |
| 8.602  | 7812285  | 49.011  | 420704 | 43.833  |
| Totals | 15939781 | 100.000 | 959798 | 100.000 |

asymmetric sample:

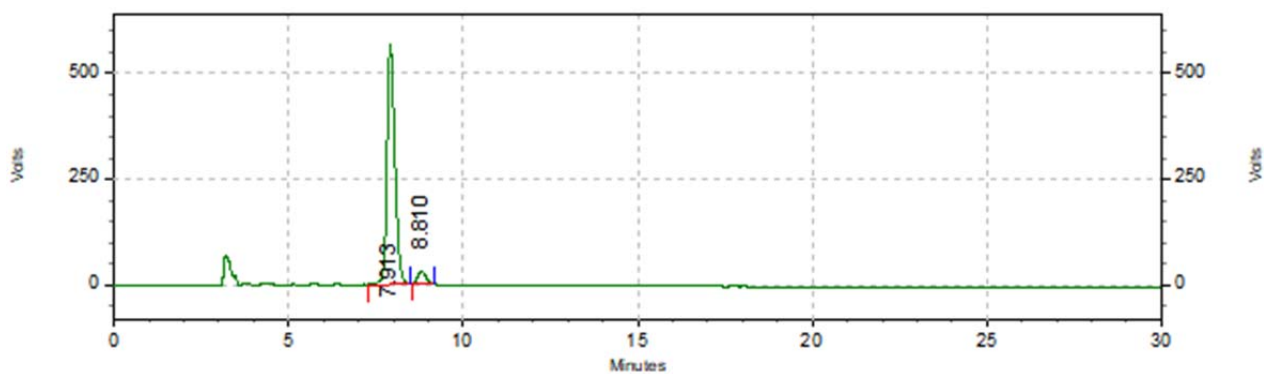

Results:

| Time   | Area    | Area%   | Height | Height% |
|--------|---------|---------|--------|---------|
| 7.913  | 8899405 | 94.944  | 565678 | 95.125  |
| 8.810  | 473919  | 5.056   | 28991  | 4.875   |
| Totals | 9373324 | 100.000 | 594669 | 100.000 |

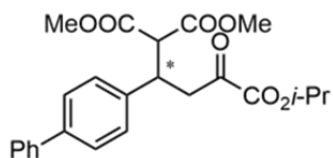

racemic sample:

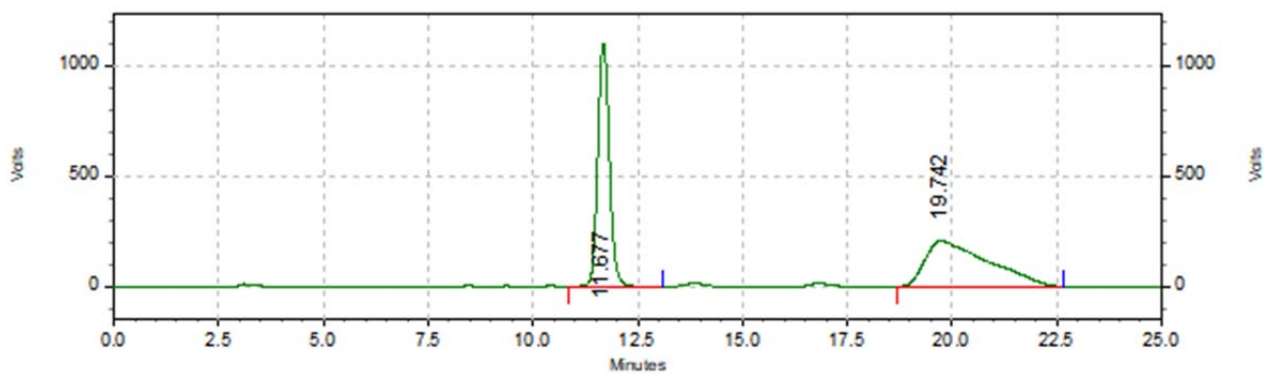

Results:

| Time   | Area     | Area%   | Height  | Height% |
|--------|----------|---------|---------|---------|
| 11.677 | 21274289 | 49.228  | 1100503 | 84.042  |
| 19.742 | 21941734 | 50.772  | 208967  | 15.958  |
| Totals | 43216023 | 100.000 | 1309470 | 100.000 |

asymmetric sample:

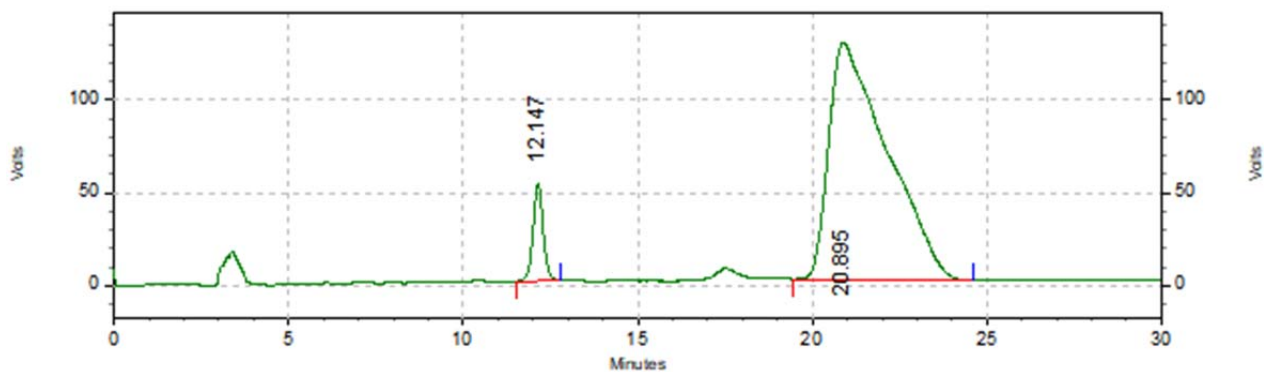

Results:

| Time   | Area     | Area%   | Height | Height% |
|--------|----------|---------|--------|---------|
| 12.147 | 1068888  | 6.747   | 52755  | 29.303  |
| 20.895 | 14772526 | 93.253  | 127277 | 70.697  |
| Totals | 15841414 | 100.000 | 180032 | 100.000 |

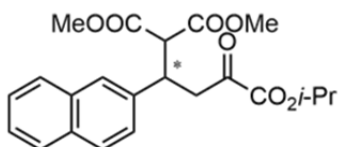

racemic sample:

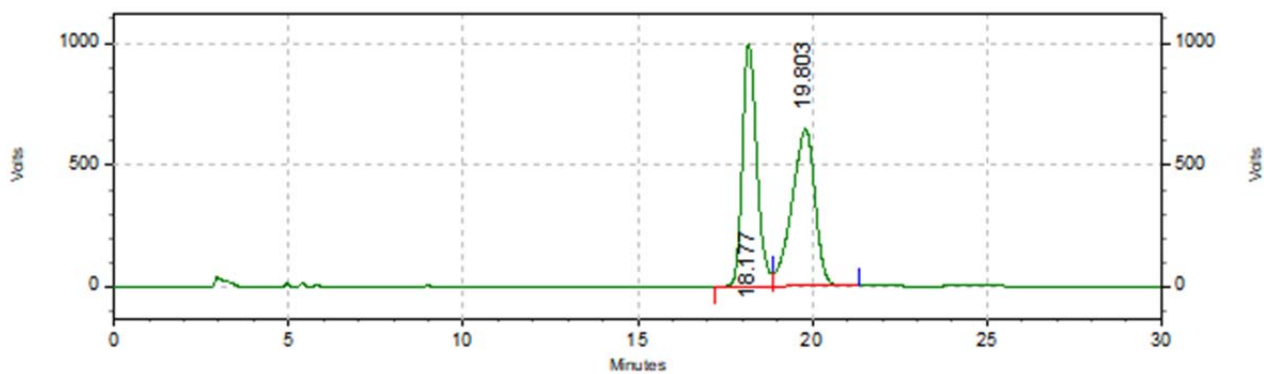

Results:

| Time   | Area     | Area%   | Height  | Height% |
|--------|----------|---------|---------|---------|
| 18.177 | 28287009 | 49.052  | 991087  | 60.755  |
| 19.803 | 29380797 | 50.948  | 640202  | 39.245  |
| Totals | 57667806 | 100.000 | 1631289 | 100.000 |

asymmetric sample:

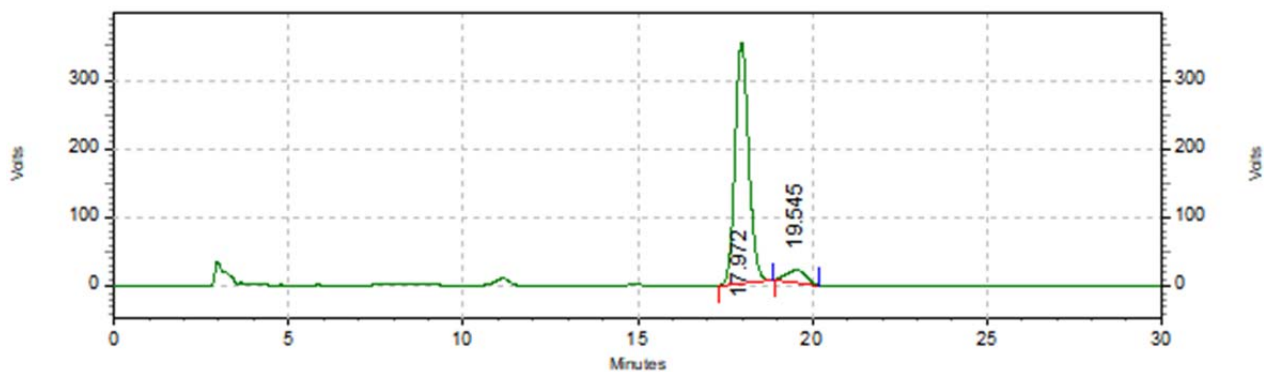

Results:

| Time   | Area     | Area%   | Height | Height% |
|--------|----------|---------|--------|---------|
| 17.972 | 9483962  | 93.683  | 350232 | 95.251  |
| 19.545 | 639456   | 6.317   | 17460  | 4.749   |
| Totals | 10123418 | 100.000 | 367692 | 100.000 |

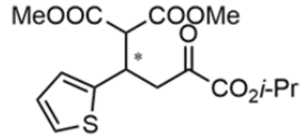

racemic sample:

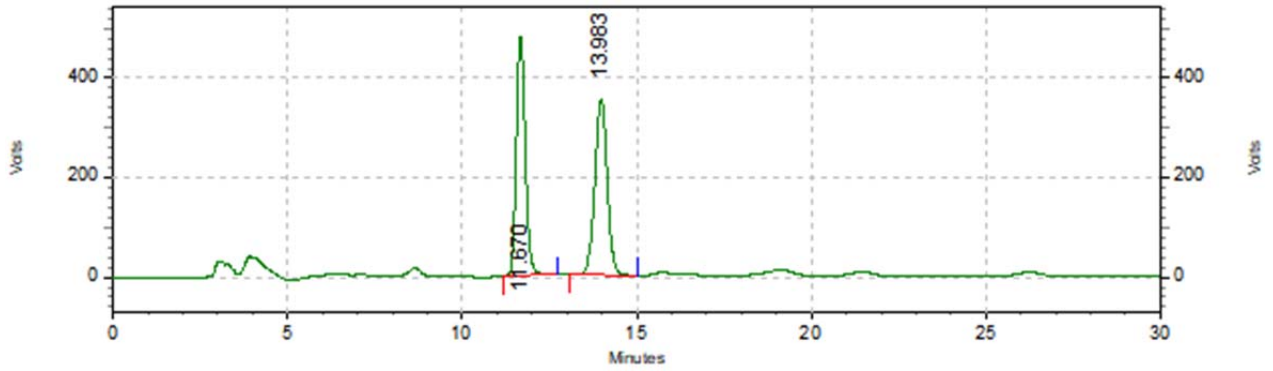

Results:

| Time   | Area     | Area%   | Height | Height% |
|--------|----------|---------|--------|---------|
| 11.670 | 8644920  | 49.997  | 481380 | 57.688  |
| 13.983 | 8646091  | 50.003  | 353070 | 42.312  |
| Totals | 17291011 | 100.000 | 834450 | 100.000 |

asymmetric sample:

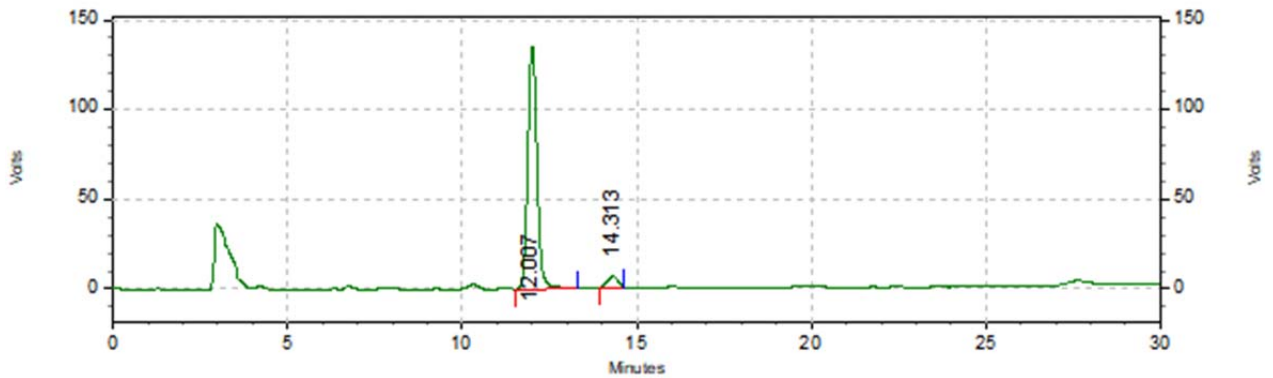

Results:

| Time   | Area    | Area%   | Height | Height% |
|--------|---------|---------|--------|---------|
| 12.007 | 2482705 | 95.162  | 135212 | 95.842  |
| 14.313 | 126217  | 4.838   | 5866   | 4.158   |
| Totals | 2608922 | 100.000 | 141078 | 100.000 |

#### 4. References

- (1) Espinosa, M.; Blay, G.; Cardona, L.; Merino, P.; Pedro, J. R. *Organic Chemistry Frontiers* **2019**, *6*, 2907.
- (2) Cele, Z. E. D.; Sosibo, S. C.; Andersson, P. G.; Kruger, H. G.; Maguire, G. E. M.; Govender, T. *Tetrahedron: Asymmetry* **2013**, *24*, 191.
- (3) Konda, S.; Zhao, J. C. G. *Tetrahedron Lett.* **2014**, *55*, 5216.
- (4) Zhou, L.; Lin, L.; Wang, W.; Ji, J.; Liu, X.; Feng, X. *Chem Commun (Camb)* **2010**, *46*, 3601.
